# Supplementary material for: Robust perisomatic GABAergic self-innervation inhibits basket cells in the human and mouse supragranular neocortex
Source: eLife. 2020 Jan 9;9:e51691. doi: 10.7554/eLife.51691 (PMC6984819; doi:10.7554/eLife.51691)
Supplement: Figure 1—source data 1. [file elife-51691-fig1-data1.xlsx]

## Sheet: Fig 1Ci
v041017_4
3.21
6.915
8.85
8.44
7.935
6.855
6.97
5.94
7.415
7.005
7.295
5.525
5.89
7.22
6.685
7.145
5.265
0.06
6.26
5.95
6.87
7.05
6.455
8.335
6.84
6.775
7.13
6.215
7.2
5.815
6.12
3.545
1.435
0.72
-0.045
0.66
0.25
0.23
-0.015
0.31
0.34
0.275
0.065
0.125
-0.06
0.29
0.475
0.66
0.87
0.155
0.365
0.475
0.23
0.31
0.43
0.095
0.75
0.29
0.66
0.445
0.095
0.29
0.66
0.26
0.215
0.585
0.045

## Sheet: Fig 1Cii
1.01214	0.809376	0.935199	1.15673
cell 1	cell 2	cell 3	cell 4	cell 5
1.01061	1.09598	1.53043	1.06404
0.63664	1.10394	0.988284	1.06166
0.974104	1.19062	1.15319	0.725521
1.11501	0.8023	0.603136	1.07676	1.0291
1.05911	0.997789	0.648314	0.872931	0.970901
0.981762	0.74038	0.407738	1.16576	1.09727
0.566696	0.271561	-0.129889	0.631752	0.766961
0.0681567	0.0601505	-0.455175	0.178798	0.521924
0.02374	0.206104	-0.398702	0.106484	0.527061
0.0472247	0.0796107	0.283497	0.095359	0.387333
0.00664	0.283061	0.284626	0.132708	0.191612
0.0727515	0.211411	0.117465	0.210584	0.186475
0.0709646	0.120301	0.364818	0.189923	-0.255311
0.0518195	0.118532	0.207822	-0.00795	-0.191612
0.0650935	-0.134454	0.0643796	-0.0135092	-0.0924668
0.0712199	-0.00796113	0.160385	0.101716	0.0580486
0.0533511	-0.0477665	0.153608	-0.0663541	0.0236304
0.0541169	0.0486511	0.147961
0.00689	0.0574969	-0.0903572
	0.113225	0.0451786
	0.012384
	-0.00442259
	0.0168069
	0.0441795
0.97836	1.17526	0.94763	1.01086	0.925261
0.973669	1.08001	1.02497	1.06365	1.0291
0.145343	0.239381	0.212762	0.2124	0.217154
0.0726716	0.119691	0.106381	0.1062	0.0971143
mean	0.99767	0.794165	0.715565	0.637325
sem	0.00232972	0.08698	0.0934431	0.0648435
0.97836	1.17526	0.94763	1.01086	0.925261
0.973669	1.08001	1.02497	1.06365	1.0291
0.145343	0.239381	0.212762	0.2124	0.217154
0.0726716	0.119691	0.106381	0.1062	0.0971143

## Sheet: Fig 1Di
v091018_1	Time (min)
7.79	0.333333
7.34749	0.416667
6.43253	0.5
6.08528	0.583333
5.16549	0.666667
5.4554	0.75
5.42489	0.833333
5.15023	0.916667
4.99764	1
4.69247	1.08333
4.15841	1.16667
4.20418	1.25
4.08211	1.33333
4.311	1.41667
3.74642	1.5
3.80746	1.58333
3.04452	1.66667
3.99056	1.75
3.42599	1.83333
4.20418	1.91667
3.82271	2
3.41073	2.08333
3.38021	2.16667
2.89193	2.25
3.15133	2.33333
2.43416	2.41667
4.38729	2.5
2.90719	2.58333
2.72408	2.66667
3.07503	2.75
3.63961	2.83333
2.90719	2.91667
2.98348	3
2.76986	3.08333
2.52572	3.16667
2.20528	3.25
1.70174	3.33333
2.43416	3.41667
2.02218	3.5
2.03744	3.58333
2.80038	3.66667
1.4576	3.75
1.44234	3.83333
2.2358	3.91667
1.51864	4
1.70174	4.08333
2.05269	4.16667
2.20528	4.25
2.03744	4.33333
1.48812	4.41667
1.77804	4.5
1.77804	4.58333
1.5339	4.66667
1.38131	4.75
1.42708	4.83333
1.76278	4.91667
1.33553	5
2.11373	5.08333
1.717	5.16667
1.9764	5.25
1.77804	5.33333
1.30501	5.41667
1.54915	5.5
1.07613	5.58333
1.36605	5.66667
1.24398	5.75
1.83907	5.83333
1.41183	5.91667
0.786218	6
1.96114	6.08333
1.1982	6.16667
1.94588	6.25
1.73226	6.33333
1.13717	6.41667
1.15243	6.5
2.00692	6.58333
0.984578	6.66667
1.28976	6.75
1.22872	6.83333
2.20528	6.91667
1.33553	7
1.44234	7.08333
1.13717	7.16667
1.04561	7.25
1.03036	7.33333
0.328453	7.41667
1.717	7.5
1.25924	7.58333
1.2745	7.66667
1.10665	7.75
0.831993	7.83333
0.923543	7.91667
0.984578	8
2.73934	8.08333
1.57967	8.16667
0.618368	8.25
#VALUE!	8.33333
#VALUE!	8.41667
0.954063	8.5
0.679403	8.58333
0.923543	8.66667
0.954063	8.75
1.21346	8.83333
1.0151	8.91667
0.648888	9
1.13717	9.08333
0.526818	9.16667
1.04561	9.25
0.770958	9.33333
0.801473	9.41667
1.12191	9.5
0.572593	9.58333
1.25924	9.66667
0.648888	9.75
0.679403	9.83333
1.59493	9.91667
1.04561	10
0.587853	10.0833
0.252158	10.1667
0.450523	10.25
-0.175087	10.3333
0.450523	10.4167
-0.0530175	10.5
0.236898	10.5833
0.450523	10.6667
-0.220862	10.75
-0.00724246	10.8333
0.267418	10.9167
0.374228	11
-0.0377575	11.0833
0.511558	11.1667
-0.129312	11.25
0.297933	11.3333
0.679403	11.4167
0.0690525	11.5
0.114828	11.5833
0.0843125	11.6667
0.725183	11.75
0.389488	11.8333
0.130088	11.9167
0.648888	12
0.0537925	12.0833
0.435263	12.1667
0.206383	12.25
-0.144572	12.3333
0.633628	12.4167
0.358968	12.5
-0.220862	12.5833
0.175863	12.6667
-0.0377575	12.75
-0.144572	12.8333
-0.0530175	12.9167
0.0232775	13
-0.175087	13.0833
0.0843125	13.1667
0.175863	13.25
-0.373452	13.3333
-0.114052	13.4167
-0.327677	13.5
-0.403972	13.5833
-0.220862	13.6667
-0.556557	13.75
-0.373452	13.8333
-0.00724246	13.9167
-0.0530175	14
-0.358192	14.0833
-0.632852	14.1667
0.130088	14.25
-0.358192	14.3333
-0.480262	14.4167
-0.434487	14.5
-0.846477	14.5833
-0.373452	14.6667
-0.312417	14.75
-0.876992	14.8333
-0.495522	14.9167
-0.754922	15
-0.815957	15.0833
-0.114052	15.1667
-0.388712	15.25
-0.541297	15.3333
-0.571817	15.4167
-0.907512	15.5
-0.190347	15.5833
-0.281897	15.6667
-1.04484	15.75
-0.739662	15.8333
-1.04484	15.9167
-0.648112	16
-0.678627	16.0833
-0.999062	16.1667
-0.770182	16.25
-0.999062	16.3333
-0.175087	16.4167
-0.297157	16.5
-0.709147	16.5833
-0.388712	16.6667
#VALUE!	16.75
#VALUE!	16.8333
-0.266642	16.9167
-0.663367	17
-0.358192	17.0833
-0.693887	17.1667
-0.342937	17.25
-1.19743	17.3333
-0.403972	17.4167
-0.678627	17.5
-0.556557	17.5833
-0.785437	17.6667
-0.754922	17.75
0.0995675	17.8333
-0.876992	17.9167
-0.770182	18
-0.754922	18.0833
-0.648112	18.1667
-0.846477	18.25
-1.28898	18.3333
-0.709147	18.4167
-1.25846	18.5
-0.541297	18.5833
-0.983802	18.6667
-1.04484	18.75
-0.114052	18.8333
-1.3195	18.9167
-1.8383	19
-1.18217	19.0833
-1.13639	19.1667
-1.28898	19.25
-1.62467	19.3333
-1.39579	19.4167
-0.0835375	19.5
-1.51786	19.5833
-1.70097	19.6667
-1.62467	19.75
-1.79252	19.8333
-2.0214	19.9167
-1.62467	20
-1.82304	20.0833
-2.11295	20.1667
-1.70097	20.25
-1.79252	20.3333
-1.71623	20.4167
-1.73148	20.5
-1.71623	20.5833
-1.762	20.6667
-2.11295	20.75
-1.92985	20.8333
-2.0214	20.9167
-2.5402	21
-2.40287	21.0833
-1.85356	21.1667
-2.31132	21.25
-2.5402	21.3333
-2.18925	21.4167
-2.73856	21.5
-2.89115	21.5833
-3.15055	21.6667
-2.63175	21.75
-2.55546	21.8333
-2.78434	21.9167
-2.41813	22
-2.57072	22.0833
-2.57072	22.1667
-2.26554	22.25
-3.19633	22.3333
-2.64701	22.4167
-3.059	22.5
-2.81486	22.5833
-3.28788	22.6667
-3.5778	22.75
-3.33366	22.8333
-2.99796	22.9167
-2.81486	23
-2.87589	23.0833
-2.61649	23.1667
-2.73856	23.25
-3.2421	23.3333
-2.89115	23.4167
-3.39469	23.5
-3.42521	23.5833
-2.76908	23.6667
-3.42521	23.75
-2.90641	23.8333
-3.48625	23.9167
-3.22685	24
-3.60832	24.0833
-2.87589	24.1667
-3.39469	24.25
-3.7609	24.3333
-3.47099	24.4167
-3.21159	24.5
-3.12003	24.5833
-3.08952	24.6667
-3.36418	24.75
-3.48625	24.8333
-3.34892	24.9167
-3.34892	25
-3.5015	25.0833
#VALUE!	25.1667
#VALUE!	25.25
-3.82194	25.3333
-3.36418	25.4167
-3.86772	25.5
-3.60832	25.5833
-3.54728	25.6667
-3.33366	25.75
-3.13529	25.8333
-3.16581	25.9167
-3.79142	26
-4.11186	26.0833
-3.8372	26.1667
-3.5778	26.25
	--
	--
	--
	--
	--
	--
	--
	--
	--
	--
	--
	--
	--
	--
	--
	--
	--
	--
	--
	--
	--
	--
	--
	--
	--
	--
	--

## Sheet: Fig 1Dii
cell 1	cell 2	cell 3	cell 4	cell 5	cell 6
1	1	1	1	0.986022	1
0.794737	0.459366	0.752455	0.714354	0.983889	1.06019
0.619906	0.616952	0.493862	0.554567	0.976212	1.03189
0.596038	0.478765	0.549121	0.531584	0.796827	0.871617
0.582911	0.112686	0.519286	0.442205	0.732278	0.843435
0.386598	0.161177	0.310416	0.427978	0.728622	0.829633
0.495197	-0.101	0.360142	0.315616	0.648406	1.1263
0.0757205	-0.156404	0.0860861	0.248856	0.532694	0.744276
0.00769736	-0.0739837	-0.0277462	0.258706	0.656368	0.577869
-0.125962	-0.112775	0.0374571	0.232804	0.660632	0.608237
0.0112775	-0.0327699	0.027506	0.216388	0.635257	0.572401
-0.238737	-0.246116	-0.0642189	0.201796	0.50854	0.578664
0.0560296	-0.115198	0.0264016	0.214199	0.477823	0.607541
0.261889	-0.151566	-0.00785132	0.206538	0.442283	0.563852
0.049466	-0.125	-0.0343802	0.159113	0.274543	0.545958
-0.012	-0.28733	-0.285239	0.195229	0.512224	0.497945
-0.190405	-0.195202	0.112606	#VALUE!	0.400112	0.4301
-0.0340712	0.100571	-0.0664242	0.131387	0.202614	0.366847
0.0226147	-0.323698	0.164543	0.133211	0.200623	0.214457
-0.108658	-0.420663	0.0849708	0.114971	0.293024	0.15016
0.152694	-0.103083	0.0540385	0.0325238	0.0968507	0.105904
0.000537025	-0.231562	0.045192	0.0212148	0.190672	0.0480791
0.022018	0.0302584	0.0241926	0.0266867	0.179585	0.0489143
0.131213	0.0375273	0.0960263	0.0569661	0.12713	0.0105032
-0.175488	0.29451	0.131387	0.0241331	0.141203	0.00925
0.0840742	-0.00610954	-0.153724	-0.00724	0.0938661	-0.0281549
0.0238081	-0.246108	0.122548	-0.0302237	0.0124124	0.00403
-0.0292977	-0.384303	-0.0763644	-0.0473696	-0.0140283	0.0103
0.241005	0.110271	-0.132728	-0.0564899	0.0341617	-0.0118
0.0882511	-0.185503	-0.0929422	-0.0805674	0.0209	0.0241
0.173578	-0.24127	0.0297222	-0.0688935	-0.0839678
-0.236947	-0.221871	0.0175659	-0.12325
-0.057939	-0.0861064	-0.00232538	-0.0798378
-0.0973208	0.206025	#VALUE!	#VALUE!
0.19864	0.216928	-0.002329	-0.094795
-0.323468	0.158754	0.0672921	-0.0885934
0.109732	0.0472349	0.224217	-0.134559
-0.139686	0.124817	0.102657	-0.158637
0.19864	-0.0448846	0.133603	-0.181985
0.0500627	-0.0909523	0.0286105	-0.262972
-0.0472	0.132086	0.194378	-0.24911
-0.132526	0.100571	#VALUE!	-0.307479
-0.169521	0.10784	0.33031	-0.378252
-0.201742	0.134509	0.118126	-0.371321
-0.109255	0.253296	0.293834	-0.412909
0.0948147	0.684835	0.129178	-0.435527
-0.271556	0.556347	0.275047	-0.441365
-0.574676	0.340578	0.317046	-0.466901
-0.997733	0.553916	0.124764	-0.479305
-0.824691	0.636352	0.341359	#VALUE!
	0.168446	0.121443	#VALUE!
	0.602399	0.151282	-0.511043
	0.401191	0.219795
	0.25815	0.191061
	0.561185	0.353519
	0.406037	0.682834
		0.357937
		0.387772
		#VALUE!
		0.320363
mean	0.99767	0.794165	0.715565	0.637325	0.5388
median	1	0.773596	0.618429	0.57258	0.551098
sd	0.00570662	0.213057	0.228888	0.158833	0.254349
sem	0.00232972	0.08698	0.0934431	0.0648435	0.103837
