# Supplementary material for: Robust perisomatic GABAergic self-innervation inhibits basket cells in the human and mouse supragranular neocortex
Source: eLife. 2020 Jan 9;9:e51691. doi: 10.7554/eLife.51691 (PMC6984819; doi:10.7554/eLife.51691)
Supplement: Figure 2—figure supplement 1—source data 1. [file elife-51691-fig2-figsupp1-data1.xlsx]

## Sheet: SFig 2Bi
human	mouse
0.6579	0.5678
1.931	0.9294
2.069	1.2256
2.5	1.2963
3.1724	1.3525
3.4483	1.6375
3.5172	2.0994
4.0714	2.6762
4.5172	2.9168
5.3158	2.9804
6.1379	3.2137
7.375	3.2139
9.6087	3.4783
15.8276	3.6218
	3.6565
	4.0337
	4.1939
	4.2329
	7.0653
	8.5038

## Sheet: SFig 2Bii
human	mouse
74.4092	29.1882
111.2	33.8064
111.579	36.5738
120.279	50.725
122.6	52.1431
140.266	52.5119
152.413	62.9089
179.999	64.4629
192.134	68.7611
212.875	72.8115
218.093	80.7781
257.779	84.166
313.332	88.4388
366.609	94.2685
	100.404
	100.564
	103.991
	104.264
	139.272
	196.211
