# Supplementary material for: Robust perisomatic GABAergic self-innervation inhibits basket cells in the human and mouse supragranular neocortex
Source: eLife. 2020 Jan 9;9:e51691. doi: 10.7554/eLife.51691 (PMC6984819; doi:10.7554/eLife.51691)
Supplement: Figure 2—figure supplement 2—source data 1. [file elife-51691-fig2-figsupp2-data1.xlsx]

## Sheet: SFig 3
	G leak (nS)	Gahp peak (nS)
cell 1	8.31401	20.2165
cell 2	7.12928	6.75495
cell 3	5.20472	17.3594
cell 4	8.99281	28.9499
cell 5	4.69764	17.5896
cell 6	13.4392	29.7082
cell 7	8.96226	23.9905
cell 8	4.58515	15.6478
cell 9	5.55556	12.018
cell 10	6.56109	17.4688
cell 11	3.19149	17.9679
cell 12	3.87931	15.8878
cell 13	2.72765	7.40475
cell 14	8.15661	13.8056
