# Supplementary material for: Robust perisomatic GABAergic self-innervation inhibits basket cells in the human and mouse supragranular neocortex
Source: eLife. 2020 Jan 9;9:e51691. doi: 10.7554/eLife.51691 (PMC6984819; doi:10.7554/eLife.51691)
Supplement: Figure 2—source data 1. [file elife-51691-fig2-data1.xlsx]

## Sheet: Fig 2Aiii
cell 1		cell 2		cell 3		cell 4		cell 5		cell 6		cell 7		cell 8		cell 9		cell 10		cell 11		cell 12		cell 13		cell 14
1.27006		0.942391		0.919841		1.13171		1.09547		1.10016		0.845223		0.962521		0.664545		1.03111		0.919593		1.00773		0.963664
1.19399		1.08854		1.09503		1.0286		0.990619		1.07502		0.885806		0.897237		1.68893		1.03409		0.940601		0.941338		0.925802
1.06138		1.06418		1.01752		1.00422		1.04265		1.03634		0.723306		1.2226		1.33882		0.998272		1.12253		1.08297		0.625081
0.947228		1.0317		0.962727		0.839659		1.09547		0.965874		0.855368		1.09506		0.720109		0.991199		0.894774		0.828556		1.03939		0.857653
0.774457		0.379446		0.996521		1.04997		0.93859		0.929787		1.26386		0.98358		0.805277		0.975498		1.09528		1.13168		1.29759		1.08686
0.752894		0.874729		1.00836		0.945837		0.837204		0.892819		1.48724		0.838995		0.782323		0.969835		1.02723		1.00773		1.14847		1.05549
0		0		0		0		0		0		0		0		0		0		0		0		0		0
0.703569		-0.15914		1.0348		0.946794		0.831126		0.813933		1.12432		0.744558		1.07366		0.954762		0.843999		0.979029		1.03722		0.928279
0.709701		-0.0590009		1.04491		0.684858		0.69157		0.802215		1.27418		0.738569		0.291261		0.928683		0.563117		1.53409		1.34026		0.860592
0.530798		0.882849		0.985515		0.473587		0.511346		0.749294		1.03051		0.420245		0.959096		0.884843		0.540893		0.888136		0.857217		0.927991
0.578101		0.328024		0.587639		0.34214		0.509642		0.642737		0.741103		0.588982		0.962314		0.856726		0.974018		0.523263		0.774355		0.722836
0.517456		0.915326		0.714503		0.497962		0.465395		0.537775		0.703015		0.424259		0.0426201		0.845102		0.737665		0.647207		0.594357		0.556653
0.575002		0.162929		0.976364		0.513531		0.240072		0.489915		0.302171		0.412216		1.126		0.835671		0		0.310891		0.487754		0.397807
0.433092		0.36862		0.723594		0.545627		0.110115		0.458063		0.380677		0.344892		0.648241		0.788228		0.728905		0.483398		0.49722		0.300213
0.449601		-0.134782		0.368544		0.545627		0.0442278		0.470661		0.368036		0.291717		0.759368		0.599393		0.720307		0.680258		0.172809		0.170659
0.194623		0.363208		0.585785		0.545691		-0.216652		0.379121		0		0.289743		0.723327		0.603161		0.633682		0.507897		-0.0984974		0.124964
0.407419		-0.0157588		0.51371		0.266207		0.054622		0.256556		0.436562		0.4032		0.372998		0.574251		0.482656		0.618359		-0.0267929		0.0443501
0.227506		0.206233		0.486256		0.478436		-0.00780044		0.146642		0.291859		0.370032		0.556422		0.507956		0.673264		0.43266		-0.129283		0.0546261
0.10096		0.533715		0.368604		0.654676		0.042467		0.105494		0.111729		0.259536		0.242348		0.450145		0.341607		0.399319		0.067831		0.0168066
0.323123		0.793535		0.32841		0.443405		-0.0563639		0.0618146		-0.0609166		0.31179		0.00979691		0.423757		0.48882		0.348581		0.00346857		0.0467415
0.131821		0.560779		0.301913		0.519338		0.0138969		0.0735871		-0.0456147		0.306788		0.189788		0.421245		0.249953		0.266822		0.0477589
0.0989381		-0.0752397		0.235341		0.157158		0.0811237		0.0626948		-0.109151		0.254535		0.255435		0.363743		0.0780004		0.103013		0.0637507
-0.015142		0.617615		0.322967		0.263272		0.175138		0.106374		-0.157219		0.253547		-7.15103e-05		0.34693		0.11012		0.0432879		-0.0387158
-0.346264		0.14669		0.255438		0.341183		0.122272		-0.141288		0.0988934		0.204321		-0.255363		0.317711		0.0284424		0.0322707		-0.0727397
0.410519		-0.259279		0.333853		0.512574		0.0425056		-0.0480984		0.091945		0.281714		-0.10867		0.220158		-0.0532349		0.0259802
-0.0491032		-0.0022265		0.226189		0.456996		0.101313		-0.1052				0.260589				0.170347		0.0136805		-0.0312888
-0.0074402		-0.243041		0.262675		0.258423		0.0332637		-0.1052				0.202347				0.140345		-0.0866521		-0.0833383
		-0.126109		0.0390943		0.252552		-0.0862735		-0.00953534				0.146079				0.0972986		0.0235759
		-0.0822663		-0.0859148		0.186382				0.114736				0.172206				0.0492276		0.0594263
														0.134102

## Sheet: Fig 2Biii
cell 1		cell 2		cell 3		cell 4		cell 5		cell 6		cell 7		cell 8		cell 9		cell 10		cell 11
1.21351		1.19009						0.862577		1.33501		1.01845		1.07917		1.00755		0.928583		0.924934
1.1192		1.03034		1.34395				0.748641		0.930394		1.0688		0.996107		0.90557		0.862638		1.0153
0.893244		0.91672		1.22233		0.781984		1.60682		1.15508		0.981247		1.13187		1.07855		1.6065		0.974634
0.828122		0.930879		0.3463		1.39006		0.87151		0.776366		1.00093		1.13003		1.11077		1.07581		0.968179
1.10908		0.802105		1.25502		0.761906		0.317206		0.891334		1.04034		0.991818		0.964945		1.10108		0.784871
0.89561		0.794852		1.30834		1.21786		1.23133		0.985286		0.894125		0.746279		0.924281		1.11587		0.897179
0		0		0		0		0		0		0		0		0		0		0
1.30136		0.665084		1.08573		1.26921		0.362019		0.757354		0.998316		0.538508		0.868894		1.69314		0.73388
1.10913		0.625908		0.676		0.386339		0.306076		1.04536		0.804392		0.369441		0.860481		1.2491		0.877816
0.96706		0.546196		0.80066		0.0418477		0.411		0.465197		0.69498		0.313257		0.67469		1.37184		0.787452
0.286517		0.532683		0.24239		-0.0419068		0.607758		0.833331		0.44985		0.394801		0.105396		1.08664		0.836507
0.896382		0.500069		0.438339		0.131003		0.388819		0.761571		0.451141		0.337651		0.265948		0.162455		0.711934
1.00235		0.529726		0.306928		0.0120998		0.666044		0.507368		0.127236		0.428886		0.0773524		0.859206		0.531208
0.468612		0.593294		-0.0722566		0.0175005		0.306222		1.45574		0.111917		0.277783		0.0261721		0.259928		0.59188
0.456833		0.464843		0.425626		-0.0284494		0.884984		0.92196		0.117597		0.386046		-0.104233		-0.00361011		0.489899
0.343049		0.355494		0.342538		0.232435		0.502755		0.706749		0.0961682		0.379585		0.0303787		0.703971		0.264636
0.106788		0.354177		0.295902		0.0202451		0.377689		0.803812		0.171013		0.268122		-0.261279		0.227437		0.117472
0.0235592		0.31826		0.174285		0.340389		0.102806		0.522163		0.0335446		0.45008		-0.0642698		0.238267		0.136836
0.00550401		0.184866		-0.203019		0.099927		0.181009		0.684557		0.124597		0.2552		-0.0123884		0.137184		0.0187181
0.163268		0.249103		0.0406038		0.154022		0.0803998		0.372351		-0.0250915		0.215138		0.0766513		0.245487		0.0897179
-0.168721		0.220783		-0.0879467		0.291783		0.169879		0.0790884		-0.0666876		0.189325				0.382671		0.0877816
		0.169735		-0.0550307		0.113384		-0.0446812		0.615009		-0.123144		0.188872				0.136996		-0.0103272
		0.212214		0.284032		-0.131062		0.01113		0.126583		-0.0898312		0.117924				-0.0930773		-0.0774543
		0.121321		0.17409		0.0242292		-0.0267999		0.0379541				0.12206				0.0672622
		0.115061		-0.143475		-0.132478		0.0446666		0.284829				0.0986022
		0.132502		-0.0753699		-0.0553641		-0.100463		0.185623				0.0902998
		0.16149				-0.141863		0.055943		0.10446				0.128974
		0.225403				0.0215731		0.0594663		0.001037				0.0755668
		0.206624				-0.243236		-0.0149035		-0.105497				0.010144
		0.128573				-0.101314								0.00597772
		0.108456				-0.032522								-0.0161217
		0.103535				-0.083784
		0.0297582				-0.135135
		0.0159224				-0.162138
		-0.0436948				-0.0811279
		-0.013066				-0.048724
		0.0106557				0.0431758
		0.0024103				0.0809804
						0.0202451

## Sheet: Fig 1Ci-iii
Gaut human		Rm human		Gaut+Gleak/Gleak human			Gaut mouse		Rm mouse		Gaut+Gleak/Gleak mouse
0.6579		74.4092		1.049			1.18519		104.893		1.14131
1.931		111.2		1.2309			1.47059		112.828		1.15426
2.069		111.579		1.371			1.93103		119.234		1.32424
2.5		120.279		1.3816			2		122.02		1.3513
3.1724		122.6		1.4527			3.39286		135.669		1.58921
3.4483		140.266		1.5361			4.09375		144.758		1.64115
3.5172		152.413		1.6336			5.22222		146.446		1.71977
4.0714		179.999		1.6444			5.33333		156.617		1.72357
4.5172		192.134		1.7521			5.66667		160.306		1.78296
5.3158		212.875		1.7525			6.41667		162.122		1.96742
6.1379		218.093		2.5699			7.21429		170.721		2.15649
7.375		257.779		2.6485
9.6087		313.332		3.849
15.8276		366.609		4.5227
