# Supplementary material for: Robust perisomatic GABAergic self-innervation inhibits basket cells in the human and mouse supragranular neocortex
Source: eLife. 2020 Jan 9;9:e51691. doi: 10.7554/eLife.51691 (PMC6984819; doi:10.7554/eLife.51691)
Supplement: Figure 3—source data 1. [file elife-51691-fig3-data1.xlsx]

## Sheet: Fig 3Aii inset
Gaut/Gahp at Gaut peak time point
0.218781
0.858255
0.0859525
0.376595
0.589337
0.172701
0.374103
0.925923
0.294251
0.698895
0.244647
1.68055
0.589894

## Sheet: Fig 3Aii main
cell 1		cell 2		cell 3		cell 4		cell 5		cell 6		cell 7		cell 8		cell 9		cell 10		cell 11		cell 12		cell 13
Gahp	Gaut	Gahp	Gaut	Gahp	Gaut	Gahp	Gaut	Gahp	Gaut	Gahp	Gaut	Gahp	Gaut	Gahp	Gaut	Gahp	Gaut	Gahp	Gaut	Gahp	Gaut	Gahp	Gaut	Gahp	Gaut
4.7546		1.0942		7.4267		0.5251		3.8865		2.1722		1.6238		4		5.6402		0.5		2.489		0.5354		1.8
6.3891		1.689		9.8201		1.5144		5.2744		3.4272		2.6617		5.9781		7.1104		1.4731		3.8693		1.1428		2.9077
8.4877		2.4528		12.8932		3.1456		7.0564		5.1787		4.1104		8.7387		8.9061		3.0774		5.7957		1.9906		4.4537
11.1825		3.4334		16.8393		5.8349		9.3447		7.623		6.1321		12.5914		11.0993		5.7225		8.4842		3.1737		6.6112
14.6426		4.6926		21.9061		10.2688		12.2828		11.0344		8.9536		17.9683		13.7781		10.0836		12.2362		4.8248		9.6223
20.2165		6.7549		26.3594		17.5896		15.8878		15.6478		12.018		25.2471		17.7081		17.4688		17.9679		7.4048		13.8056
19.8284		6.6654		25.9665		17.1288		15.681		15.4258		11.8426		24.3913		17.223		16.7182		17.4421		7.2564		13.5851
19.4477		6.5771		25.5794		16.68		15.4769		15.207		11.6697		23.5646		16.7512		15.9998		16.9316		7.111		13.368
19.0743		6.49		25.1981		16.243		15.2755		14.9913		11.4993		22.7659		16.2923		15.3123		16.4361		6.9686		13.1544
18.7081		6.4041		24.8225		15.8174		15.0767		14.7787		11.3314		21.9942		15.8459		14.6544		15.9551		6.829		12.9442
18.3489		6.3193		24.4525		15.403		14.8804		14.5691		11.166		21.2487		15.4118		14.0247		15.4881		6.6922		12.7374
17.9966		6.2356		24.088		14.9995		14.6868		14.3624		11.003		20.5285		14.9896	5.3158	13.4221		15.0348		6.5581		12.5339
17.6511		6.153		23.7289		14.6065		14.4956		14.1587		10.8424		19.8327		14.579	5.1074	12.8454		14.5948		6.4268		12.3336
17.3122		6.0715		23.3752		14.2238		14.3069		13.9579		10.6841		19.1605		14.1796	4.9071	12.2934		14.1677		6.298		12.1365
16.9798		5.9911		23.0268		13.8512		14.1207		13.7599		10.5281		18.511		13.7911	4.7147	11.7652		13.7531		6.1718		11.9426
16.6538		5.9117		22.6835		13.4883		13.9369		13.5647		10.3745		17.8836	15.82	13.4133	4.5298	11.2596		13.3506		6.0482		11.7518
16.334		5.8334		22.3454		13.1349		13.7555		13.3723		10.223		17.2774	15.3615	13.0458	4.3522	10.7758		12.9598		5.927		11.564
16.0204		5.7561		22.0123		12.7908		13.5765		13.1826		10.0738		16.6918	14.9163	12.6884	4.1816	10.3128		12.5805		5.8083		11.3792
15.7128		5.6799		21.6842		12.4557		13.3998		12.9957		9.9267		16.126	14.4839	12.3408	4.0176	9.8697		12.2124		5.6919		11.1974
15.4112		5.6047		21.3609		12.1293		13.2254		12.8113		9.7818		15.5794	14.0641	12.0027	3.8601	9.4456		11.855		5.5779		11.0185
15.1153		5.5304		21.0425	1.93	11.8115		13.0532		12.6296		9.639		15.0514	13.6565	11.6739	3.7087	9.0397		11.508		5.4662		10.8424
14.8251		5.4572		20.7288	1.8823	11.5021		12.8834		12.4505		9.4983		14.5412	13.2607	11.3541	3.5633	8.6513		11.1712		5.3567		10.6692
14.5404		5.3849		20.4198	1.8359	11.2007		12.7157		12.2739		9.3596		14.0483	12.8764	11.0431	3.4236	8.2796		10.8443		5.2494		10.4987
14.2613	3.17	5.3136		20.1154	1.7905	10.9073		12.5502		12.0998		9.223		13.5722	12.5032	10.7405	3.2893	7.9238		10.5269		5.1442		10.331
13.9875	3.1201	5.2432	4.5	19.8156	1.7463	10.6215	4	12.3868	7.3	11.9281	2.06	9.0884	3.4	13.1121	12.1408	10.4463	3.1604	7.5834		10.2188	2.5	5.0412	9.6	10.1659
13.7189	3.0709	5.1738	4.4109	19.5202	1.7032	10.3432	3.8462	12.2256	7.1555	11.759	2.0184	8.9557	3.3117	12.6677	11.7889	10.1601	3.0364	7.2575		9.9198	2.4505	4.9402	9.363	10.0034
13.4555	3.0226	5.1052	4.3236	19.2292	1.6612	10.0723	3.6983	12.0665	7.0138	11.5922	1.9776	8.8249	3.2257	12.2383	11.4472	9.8818	2.9174	6.9457		9.6294	2.402	4.8412	9.1318	9.8436
13.1972	2.975	5.0376	4.2379	18.9426	1.6202	9.8084	3.556	11.9094	6.8749	11.4277	1.9377	8.6961	3.1419	11.8235	11.1154	9.611	2.803	6.6472		9.3476	2.3544	4.7442	8.9063	9.6863
12.9438	2.9281	4.9709	4.154	18.6602	1.5802	9.5514	3.4193	11.7544	6.7387	11.2656	1.8985	8.5692	3.0603	11.4227	10.7933	9.3477	2.6931	6.3616		9.0741	2.3078	4.6492	8.6864	9.5316	6.1379
12.6953	2.882	4.9051	4.0718	18.3821	1.5411	9.3012	3.2878	11.6014	6.6053	11.1059	1.8602	8.4441	2.9808	11.0356	10.4804	9.0917	2.5875	6.0882		8.8085	2.2621	4.556	8.472	9.3793	5.9968
12.4515	2.8366	4.8401	3.9911	18.108	1.5031	9.0575	3.1614	11.4504	6.4745	10.9483	1.8226	8.3208	2.9034	10.6615	10.1767	8.8426	2.486	5.8266		8.5507	2.2173	4.4648	8.2628	9.2294	5.859
12.2125	2.792	4.776	3.9121	17.8381	1.466	8.8202	3.0398	11.3014	6.3463	10.793	1.7858	8.1993	2.828	10.3002	9.8817	8.6003	2.3885	5.5763	5.3	8.3005	2.1734	4.3753	8.0588	9.0819	5.7243
11.978	2.748	4.7127	3.8346	17.5722	1.4298	8.5891	2.9229	11.1543	6.2206	10.6399	1.7497	8.0796	2.7545	9.951	9.5953	8.3647	2.2949	5.3367	5.1369	8.0575	2.1304	4.2877	7.8598	8.9368	5.5927
11.748	2.7047	4.6503	3.7587	17.3103	1.3945	8.3641	2.8105	11.0091	6.0975	10.489	1.7143	7.9617	2.683	9.6137	9.3172	8.1356	2.2049	5.1074	4.9789	7.8217	2.0882	4.2018	7.6658	8.794	5.4641
11.5225	2.6621	4.5887	3.6843	17.0522	1.36	8.1449	2.7024	10.8658	5.9767	10.3402	1.6797	7.8455	2.6133	9.2879	9.0472	7.9127	2.1184	4.8879	4.8257	7.5928	2.0468	4.1176	7.4765	8.6535	5.3385
11.3012	2.6202	4.5279	3.6113	16.798	1.3265	7.9315	2.5985	10.7244	5.8584	10.1936	1.6458	7.7309	2.5454	8.9731	8.7849	7.6959	2.0354	4.6779	4.6772	7.3706	2.0063	4.0351	7.2919	8.5152	5.2158
11.0843	2.579	4.468	3.5398	16.5476	1.2937	7.7237	2.4985	10.5848	5.7424	10.049	1.6125	7.6181	2.4793	8.6689	8.5303	7.4851	1.9556	4.4769	4.5333	7.1549	1.9666	3.9543	7.1119	8.3792	5.0959
10.8714	2.5383	4.4088	3.4697	16.301	1.2618	7.5214	2.4025	10.4471	5.6287	9.9065	1.58	7.5069	2.4149	8.3751	8.2831	7.28	1.8789	4.2845	4.3939	6.9455	1.9276	3.8751	6.9363	8.2453	4.9788
10.6627	2.4984	4.3504	3.401	16.058	1.2306	7.3243	2.3101	10.3111	5.5172	9.7659	1.548	7.3973	2.3522	8.0912	8.043	7.0806	1.8052	4.1004	4.2587	6.7422	1.8895	3.7975	6.765	8.1135	4.8643
10.458	2.459	4.2928	3.3337	15.8186	1.2002	7.1324	2.2212	10.1769	5.408	9.6274	1.5168	7.2893	2.2911	7.817	7.8099	6.8866	1.7344	3.9242	4.1276	6.5449	1.852	3.7214	6.598	7.9839	4.7525
10.2572	2.4203	4.2359	3.2677	15.5828	1.1706	6.9456	2.1358	10.0444	5.3009	9.4909	1.4861	7.1829	2.2316	7.552	7.5835	6.698	1.6664	3.7556	4.0006	6.3534	1.8154	3.6468	6.4351	7.8563	4.6432
10.0603	2.3822	4.1798	3.203	15.3505	1.1417	6.7636	2.0537	9.9137	5.1959	9.3562	1.4561	7.078	2.1736	7.296	7.3637	6.5145	1.6011	3.5942	3.8776	6.1674	1.7794	3.5738	6.2762	7.7308	4.5365
9.8671	2.3447	4.1245	3.1395	15.1217	1.1135	6.5864	1.9747	9.7846	5.093	9.2235	1.4267	6.9747	2.1172	7.0487	7.1503	6.336	1.5383	3.4398	3.7583	5.9869	1.7442	3.5022	6.1212	7.6073	4.4322
9.6777	2.3077	4.0698	3.0774	14.8963	1.086	6.4138	1.8988	9.6573	4.9922	9.0927	1.3979	6.8729	2.0622	6.8098	6.9431	6.1624	1.478	3.292	3.6426	5.8117	1.7097	3.432	5.9701	7.4857	4.3303
9.4919	2.2714	4.0159	3.0164	14.6742	1.0592	6.2458	1.8257	9.5316	4.8933	8.9637	1.3696	6.7725	2.0086	6.579	6.7418	5.9936	1.42	3.1505	3.5306	5.6416	1.6758	3.3633	5.8227	7.3661	4.2308
9.3096	2.2356	3.9627	2.9567	14.4555	1.0331	6.0822	1.7555	9.4075	4.7964	8.8366	1.342	6.6737	1.9565	6.356	6.5464	5.8294	1.3644	3.0152	3.4219	5.4765	1.6426	3.2959	5.6789	7.2484	4.1335
9.1309	2.2004	3.9103	2.8982	14.24	1.0075	5.9228	1.688	9.2851	4.7015	8.7112	1.3149	6.5762	1.9057	6.1406	6.3567	5.6697	1.3109	2.8856	3.3167	5.3162	1.6101	3.2299	5.5387	7.1326	4.0385
8.9556	2.1658	3.8585	2.8408	14.0277	0.9827	5.7676	1.6231	9.1642	4.6084	8.5877	1.2883	6.4802	1.8562	5.9324	6.1725	5.5144	1.2595	2.7616	3.2146	5.1607	1.5782	3.1652	5.402	7.0186	3.9457
8.7836	2.1317	3.8074	2.7845	13.8186	0.9584	5.6165	1.5607	9.045	4.5171	8.4659	1.2623	6.3856	1.808	5.7314	5.9936	5.3633	1.2101	2.643	3.1157	5.0096	1.547	3.1018	5.2686	6.9065	3.855
8.615	2.0981	3.7569	2.7294	13.6127	0.9347	5.4694	1.5007	8.9272	4.4277	8.3458	1.2368	6.2924	1.761	5.5371	5.8199	5.2164	1.1626	2.5294	3.0198	4.863	1.5163	3.0396	5.1385	6.7961	3.7664
8.4496	2.0651	3.7072	2.6753	13.4097	0.9117	5.3261	1.4429	8.8111	4.34	8.2274	1.2118	6.2006	1.7153	5.3494	5.6512	5.0735	1.117	2.4207	2.9269	4.7207	1.4863	2.9787	5.0116	6.6875	3.6798
8.2874	2.0325	3.6581	2.6224	13.2098	0.8892	5.1865	1.3875	8.6964	4.2541	8.1107	1.1873	6.11	1.6707	5.1681	5.4874	4.9345	1.0732	2.3167	2.8369	4.5825	1.4569	2.9191	4.8879	6.5807	3.5952
8.1283	2.0005	3.6096	2.5704	13.0129	0.8672	5.0507	1.3341	8.5832	4.1698	7.9957	1.1633	6.0209	1.6273	4.9929	5.3283	4.7993	1.0312	2.2172	2.7496	4.4484	1.428	2.8606	4.7672	6.4755	3.5126
7.9722	1.969	3.5618	2.5195	12.819	0.8458	4.9183	1.2828	8.4715	4.0873	7.8823	1.1398	5.933	1.5851	4.8237	5.1739	4.6678	0.9907	2.1219	2.665	4.3182	1.3997	2.8033	4.6495	6.3721	3.4318
7.8191	1.938	3.5146	2.4697	12.6279	0.8249	4.7895	1.2335	8.3612	4.0063	7.7705	1.1168	5.8463	1.5439	4.6602	5.0239	4.5399	0.9519	2.0307	2.583	4.1918	1.372	2.7471	4.5347	6.2702	3.3529
7.669	1.9075	3.4681	2.4207	12.4396	0.8045	4.664	1.186	8.2524	3.927	7.6602	1.0942	5.761	1.5038	4.5022	4.8783	4.4156	0.9146	1.9435	2.5035	4.0692	1.3449	2.6921	4.4228	6.1701	3.2758
7.5218	1.8775	3.4221	2.3728	12.2542	0.7847	4.5418	1.1404	8.145	3.8492	7.5516	1.0721	5.6769	1.4647	4.3496	4.7369	4.2946	0.8787	1.86	2.4265	3.9501	1.3182	2.6382	4.3136	6.0715	3.2005
7.3774	1.8479	3.3768	2.3258	12.0715	0.7653	4.4228	1.0966	8.039	3.773	7.4445	1.0505	5.594	1.4267	4.2022	4.5997	4.1769	0.8442	1.78	2.3519	3.8345	1.2921	2.5853	4.2071	5.9745	3.127
7.2357	1.8188	3.3321	2.2798	11.8916	0.7464	4.3069	1.0544	7.9343	3.6983	7.3389	1.0292	5.5124	1.3896	4.0598	4.4663	4.0625	0.8111	1.7035	2.2795	3.7223	1.2665	2.5335	4.1032	5.879	3.0551
7.0968	1.7902	3.288	2.2346	11.7143	0.728	4.1941	1.0138	7.8311	3.6251	7.2348	1.0085	5.4319	1.3535	3.9222	4.3369	3.9512	0.7793	1.6303	2.2094	3.6133	1.2415	2.4828	4.0019	5.7851	2.9849
6.9605	1.762	3.2444	2.1904	11.5397	0.71	4.0842	0.9749	7.7291	3.5533	7.1322	0.9881	5.3526	1.3184	3.7892	4.2112	3.843	0.7488	1.5603	2.1414	3.5076	1.2169	2.433	3.9031	5.6926	2.9162
6.8269	1.7342	3.2014	2.147	11.3677	0.6925	3.9772	0.9374	7.6285	3.4829	7.031	0.9681	5.2745	1.2841	3.6608	4.0891	3.7377	0.7194	1.4933	2.0755	3.4049	1.1928	2.3843	3.8067	5.6017	2.8492
6.6958	1.7069	3.159	2.1045	11.1982	0.6754	3.873	0.9013	7.5292	3.414	6.9313	0.9486	5.1975	1.2508	3.5367	3.9706	3.6353	0.6912	1.4291	2.0117	3.3053	1.1692	2.3365	3.7127	5.5122	2.7837
6.5673	1.68	3.1172	2.0628	11.0313	0.6587	3.7715	0.8667	7.4312	3.3464	6.833	0.9294	5.1216	1.2183	3.4168	3.8555	3.5357	0.6641	1.3677	1.9498	3.2085	1.146	2.2897	3.621	5.4241	2.7197
6.4412	1.6536	3.0759	2.022	10.8669	0.6424	3.6727	0.8333	7.3345	3.2801	6.736	0.9106	5.0468	1.1867	3.301	3.7438	3.4388	0.6381	1.3089	1.8898	3.1146	1.1233	2.2438	3.5316	5.3374	2.6572
6.3175	1.6275	3.0352	1.9819	10.7049	0.6266	3.5765	0.8013	7.2391	3.2152	6.6405	0.8922	4.9731	1.1558	3.1891	3.6353	3.3446	0.613	1.2527	1.8316	3.0235	1.1011	2.1989	3.4444	5.2521	2.5961
6.1962	1.6019	2.995	1.9427	10.5453	0.6111	3.4828	0.7705	7.1448	3.1515	6.5463	0.8742	4.9005	1.1258	3.081	3.5299	3.253	0.589	1.1988	1.7753	2.935	1.0793	2.1548	3.3594	5.1682	2.5364
6.0773	1.5767	2.9553	1.9042	10.3881	0.596	3.3916	0.7408	7.0518	3.0891	6.4535	0.8565	4.829	1.0966	2.9766	3.4276	3.1639	0.5659	1.1473	1.7207	2.8491	1.0579	2.1117	3.2765	5.0856	2.4781
5.9606	1.5518	2.9162	1.8665	10.2333	0.5813	3.3027	0.7123	6.9601	3.0279	6.3619	0.8392	4.7585	1.0681	2.8757	3.3283	3.0772	0.5437	1.098	1.6677	2.7657	1.037	2.0694	3.1956	5.0044	2.4212
5.8461	1.5274	2.8775	1.8296	10.0807	0.567	3.2162	0.6849	6.8695	2.968	6.2717	0.8223	4.689	1.0404	2.7782	3.2318	2.9929	0.5224	1.0509	1.6164	2.6848	1.0164	2.0279	3.1167	4.9244	2.3655
5.7339	1.5034	2.8394	1.7933	9.9304	0.553	3.1319	0.6586	6.7801	2.9092	6.1827	0.8057	4.6206	1.0133	2.6841	3.1381	2.9109	0.5019	1.0057	1.5667	2.6062	0.9963	1.9873	3.0397	4.8457	2.3111
5.6238	1.4797	2.8018	1.7578	9.7824	0.5393	3.0499	0.6333	6.6918	2.8516	6.095	0.7894	4.5531	0.987	2.5931	3.0472	2.8312	0.4822	0.9625	1.5185	2.5299	0.9766	1.9475	2.9647	4.7683	2.258
5.5158	1.4564	2.7647	1.723	9.6366	0.526	2.97	0.6089	6.6047	2.7951	6.0086	0.7735	4.4867	0.9614	2.5052	2.9589	2.7536	0.4633	0.9211	1.4718	2.4559	0.9572	1.9085	2.8915	4.6921	2.2061
5.4099	1.4334	2.7281	1.6889	9.4929	0.513	2.8921	0.5855	6.5188	2.7398	5.9233	0.7578	4.4212	0.9364	2.4203	2.8731	2.6782	0.4452	0.8816	1.4265	2.384	0.9383	1.8702	2.8201	4.6171	2.1554
5.3061	1.4109	2.692	1.6555	9.3514	0.5003	2.8164	0.563	6.4339	2.6855	5.8393	0.7425	4.3566	0.9121	2.3382	2.7898	2.6048	0.4277	0.8437	1.3826	2.3142	0.9197	1.8328	2.7504	4.5434	2.1058
5.2042	1.3887	2.6563	1.6227	9.212	0.488	2.7426	0.5413	6.3502	2.6323	5.7565	0.7275	4.293	0.8884	2.259	2.709	2.5334	0.4109	0.8074	1.34	2.2465	0.9015	1.7961	2.6825	4.4708	2.0574
5.1043	1.3668	2.6211	1.5905	9.0747	0.4759	2.6707	0.5205	6.2675	2.5802	5.6748	0.7128	4.2304	0.8653	2.1824	2.6305	2.464	0.3948	0.7727	1.2988	2.1808	0.8836	1.7601	2.6163	4.3993	2.0101
5.0063	1.3453	2.5864	1.5591	8.9394	0.4642	2.6008	0.5005	6.1859	2.5291	5.5944	0.6984	4.1686	0.8429	2.1084	2.5542	2.3965	0.3793	0.7395	1.2589	2.1169	0.8661	1.7248	2.5517	4.329	1.9639
4.9101	1.3241	2.5521	1.5282	8.8062	0.4527	2.5326	0.4813	6.1054	2.479	5.515	0.6843	4.1078	0.821	2.037	2.4802	2.3309	0.3645	0.7077	1.2201	2.055	0.849	1.6903	2.4887	4.2599	1.9188
4.8159	1.3032	2.5183	1.4979	8.6749	0.4415	2.4663	0.4627	6.026	2.43	5.4368	0.6705	4.0478	0.7996	1.9679	2.4083	2.267	0.3502	0.6773	1.1826	1.9948	0.8322	1.6564	2.4273	4.1918	1.8747
4.7234	1.2827	2.485	1.4683	8.5456	0.4306	2.4017	0.445	5.9475	2.3818	5.3597	0.6569	3.9887	0.7789	1.9012	2.3385	2.2049	0.3364	0.6482	1.1462	1.9365	0.8157	1.6232	2.3673	4.1248	1.8316
4.6327	1.2625	2.4521	1.4392	8.4182	0.42	2.3387	0.4278	5.8701	2.3347	5.2836	0.6437	3.9305	0.7586	1.8368	2.2707	2.1445	0.3233	0.6204	1.1109	1.8798	0.7995	1.5907	2.3089	4.0589	1.7895
4.5438	1.2426	2.4196	1.4107	8.2927	0.4096	2.2775	0.4114	5.7937	2.2884	5.2087	0.6307	3.8731	0.7389	1.7745	2.2049	2.0858	0.3106	0.5937	1.0768	1.8248	0.7837	1.5588	2.2519	3.9941	1.7483
4.4565	1.2231	2.3876	1.3828	8.1691	0.3995	2.2178	0.3956	5.7183	2.2431	5.1348	0.6179	3.8165	0.7197	1.7144	2.141	2.0286	0.2984	0.5682	1.0436	1.7714	0.7682	1.5276	2.1963	3.9302	1.7082
4.371	1.2038	2.3559	1.3554	8.0473	0.3897	2.1597	0.3804	5.6439	2.1987	5.062	0.6054	3.7608	0.7011	1.6563	2.079	1.973	0.2867	0.5438	1.0115	1.7195	0.753	1.497	2.142	3.8674	1.6689
4.2871	1.1848	2.3247	1.3285	7.9274	0.38	2.1031	0.3657	5.5704	2.1552	4.9902	0.5932	3.7059	0.6828	1.6001	2.0187	1.919	0.2755	0.5204	0.9804	1.6692	0.7381	1.467	2.0892	3.8057	1.6305
4.2047	1.1662	2.2939	1.3022	7.8092	0.3707	2.048	0.3517	5.4979	2.1125	4.9194	0.5812	3.6518	0.6651	1.5459	1.9602	1.8664	0.2647	0.4981	0.9502	1.6204	0.7235	1.4376	2.0376	3.7448	1.593
4.124	1.1478	2.2636	1.2764	7.6928	0.3615	1.9943	0.3381	5.4264	2.0707	4.8496	0.5695	3.5985	0.6478	1.4935	1.9034	1.8153	0.2543	0.4767	0.921	1.5729	0.7091	1.4088	1.9873	3.685	1.5564
4.0448	1.1297	2.2336	1.2512	7.5781	0.3526	1.9421	0.3251	5.3557	2.0297	4.7808	0.558	3.546	0.631	1.4429	1.8482	1.7656	0.2443	0.4562	0.8927	1.5269	0.6951	1.3806	1.9382	3.6261	1.5206
3.9672	1.1119	2.204	1.2264	7.4652	0.3439	1.8912	0.3126	5.286	1.9895	4.713	0.5467	3.4942	0.6146	1.394	1.7946	1.7172	0.2347	0.4366	0.8652	1.4822	0.6813	1.353	1.8904	3.5682	1.4857
3.891	1.0944	2.1748	1.2021	7.3539	0.3354	1.8417	0.3006	5.2172	1.9501	4.6462	0.5357	3.4432	0.5987	1.3467	1.7426	1.6701	0.2255	0.4178	0.8386	1.4388	0.6678	1.3259	1.8437	3.5112	1.4515
3.8163	1.0772	2.146	1.1783	7.2443	0.3271	1.7934	0.289	5.1493	1.9115	4.5803	0.5249	3.3929	0.5831	1.3011	1.6921	1.6244	0.2167	0.3999	0.8128	1.3967	0.6546	1.2993	1.7982	3.4551	1.4182
3.743	1.0602	2.1176	1.155	7.1363	0.319	1.7464	0.2779	5.0823	1.8736	4.5153	0.5142	3.3434	0.568	1.257	1.6431	1.5799	0.2082	0.3827	0.7878	1.3559	0.6417	1.2733	1.7538	3.3999	1.3856
3.6712	1.0435	2.0895	1.1321	7.0299	0.3112	1.7007	0.2672	5.0162	1.8365	4.4513	0.5039	3.2946	0.5532	1.2144	1.5955	1.5366	0.2	0.3662	0.7635	1.3162	0.6289	1.2478	1.7105	3.3455	1.3537
3.6007	1.0271	2.0618	1.1097	6.9251	0.3035	1.6561	0.257	4.9509	1.8002	4.3881	0.4937	3.2465	0.5388	1.1732	1.5492	1.4945	0.1922	0.3505	0.74	1.2777	0.6165	1.2228	1.6682	3.2921	1.3226
3.5316	1.0109	2.0345	1.0877	6.8219	0.296	1.6127	0.2471	4.8864	1.7645	4.3259	0.4837	3.1991	0.5248	1.1334	1.5043	1.4536	0.1846	0.3354	0.7173	1.2403	0.6043	1.1983	1.627	3.2395	1.2922
3.4638	0.995	2.0076	1.0662	6.7202	0.2887	1.5705	0.2376	4.8228	1.7296	4.2645	0.4739	3.1524	0.5112	1.095	1.4607	1.4138	0.1774	0.321	0.6952	1.204	0.5923	1.1743	1.5869	3.1877	1.2625
3.3972	0.9793	1.981	1.0451	6.62	0.2815	1.5293	0.2284	4.7601	1.6953	4.204	0.4644	3.1064	0.4979	1.0579	1.4184	1.375	0.1704	0.3072	0.6738	1.1687	0.5806	1.1507	1.5477	3.1368	1.2335
3.332	0.9639	1.9548	1.0244	6.5213	0.2746	1.4893	0.2197	4.6981	1.6618	4.1444	0.455	3.0611	0.485	1.0221	1.3773	1.3374	0.1638	0.294	0.6531	1.1345	0.5691	1.1277	1.5095	3.0867	1.2051
3.268	0.9487	1.9289	1.0041	6.4241	0.2678	1.4502	0.2112	4.637	1.6289	4.0856	0.4458	3.0164	0.4724	0.9874	1.3373	1.3007	0.1573	0.2814	0.633	1.1013	0.5578	1.1051	1.4722	3.0373	1.1774
3.2053	0.9338	1.9033	0.9842	6.3284	0.2612	1.4122	0.2031	4.5766	1.5966	4.0277	0.4368	2.9723	0.4601	0.9539	1.2986	1.2651	0.1512	0.2693	0.6135	1.0691	0.5468	1.083	1.4359	2.9888	1.1503
3.1438	0.9191	1.8781	0.9647	6.234	0.2547	1.3752	0.1953	4.517	1.565	3.9705	0.428	2.9289	0.4482	0.9216	1.2609	1.2304	0.1452	0.2577	0.5946	1.0378	0.536	1.0613	1.4004	2.9411	1.1239
3.0834	0.9046	1.8532	0.9456	6.1411	0.2485	1.3392	0.1878	4.4582	1.534	3.9142	0.4193	2.8862	0.4365	0.8904	1.2244	1.1967	0.1396	0.2467	0.5763	1.0074	0.5253	1.04	1.3658	2.8941	1.0981
3.0242	0.8904	1.8287	0.9269	6.0496	0.2423	1.3041	0.1806	4.4002	1.5036	3.8587	0.4108	2.844	0.4252	0.8602	1.1889	1.1639	0.1341	0.2361	0.5586	0.9779	0.5149	1.0192	1.3321	2.8478	1.0728
2.9661	0.8764	1.8045	0.9085	5.9594	0.2363	1.27	0.1736	4.3429	1.4738	3.804	0.4025	2.8025	0.4142	0.831	1.1545	1.132	0.1288	0.2259	0.5414	0.9493	0.5047	0.9987	1.2992	2.8023	1.0482
2.9092	0.8626	1.7806	0.8905	5.8706	0.2305	1.2367	0.1669	4.2864	1.4447	3.75	0.3944	2.7616	0.4034	0.8029	1.121	1.101	0.1238	0.2162	0.5248	0.9215	0.4947	0.9787	1.2671	2.7575	1.0241
2.8533	0.849	1.757	0.8729	5.783	0.2248	1.2043	0.1605	4.2306	1.4161	3.6968	0.3864	2.7213	0.3929	0.7757	1.0885	1.0709	0.1189	0.2069	0.5086	0.8946	0.485	0.9591	1.2359	2.7135	1.0005
2.7986	0.8356	1.7337	0.8556	5.6968	0.2193	1.1727	0.1543	4.1756	1.388	3.6444	0.3786	2.6816	0.3827	0.7494	1.057	1.0415	0.1143	0.198	0.493	0.8684	0.4753	0.9399	1.2053	2.6701	0.9775
2.7448	0.8224	1.7108	0.8387	5.6119	0.2139	1.142	0.1484	4.1212	1.3605	3.5927	0.371	2.6424	0.3728	0.724	1.0263	1.013	0.1098	0.1895	0.4778	0.843	0.4659	0.9211	1.1756	2.6275	0.9551
2.6921	0.8095	1.6881	0.8221	5.5283	0.2086	1.1121	0.1427	4.0676	1.3336	3.5417	0.3635	2.6039	0.3631	0.6994	0.9966	0.9852	0.1055	0.1814	0.4631	0.8183	0.4567	0.9026	1.1466	2.5855	0.9331
2.6404	0.7967	1.6657	0.8058	5.4459	0.2034	1.083	0.1372	4.0146	1.3072	3.4915	0.3562	2.5658	0.3537	0.6757	0.9677	0.9583	0.1013	0.1736	0.4489	0.7944	0.4477	0.8846	1.1182	2.5442	0.9117
2.5897	0.7842	1.6437	0.7898	5.3647	0.1984	1.0546	0.1319	3.9624	1.2813	3.442	0.349	2.5284	0.3445	0.6528	0.9396	0.932	0.0974	0.1661	0.4351	0.7711	0.4388	0.8668	1.0906	2.5035	0.8907
2.54	0.7718	1.6219	0.7742	5.2847	0.1935	1.027	0.1269	3.9108	1.2559	3.3931	0.3419	2.4915	0.3355	0.6307	0.9124	0.9065	0.0935	0.159	0.4217	0.7485	0.4301	0.8495	1.0637	2.4635	0.8702
2.4913	0.7597	1.6004	0.7589	5.2059	0.1887	1.0001	0.122	3.8599	1.2311	3.345	0.335	2.4551	0.3268	0.6093	0.886	0.8816	0.0899	0.1522	0.4087	0.7266	0.4216	0.8325	1.0374	2.4241	0.8502
2.4434	0.7477	1.5792	0.7438	5.1283	0.1841	0.9738	0.1173	3.8097	1.2067	3.2976	0.3282	2.4193	0.3183	0.5887	0.8603	0.8575	0.0864	0.1456	0.3961	0.7054	0.4132	0.8158	1.0118	2.3854	0.8307
2.3965	0.736	1.5583	0.7291	5.0519	0.1795	0.9483	0.1128	3.7601	1.1828	3.2508	0.3216	2.3839	0.3101	0.5687	0.8354	0.834	0.083	0.1394	0.3839	0.6847	0.4051	0.7994	0.9869	2.3473	0.8116
2.3505	0.7244	1.5377	0.7147	4.9766	0.1751	0.9235	0.1084	3.7111	1.1594	3.2047	0.3151	2.3491	0.302	0.5494	0.8111	0.8111	0.0797	0.1334	0.3721	0.6647	0.397	0.7834	0.9625	2.3098	0.7929
2.3054	0.713	1.5173	0.7005	4.9024	0.1708	0.8993	0.1043	3.6628	1.1364	3.1592	0.3087	2.3149	0.2942	0.5308	0.7876	0.7889	0.0766	0.1276	0.3607	0.6452	0.3892	0.7677	0.9387	2.2729	0.7747
2.2611	0.7017	1.4972	0.6867	4.8293	0.1665	0.8757	0.1003	3.6152	1.1139	3.1144	0.3025	2.2811	0.2865	0.5128	0.7648	0.7673	0.0736	0.1222	0.3496	0.6263	0.3815	0.7523	0.9155	2.2366	0.7569
2.2177	0.6907	1.4774	0.6731	4.7573	0.1624	0.8528	0.0964	3.5681	1.0919	3.0702	0.2964	2.2478	0.2791	0.4954	0.7426	0.7463	0.0707	0.1169	0.3388	0.608	0.3739	0.7373	0.8929	2.2008	0.7395
2.1751	0.6798	1.4578	0.6597	4.6864	0.1584	0.8304	0.0927	3.5217	1.0702	3.0267	0.2904	2.2149	0.2718	0.4786	0.7211	0.7258	0.0679	0.1119	0.3284	0.5902	0.3665	0.7225	0.8709	2.1657	0.7225
2.1334	0.6691	1.4385	0.6467	4.6166	0.1545	0.8087	0.0891	3.4758	1.049	2.9838	0.2845	2.1826	0.2648	0.4624	0.7002	0.706	0.0653	0.1071	0.3183	0.5729	0.3593	0.708	0.8494	2.1311	0.7059
2.0924	0.6586	1.4194	0.6339	4.5477	0.1507	0.7875	0.0857	3.4306	1.0283	2.9414	0.2788	2.1508	0.2579	0.4467	0.6799	0.6866	0.0627	0.1025	0.3085	0.5562	0.3521	0.6938	0.8284	2.097	0.6897
2.0522	0.6482	1.4006	0.6213	4.4799	0.147	0.7669	0.0824	3.3859	1.0079	2.8997	0.2732	2.1194	0.2512	0.4316	0.6602	0.6678	0.0602	0.0981	0.299	0.5399	0.3452	0.6799	0.808	2.0635	0.6738
2.0128	0.638	1.3821	0.609	4.4132	0.1433	0.7468	0.0792	3.3419	0.9879	2.8586	0.2676	2.0884	0.2447	0.417	0.6411	0.6495	0.0579	0.0939	0.2898	0.5241	0.3383	0.6663	0.788	2.0305	0.6583
1.9742	0.6279	1.3638	0.5969	4.3474	0.1398	0.7272	0.0762	3.2984	0.9684	2.818	0.2622	2.0579	0.2383	0.4028	0.6225	0.6317	0.0556	0.0898	0.2809	0.5088	0.3316	0.653	0.7686	1.9981	0.6432
1.9363	0.618	1.3457	0.5851	4.2826	0.1364	0.7082	0.0733	3.2554	0.9492	2.7781	0.2569	2.0279	0.2321	0.3892	0.6045	0.6144	0.0534	0.086	0.2722	0.4939	0.3251	0.6399	0.7496	1.9662	0.6284
1.8991	0.6083	1.3279	0.5735	4.2187	0.133	0.6896	0.0704	3.2131	0.9304	2.7387	0.2517	1.9983	0.2261	0.376	0.5869	0.5976	0.0513	0.0823	0.2639	0.4794	0.3186	0.6271	0.7311	1.9347	0.6139
1.8626	0.5987	1.3103	0.5622	4.1558	0.1297	0.6715	0.0677	3.1713	0.912	2.6998	0.2467	1.9691	0.2202	0.3632	0.5699	0.5812	0.0493	0.0787	0.2558	0.4654	0.3123	0.6145	0.713	1.9038	0.5998
1.8269	0.5893	1.293	0.5511	4.0939	0.1265	0.6539	0.0651	3.13	0.8939	2.6615	0.2417	1.9404	0.2145	0.3509	0.5534	0.5653	0.0474	0.0754	0.2479	0.4518	0.3061	0.6022	0.6954	1.8734	0.586
1.7918	0.58	1.2758	0.5401	4.0329	0.1234	0.6368	0.0626	3.0892	0.8762	2.6238	0.2368	1.912	0.2089	0.339	0.5374	0.5498	0.0455	0.0721	0.2403	0.4385	0.3001	0.5901	0.6783	1.8435	0.5726
1.7574	0.5709	1.2589	0.5294	3.9728	0.1203	0.6201	0.0602	3.049	0.8589	2.5866	0.232	1.8841	0.2035	0.3275	0.5218	0.5347	0.0437	0.069	0.2329	0.4257	0.2941	0.5783	0.6615	1.814	0.5594
1.7237	0.5619	1.2423	0.519	3.9135	0.1174	0.6039	0.0579	3.0093	0.8419	2.5499	0.2273	1.8566	0.1982	0.3164	0.5067	0.5201	0.042	0.0661	0.2257	0.4133	0.2883	0.5667	0.6452	1.785	0.5466
1.6906	0.5531	1.2258	0.5087	3.8552	0.1145	0.5881	0.0557	2.9702	0.8252	2.5137	0.2227	1.8295	0.1931	0.3057	0.492	0.5058	0.0404	0.0632	0.2188	0.4012	0.2826	0.5554	0.6292	1.7565	0.534
1.6581	0.5443	1.2096	0.4986	3.7977	0.1116	0.5727	0.0535	2.9315	0.8089	2.4781	0.2182	1.8028	0.1881	0.2954	0.4777	0.492	0.0388	0.0605	0.212	0.3894	0.277	0.5443	0.6137	1.7285	0.5217
1.6263	0.5358	1.1936	0.4887	3.7411	0.1089	0.5577	0.0515	2.8934	0.7928	2.4429	0.2138	1.7765	0.1832	0.2853	0.4639	0.4785	0.0373	0.0579	0.2055	0.378	0.2715	0.5334	0.5986	1.7008	0.5097
1.595	0.5273	1.1777	0.4791	3.6854	0.1062	0.543	0.0495	2.8557	0.7771	2.4083	0.2095	1.7506	0.1784	0.2757	0.4504	0.4654	0.0358	0.0554	0.1992	0.367	0.2661	0.5227	0.5838	1.6737	0.498
1.5644	0.519	1.1621	0.4696	3.6304	0.1036	0.5288	0.0476	2.8185	0.7618	2.3741	0.2053	1.725	0.1738	0.2663	0.4374	0.4526	0.0344	0.053	0.1931	0.3562	0.2609	0.5122	0.5694	1.6469	0.4866
1.5344	0.5109	1.1468	0.4603	3.5763	0.101	0.515	0.0458	2.7819	0.7467	2.3404	0.2011	1.6998	0.1693	0.2573	0.4247	0.4402	0.0331	0.0508	0.1871	0.3458	0.2557	0.5019	0.5553	1.6206	0.4754
1.5049	0.5028	1.1316	0.4512	3.523	0.0985	0.5015	0.044	2.7456	0.7319	2.3072	0.1971	1.675	0.1649	0.2486	0.4124	0.4282	0.0318	0.0486	0.1814	0.3357	0.2506	0.4919	0.5416	1.5947	0.4644
1.476	0.4949	1.1166	0.4422	3.4705	0.0961	0.4883	0.0423	2.7099	0.7174	2.2745	0.1931	1.6506	0.1606	0.2402	0.4004	0.4165	0.0305	0.0465	0.1758	0.3259	0.2457	0.482	0.5282	1.5692	0.4538
1.4477	0.4871	1.1018	0.4335	3.4187	0.0937	0.4755	0.0407	2.6746	0.7032	2.2422	0.1892	1.6265	0.1564	0.232	0.3888	0.405	0.0293	0.0445	0.1704	0.3163	0.2408	0.4724	0.5152	1.5441	0.4433
1.4199	0.4794	1.0872	0.4249	3.3678	0.0914	0.4631	0.0391	2.6398	0.6893	2.2104	0.1854	1.6027	0.1524	0.2242	0.3776	0.3939	0.0282	0.0426	0.1651	0.3071	0.2361	0.4629	0.5025	1.5195	0.4331
1.3926	0.4719	1.0728	0.4165	3.3176	0.0891	0.4509	0.0376	2.6055	0.6756	2.1791	0.1816	1.5793	0.1484	0.2166	0.3666	0.3832	0.0271	0.0407	0.16	0.2981	0.2314	0.4536	0.4901	1.4952	0.4232
1.3659	0.4644	1.0586	0.4082	3.2681	0.0869	0.4391	0.0362	2.5716	0.6622	2.1482	0.1779	1.5563	0.1446	0.2092	0.356	0.3727	0.026	0.039	0.1551	0.2893	0.2268	0.4445	0.478	1.4713	0.4135
1.3397	0.4571	1.0446	0.4001	3.2194	0.0848	0.4276	0.0348	2.5381	0.6491	2.1177	0.1744	1.5335	0.1408	0.2021	0.3457	0.3625	0.025	0.0373	0.1503	0.2809	0.2223	0.4356	0.4662	1.4478	0.404
1.314	0.4499	1.0307	0.3922	3.1714	0.0827	0.4164	0.0334	2.5051	0.6363	2.0877	0.1708	1.5112	0.1371	0.1953	0.3357	0.3525	0.024	0.0357	0.1457	0.2727	0.2179	0.4269	0.4546	1.4247	0.3947
1.2887	0.4429	1.0171	0.3845	3.1241	0.0807	0.4055	0.0322	2.4724	0.6237	2.058	0.1674	1.4891	0.1336	0.1887	0.3259	0.3429	0.0231	0.0342	0.1412	0.2647	0.2136	0.4184	0.4434	1.4019	0.3856
1.264	0.4359	1.0036	0.3768	3.0776	0.0787	0.3949	0.0309	2.4403	0.6113	2.0289	0.164	1.4674	0.1301	0.1823	0.3165	0.3335	0.0222	0.0327	0.1369	0.2569	0.2094	0.41	0.4325	1.3795	0.3767
1.2397	0.429	0.9903	0.3694	3.0317	0.0767	0.3845	0.0297	2.4085	0.5992	2.0001	0.1607	1.4459	0.1267	0.1761	0.3073	0.3243	0.0213	0.0313	0.1327	0.2494	0.2052	0.4018	0.4218	1.3575	0.3681
1.2159	0.4223	0.9772	0.3621	2.9865	0.0748	0.3745	0.0286	2.3772	0.5874	1.9717	0.1574	1.4248	0.1234	0.1701	0.2984	0.3155	0.0205	0.03	0.1286	0.2421	0.2011	0.3937	0.4114	1.3358	0.3596
1.1926	0.4156	0.9643	0.3549	2.942	0.073	0.3647	0.0275	2.3462	0.5757	1.9437	0.1543	1.404	0.1202	0.1643	0.2898	0.3068	0.0197	0.0287	0.1246	0.235	0.1972	0.3858	0.4012	1.3144	0.3513
1.1697	0.4091	0.9515	0.3479	2.8981	0.0712	0.3551	0.0264	2.3157	0.5643	1.9162	0.1511	1.3835	0.1171	0.1588	0.2814	0.2984	0.0189	0.0274	0.1208	0.2282	0.1933	0.3781	0.3913	1.2934	0.3433
1.1472	0.4026	0.9389	0.341	2.8549	0.0694	0.3458	0.0254	2.2855	0.5532	1.889	0.1481	1.3633	0.1141	0.1534	0.2732	0.2902	0.0181	0.0263	0.1171	0.2215	0.1894	0.3705	0.3817	1.2728	0.3354
1.1252	0.3963	0.9264	0.3342	2.8124	0.0677	0.3367	0.0244	2.2558	0.5422	1.8622	0.1451	1.3434	0.1111	0.1482	0.2653	0.2823	0.0174	0.0251	0.1135	0.215	0.1857	0.3631	0.3722	1.2524	0.3277
1.1036	0.39	0.9142	0.3276	2.7704	0.066	0.3279	0.0235	2.2264	0.5315	1.8358	0.1422	1.3238	0.1082	0.1432	0.2576	0.2745	0.0168	0.0241	0.11	0.2087	0.182	0.3558	0.363	1.2324	0.3201
1.0824	0.3839	0.9021	0.3211	2.7292	0.0644	0.3193	0.0226	2.1975	0.5209	1.8097	0.1393	1.3045	0.1054	0.1383	0.2501	0.267	0.0161	0.023	0.1066	0.2026	0.1784	0.3487	0.3541	1.2127	0.3128
1.0616	0.3779	0.8901	0.3148	2.6885	0.0628	0.311	0.0217	2.1689	0.5106	1.7841	0.1365	1.2855	0.1027	0.1336	0.2429	0.2597	0.0155	0.022	0.1033	0.1967	0.1749	0.3417	0.3453	1.1933	0.3056
1.0412	0.3719	0.8783	0.3085	2.6484	0.0613	0.3028	0.0209	2.1406	0.5005	1.7588	0.1337	1.2667	0.1	0.1291	0.2358	0.2526	0.0149	0.0211	0.1002	0.1909	0.1714	0.3349	0.3368	1.1743	0.2986
1.0212	0.366	0.8667	0.3024	2.6089	0.0598	0.2949	0.0201	2.1128	0.4906	1.7338	0.131	1.2482	0.0974	0.1247	0.229	0.2457	0.0143	0.0202	0.0971	0.1853	0.168	0.3282	0.3285	1.1555	0.2917
1.0016	0.3603	0.8552	0.2964	2.57	0.0583	0.2872	0.0193	2.0853	0.4809	1.7092	0.1284	1.23	0.0949	0.1205	0.2224	0.2389	0.0137	0.0193	0.0941	0.1799	0.1647	0.3216	0.3204	1.137	0.285
0.9824	0.3546	0.8439	0.2906	2.5317	0.0568	0.2796	0.0186	2.0581	0.4714	1.685	0.1258	1.212	0.0924	0.1164	0.2159	0.2324	0.0132	0.0185	0.0912	0.1746	0.1614	0.3151	0.3125	1.1189	0.2784
0.9635	0.349	0.8327	0.2848	2.494	0.0554	0.2723	0.0179	2.0313	0.462	1.6611	0.1232	1.1943	0.09	0.1125	0.2097	0.226	0.0127	0.0177	0.0884	0.1695	0.1582	0.3088	0.3048	1.101	0.272
0.945	0.3435	0.8217	0.2792	2.4568	0.0541	0.2652	0.0172	2.0049	0.4529	1.6375	0.1208	1.1769	0.0877	0.1087	0.2036	0.2198	0.0122	0.0169	0.0857	0.1646	0.1551	0.3026	0.2972	1.0834	0.2658
0.9269	0.3381	0.8108	0.2736	2.4202	0.0527	0.2582	0.0165	1.9788	0.4439	1.6143	0.1183	1.1597	0.0854	0.105	0.1977	0.2138	0.0117	0.0162	0.083	0.1597	0.152	0.2966	0.2899	1.0661	0.2597
0.9091	0.3328	0.8001	0.2682	2.3841	0.0514	0.2515	0.0159	1.953	0.4351	1.5914	0.1159	1.1428	0.0832	0.1014	0.192	0.208	0.0112	0.0155	0.0805	0.1551	0.149	0.2906	0.2827	1.0491	0.2537
0.8916	0.3276	0.7895	0.2629	2.3486	0.0502	0.2449	0.0153	1.9276	0.4265	1.5688	0.1136	1.1261	0.081	0.098	0.1864	0.2023	0.0108	0.0148	0.078	0.1505	0.1461	0.2848	0.2758	1.0323	0.2479
0.8745	0.3224	0.779	0.2577	2.3136	0.0489	0.2385	0.0147	1.9025	0.4181	1.5466	0.1113	1.1097	0.0789	0.0947	0.181	0.1967	0.0104	0.0142	0.0756	0.1461	0.1432	0.2791	0.2689	1.0158	0.2422
0.8577	0.3173	0.7687	0.2526	2.2791	0.0477	0.2322	0.0141	1.8778	0.4098	1.5246	0.109	1.0935	0.0769	0.0914	0.1757	0.1913	0.01	0.0136	0.0733	0.1418	0.1403	0.2735	0.2623	0.9996	0.2366
0.8413	0.3123	0.7585	0.2476	2.2451	0.0465	0.2261	0.0136	1.8533	0.4017	1.503	0.1068	1.0775	0.0749	0.0883	0.1707	0.1861	0.0096	0.013	0.071	0.1377	0.1376	0.268	0.2558	0.9836	0.2312
0.8251	0.3074	0.7485	0.2427	2.2116	0.0454	0.2202	0.013	1.8292	0.3937	1.4817	0.1047	1.0618	0.0729	0.0854	0.1657	0.181	0.0092	0.0124	0.0688	0.1337	0.1348	0.2627	0.2495	0.9679	0.2259
0.8093	0.3026	0.7386	0.2379	2.1787	0.0443	0.2144	0.0125	1.8054	0.3859	1.4607	0.1026	1.0463	0.071	0.0825	0.1609	0.176	0.0088	0.0119	0.0667	0.1298	0.1322	0.2574	0.2434	0.9524	0.2207
0.7937	0.2978	0.7288	0.2332	2.1462	0.0432	0.2088	0.0121	1.7819	0.3783	1.44	0.1005	1.031	0.0692	0.0797	0.1562	0.1712	0.0085	0.0114	0.0647	0.126	0.1295	0.2523	0.2373	0.9372	0.2156
0.7785	0.2931	0.7191	0.2286	2.1142	0.0421	0.2033	0.0116	1.7587	0.3708	1.4195	0.0985	1.0159	0.0674	0.077	0.1517	0.1665	0.0082	0.0109	0.0627	0.1223	0.127	0.2472	0.2315	0.9222	0.2106
0.7636	0.2885	0.7096	0.224	2.0827	0.0411	0.198	0.0112	1.7358	0.3634	1.3994	0.0965	1.0011	0.0656	0.0744	0.1473	0.162	0.0078	0.0104	0.0607	0.1187	0.1245	0.2423	0.2258	0.9075	0.2058
0.7489	0.2839	0.7002	0.2196	2.0516	0.0401	0.1928	0.0107	1.7132	0.3562	1.3796	0.0945	0.9865	0.0639	0.0718	0.143	0.1575	0.0075	0.01	0.0589	0.1152	0.122	0.2374	0.2202	0.893	0.2011
0.7345	0.2795	0.6909	0.2153	2.021	0.0391	0.1878	0.0103	1.6909	0.3492	1.36	0.0926	0.9721	0.0623	0.0694	0.1389	0.1532	0.0072	0.0096	0.0571	0.1118	0.1196	0.2326	0.2148	0.8787	0.1964
0.7204	0.2751	0.6818	0.211	1.9909	0.0381	0.1829	0.0099	1.6689	0.3423	1.3407	0.0907	0.9579	0.0607	0.067	0.1349	0.149	0.0069	0.0092	0.0553	0.1086	0.1172	0.228	0.2095	0.8647	0.1919
0.7066	0.2707	0.6727	0.2068	1.9612	0.0372	0.1781	0.0095	1.6472	0.3355	1.3217	0.0889	0.9439	0.0591	0.0648	0.131	0.1449	0.0067	0.0088	0.0536	0.1054	0.1149	0.2234	0.2043	0.8509	0.1875
0.693	0.2665	0.6638	0.2027	1.932	0.0362	0.1734	0.0092	1.6258	0.3289	1.3029	0.0871	0.9301	0.0575	0.0626	0.1272	0.141	0.0064	0.0084	0.052	0.1023	0.1126	0.2189	0.1992	0.8373	0.1832
0.6797	0.2623	0.655	0.1987	1.9032	0.0353	0.1689	0.0088	1.6046	0.3223	1.2844	0.0854	0.9166	0.0561	0.0605	0.1235	0.1371	0.0062	0.008	0.0504	0.0993	0.1104	0.2146	0.1943	0.8239	0.179
0.6667	0.2582	0.6464	0.1948	1.8748	0.0345	0.1644	0.0085	1.5837	0.316	1.2662	0.0836	0.9032	0.0546	0.0584	0.1199	0.1333	0.0059	0.0077	0.0488	0.0964	0.1082	0.2103	0.1895	0.8107	0.1749
0.6539	0.2541	0.6378	0.1909	1.8469	0.0336	0.1601	0.0081	1.5631	0.3097	1.2483	0.0819	0.89	0.0532	0.0564	0.1164	0.1297	0.0057	0.0073	0.0473	0.0936	0.1061	0.206	0.1848	0.7978	0.1709
0.6413	0.2501	0.6294	0.1871	1.8194	0.0328	0.1559	0.0078	1.5428	0.3036	1.2306	0.0803	0.877	0.0518	0.0545	0.1131	0.1261	0.0055	0.007	0.0459	0.0909	0.104	0.2019	0.1803	0.785	0.1669
0.629	0.2461	0.621	0.1834	1.7922	0.032	0.1518	0.0075	1.5227	0.2976	1.2131	0.0787	0.8642	0.0505	0.0527	0.1098	0.1227	0.0053	0.0067	0.0444	0.0882	0.1019	0.1979	0.1758	0.7725	0.1631
0.6169	0.2423	0.6128	0.1798	1.7655	0.0312	0.1479	0.0072	1.5029	0.2917	1.1959	0.0771	0.8516	0.0491	0.0509	0.1066	0.1193	0.005	0.0064	0.0431	0.0856	0.0999	0.1939	0.1715	0.7601	0.1593
0.6051	0.2385	0.6047	0.1762	1.7392	0.0304	0.144	0.007	1.4833	0.2859	1.1789	0.0755	0.8392	0.0479	0.0492	0.1035	0.116	0.0048	0.0062	0.0418	0.0831	0.0979	0.19	0.1673	0.748	0.1557
0.5935	0.2347	0.5967	0.1727	1.7133	0.0297	0.1402	0.0067	1.464	0.2802	1.1622	0.074	0.8269	0.0466	0.0475	0.1005	0.1129	0.0047	0.0059	0.0405	0.0807	0.096	0.1862	0.1631	0.736	0.1521
0.5821	0.231	0.5888	0.1693	1.6877	0.0289	0.1365	0.0064	1.4449	0.2747	1.1457	0.0725	0.8148	0.0454	0.0459	0.0976	0.1098	0.0045	0.0056	0.0392	0.0783	0.0941	0.1825	0.1591	0.7243	0.1486
0.5709	0.2274	0.581	0.166	1.6626	0.0282	0.133	0.0062	1.4261	0.2692	1.1295	0.071	0.8029	0.0442	0.0443	0.0948	0.1068	0.0043	0.0054	0.038	0.076	0.0922	0.1788	0.1552	0.7127	0.1452
0.5599	0.2238	0.5733	0.1627	1.6378	0.0275	0.1295	0.006	1.4076	0.2639	1.1135	0.0696	0.7912	0.0431	0.0428	0.092	0.1038	0.0041	0.0052	0.0368	0.0738	0.0904	0.1752	0.1513	0.7013	0.1419
0.5492	0.2203	0.5657	0.1595	1.6134	0.0269	0.1261	0.0057	1.3893	0.2587	1.0977	0.0682	0.7797	0.042	0.0414	0.0893	0.101	0.004	0.0049	0.0357	0.0716	0.0886	0.1717	0.1476	0.6901	0.1386
0.5386	0.2168	0.5582	0.1563	1.5893	0.0262	0.1228	0.0055	1.3712	0.2536	1.0821	0.0668	0.7683	0.0409	0.04	0.0868	0.0982	0.0038	0.0047	0.0346	0.0695	0.0868	0.1683	0.144	0.6791	0.1354
0.5283	0.2134	0.5508	0.1532	1.5656	0.0255	0.1196	0.0053	1.3533	0.2485	1.0667	0.0655	0.7571	0.0398	0.0386	0.0842	0.0955	0.0037	0.0045	0.0335	0.0675	0.0851	0.1649	0.1404	0.6682	0.1323
0.5181	0.21	0.5435	0.1502	1.5423	0.0249	0.1164	0.0051	1.3357	0.2436	1.0516	0.0641	0.746	0.0388	0.0373	0.0818	0.0929	0.0035	0.0043	0.0325	0.0655	0.0834	0.1616	0.1369	0.6576	0.1293
0.5082	0.2067	0.5363	0.1472	1.5193	0.0243	0.1134	0.0049	1.3183	0.2388	1.0367	0.0628	0.7351	0.0378	0.036	0.0794	0.0904	0.0034	0.0042	0.0315	0.0636	0.0818	0.1584	0.1336	0.6471	0.1263
0.4984	0.2035	0.5292	0.1443	1.4967	0.0237	0.1104	0.0047	1.3012	0.2341	1.022	0.0616	0.7244	0.0368	0.0348	0.0771	0.0879	0.0032	0.004	0.0305	0.0617	0.0802	0.1552	0.1303	0.6367	0.1234
0.4889	0.2003	0.5222	0.1414	1.4744	0.0231	0.1075	0.0045	1.2842	0.2294	1.0075	0.0603	0.7138	0.0358	0.0336	0.0749	0.0855	0.0031	0.0038	0.0296	0.0599	0.0786	0.1521	0.127	0.6265	0.1205
0.4795	0.1971	0.5153	0.1386	1.4524	0.0225	0.1047	0.0044	1.2675	0.2249	0.9932	0.0591	0.7034	0.0349	0.0325	0.0727	0.0832	0.003	0.0036	0.0287	0.0582	0.077	0.1491	0.1239	0.6165	0.1178
0.4703	0.194	0.5084	0.1359	1.4307	0.022	0.102	0.0042	1.251	0.2204	0.9791	0.0579	0.6931	0.034	0.0314	0.0706	0.0809	0.0029	0.0035	0.0278	0.0565	0.0755	0.1461	0.1208	0.6067	0.1151
0.4612	0.1909	0.5017	0.1332	1.4094	0.0214	0.0993	0.004	1.2347	0.2161	0.9652	0.0567	0.683	0.0331	0.0303	0.0686	0.0787	0.0028	0.0033	0.027	0.0548	0.074	0.1431	0.1179	0.597	0.1124
0.4524	0.1879	0.4951	0.1306	1.3884	0.0209	0.0967	0.0039	1.2187	0.2118	0.9515	0.0556	0.673	0.0323	0.0293	0.0666	0.0765	0.0027	0.0032	0.0261	0.0532	0.0725	0.1403	0.115	0.5874	0.1098
0.4437	0.185	0.4885	0.128	1.3677	0.0204	0.0942	0.0037	1.2028	0.2076	0.938	0.0545	0.6632	0.0314	0.0283	0.0647	0.0744	0.0026	0.0031	0.0253	0.0517	0.0711	0.1375	0.1121	0.5781	0.1073
0.4352	0.1821	0.482	0.1254	1.3473	0.0199	0.0917	0.0036	1.1871	0.2035	0.9247	0.0534	0.6535	0.0306	0.0274	0.0628	0.0724	0.0025	0.0029	0.0245	0.0502	0.0697	0.1347	0.1093	0.5688	0.1048
0.4268	0.1792	0.4757	0.123	1.3272	0.0194	0.0893	0.0034	1.1717	0.1995	0.9116	0.0523	0.644	0.0298	0.0264	0.061	0.0704	0.0024	0.0028	0.0238	0.0487	0.0683	0.132	0.1066	0.5597	0.1024
0.4186	0.1764	0.4694	0.1205	1.3074	0.0189	0.0869	0.0033	1.1564	0.1955	0.8987	0.0512	0.6346	0.029	0.0255	0.0592	0.0685	0.0023	0.0027	0.0231	0.0473	0.067	0.1294	0.104	0.5508	0.1001
0.4106	0.1736	0.4631	0.1181	1.288	0.0185	0.0847	0.0032	1.1414	0.1916	0.8859	0.0502	0.6253	0.0283	0.0247	0.0575	0.0666	0.0022	0.0026	0.0223	0.0459	0.0656	0.1268	0.1014	0.542	0.0978
0.4027	0.1709	0.457	0.1158	1.2688	0.018	0.0825	0.0031	1.1265	0.1878	0.8734	0.0492	0.6162	0.0275	0.0238	0.0558	0.0648	0.0021	0.0025	0.0217	0.0445	0.0643	0.1242	0.0989	0.5333	0.0955
0.395	0.1682	0.451	0.1135	1.2498	0.0176	0.0803	0.0029	1.1119	0.1841	0.861	0.0482	0.6072	0.0268	0.023	0.0542	0.063	0.002	0.0023	0.021	0.0432	0.0631	0.1217	0.0965	0.5248	0.0933
0.3874	0.1655	0.445	0.1113	1.2312	0.0171	0.0782	0.0028	1.0974	0.1805	0.8488	0.0472	0.5983	0.0261	0.0222	0.0526	0.0613	0.0019	0.0022	0.0203	0.042	0.0618	0.1193	0.0941	0.5164	0.0912
0.38	0.1629	0.4391	0.1091	1.2129	0.0167	0.0761	0.0027	1.0831	0.1769	0.8367	0.0463	0.5896	0.0255	0.0215	0.0511	0.0596	0.0019	0.0021	0.0197	0.0407	0.0606	0.1169	0.0918	0.5082	0.0891
0.3727	0.1604	0.4333	0.1069	1.1948	0.0163	0.0741	0.0026	1.069	0.1734	0.8249	0.0453	0.581	0.0248	0.0208	0.0496	0.0579	0.0018	0.0021	0.0191	0.0395	0.0594	0.1146	0.0895	0.5001	0.087
0.3655	0.1578	0.4275	0.1048	1.177	0.0159	0.0722	0.0025	1.0551	0.17	0.8132	0.0444	0.5725	0.0241	0.0201	0.0482	0.0564	0.0017	0.002	0.0185	0.0384	0.0582	0.1123	0.0873	0.4921	0.085
0.3585	0.1553	0.4219	0.1027	1.1594	0.0155	0.0703	0.0024	1.0414	0.1666	0.8016	0.0435	0.5642	0.0235	0.0194	0.0468	0.0548	0.0016	0.0019	0.018	0.0373	0.0571	0.11	0.0852	0.4842	0.0831
0.3516	0.1529	0.4163	0.1007	1.1421	0.0151	0.0685	0.0023	1.0278	0.1633	0.7903	0.0426	0.5559	0.0229	0.0187	0.0454	0.0533	0.0016	0.0018	0.0174	0.0362	0.0559	0.1078	0.0831	0.4765	0.0812
0.3449	0.1505	0.4108	0.0987	1.1251	0.0147	0.0667	0.0022	1.0144	0.1601	0.7791	0.0418	0.5478	0.0223	0.0181	0.0441	0.0519	0.0015	0.0017	0.0169	0.0351	0.0548	0.1057	0.081	0.4688	0.0793
0.3382	0.1481	0.4053	0.0967	1.1083	0.0144	0.0649	0.0021	1.0012	0.1569	0.768	0.0409	0.5398	0.0217	0.0175	0.0428	0.0504	0.0015	0.0017	0.0163	0.0341	0.0537	0.1036	0.079	0.4614	0.0775
0.3317	0.1458	0.4	0.0948	1.0918	0.014	0.0632	0.0021	0.9882	0.1538	0.7571	0.0401	0.5319	0.0212	0.0169	0.0416	0.0491	0.0014	0.0016	0.0158	0.0331	0.0527	0.1015	0.0771	0.454	0.0757
0.3254	0.1435	0.3947	0.0929	1.0755	0.0137	0.0616	0.002	0.9753	0.1508	0.7464	0.0393	0.5242	0.0206	0.0163	0.0404	0.0477	0.0013	0.0015	0.0154	0.0321	0.0516	0.0994	0.0752	0.4467	0.074
0.3191	0.1412	0.3894	0.0911	1.0595	0.0133	0.06	0.0019	0.9627	0.1478	0.7358	0.0385	0.5165	0.0201	0.0158	0.0392	0.0464	0.0013	0.0014	0.0149	0.0312	0.0506	0.0975	0.0733	0.4396	0.0723
0.313	0.139	0.3843	0.0893	1.0437	0.013	0.0584	0.0018	0.9501	0.1448	0.7254	0.0377	0.509	0.0196	0.0152	0.0381	0.0451	0.0012	0.0014	0.0144	0.0303	0.0496	0.0955	0.0715	0.4326	0.0706
0.307	0.1368	0.3792	0.0875	1.0282	0.0127	0.0569	0.0018	0.9378	0.142	0.7151	0.037	0.5015	0.0191	0.0147	0.037	0.0439	0.0012	0.0013	0.014	0.0294	0.0486	0.0936	0.0697	0.4257	0.069
0.3011	0.1347	0.3742	0.0858	1.0128	0.0124	0.0554	0.0017	0.9256	0.1392	0.7049	0.0362	0.4942	0.0186	0.0142	0.0359	0.0427	0.0011	0.0013	0.0136	0.0285	0.0477	0.0917	0.068	0.4189	0.0674
0.2953	0.1325	0.3692	0.0841	0.9977	0.0121	0.0539	0.0016	0.9135	0.1364	0.6949	0.0355	0.487	0.0181	0.0137	0.0349	0.0415	0.0011	0.0012	0.0131	0.0277	0.0467	0.0899	0.0663	0.4122	0.0658
0.2896	0.1305	0.3643	0.0824	0.9829	0.0118	0.0525	0.0016	0.9016	0.1337	0.6851	0.0348	0.4799	0.0176	0.0133	0.0339	0.0404	0.0011	0.0012	0.0127	0.0269	0.0458	0.0881	0.0647	0.4056	0.0643
0.2841	0.1284	0.3595	0.0808	0.9682	0.0115	0.0511	0.0015	0.8899	0.1311	0.6753	0.0341	0.4729	0.0172	0.0128	0.0329	0.0393	0.001	0.0011	0.0123	0.0261	0.0449	0.0863	0.0631	0.3991	0.0629
0.2786	0.1264	0.3547	0.0792	0.9538	0.0112	0.0498	0.0015	0.8783	0.1285	0.6658	0.0334	0.466	0.0167	0.0124	0.0319	0.0382	0.001	0.0011	0.012	0.0253	0.044	0.0846	0.0615	0.3927	0.0614
0.2733	0.1244	0.35	0.0776	0.9396	0.0109	0.0485	0.0014	0.8669	0.1259	0.6563	0.0327	0.4592	0.0163	0.012	0.031	0.0372	0.0009	0.001	0.0116	0.0246	0.0431	0.0829	0.06	0.3864	0.06
0.268	0.1224	0.3454	0.0761	0.9256	0.0106	0.0472	0.0013	0.8556	0.1234	0.647	0.032	0.4525	0.0158	0.0116	0.0301	0.0361	0.0009	0.001	0.0112	0.0239	0.0423	0.0812	0.0585	0.3803	0.0586
0.2629	0.1205	0.3408	0.0746	0.9118	0.0104	0.046	0.0013	0.8444	0.121	0.6378	0.0314	0.4459	0.0154	0.0112	0.0292	0.0351	0.0009	0.0009	0.0109	0.0232	0.0414	0.0796	0.0571	0.3742	0.0573
0.2578	0.1186	0.3363	0.0731	0.8982	0.0101	0.0448	0.0012	0.8335	0.1186	0.6288	0.0308	0.4394	0.015	0.0108	0.0284	0.0342	0.0008	0.0009	0.0106	0.0225	0.0406	0.078	0.0557	0.3682	0.056
0.2529	0.1167	0.3319	0.0717	0.8848	0.0099	0.0436	0.0012	0.8226	0.1162	0.6199	0.0301	0.433	0.0146	0.0104	0.0276	0.0332	0.0008	0.0009	0.0102	0.0218	0.0398	0.0764	0.0543	0.3623	0.0547
0.248	0.1149	0.3275	0.0702	0.8716	0.0096	0.0425	0.0011	0.8119	0.1139	0.6111	0.0295	0.4266	0.0143	0.0101	0.0268	0.0323	0.0008	0.0008	0.0099	0.0212	0.039	0.0749	0.053	0.3565	0.0534
0.2433	0.1131	0.3231	0.0688	0.8586	0.0094	0.0413	0.0011	0.8013	0.1117	0.6024	0.0289	0.4204	0.0139	0.0097	0.026	0.0315	0.0007	0.0008	0.0096	0.0206	0.0382	0.0734	0.0517	0.3508	0.0522
0.2386	0.1113	0.3188	0.0675	0.8458	0.0092	0.0403	0.0011	0.7909	0.1095	0.5939	0.0284	0.4143	0.0135	0.0094	0.0252	0.0306	0.0007	0.0007	0.0093	0.02	0.0375	0.0719	0.0504	0.3452	0.051
0.234	0.1096	0.3146	0.0661	0.8332	0.0089	0.0392	0.001	0.7806	0.1073	0.5854	0.0278	0.4082	0.0132	0.0091	0.0245	0.0298	0.0007	0.0007	0.009	0.0194	0.0367	0.0705	0.0491	0.3397	0.0498
0.2295	0.1078	0.3105	0.0648	0.8208	0.0087	0.0382	0.001	0.7704	0.1052	0.5771	0.0272	0.4023	0.0128	0.0088	0.0238	0.0289	0.0007	0.0007	0.0088	0.0188	0.036	0.0691	0.0479	0.3343	0.0487
0.2251	0.1061	0.3063	0.0636	0.8085	0.0085	0.0372	0.0009	0.7604	0.1031	0.569	0.0267	0.3964	0.0125	0.0085	0.0231	0.0281	0.0006	0.0007	0.0085	0.0183	0.0353	0.0677	0.0467	0.329	0.0475
0.2208	0.1045	0.3023	0.0623	0.7965	0.0083	0.0362	0.0009	0.7505	0.1011	0.5609	0.0261	0.3906	0.0122	0.0082	0.0224	0.0274	0.0006	0.0006	0.0082	0.0177	0.0346	0.0663	0.0456	0.3237	0.0465
0.2166	0.1028	0.2983	0.0611	0.7846	0.0081	0.0353	0.0009	0.7408	0.0991	0.5529	0.0256	0.3849	0.0119	0.0079	0.0218	0.0266	0.0006	0.0006	0.008	0.0172	0.0339	0.065	0.0445	0.3185	0.0454
0.2124	0.1012	0.2943	0.0598	0.7729	0.0079	0.0343	0.0008	0.7311	0.0971	0.5451	0.0251	0.3793	0.0116	0.0076	0.0211	0.0259	0.0006	0.0006	0.0077	0.0167	0.0332	0.0637	0.0434	0.3134	0.0443
0.2083	0.0996	0.2904	0.0587	0.7614	0.0077	0.0334	0.0008	0.7216	0.0952	0.5374	0.0246	0.3737	0.0113	0.0074	0.0205	0.0252	0.0005	0.0006	0.0075	0.0162	0.0326	0.0624	0.0423	0.3084	0.0433
0.2043	0.098	0.2866	0.0575	0.75	0.0075	0.0326	0.0008	0.7122	0.0933	0.5297	0.0241	0.3683	0.011	0.0071	0.0199	0.0245	0.0005	0.0005	0.0073	0.0157	0.0319	0.0612	0.0412	0.3035	0.0423
0.2004	0.0965	0.2828	0.0564	0.7389	0.0073	0.0317	0.0007	0.7029	0.0914	0.5222	0.0236	0.3629	0.0107	0.0069	0.0194	0.0238	0.0005	0.0005	0.007	0.0153	0.0313	0.06	0.0402	0.2987	0.0414
0.1966	0.095	0.279	0.0552	0.7278	0.0071	0.0309	0.0007	0.6938	0.0896	0.5148	0.0231	0.3576	0.0104	0.0067	0.0188	0.0232	0.0005	0.0005	0.0068	0.0148	0.0307	0.0588	0.0392	0.2939	0.0404
0.1928	0.0935	0.2753	0.0542	0.717	0.007	0.0301	0.0007	0.6848	0.0878	0.5075	0.0227	0.3524	0.0101	0.0064	0.0183	0.0225	0.0005	0.0005	0.0066	0.0144	0.0301	0.0576	0.0383	0.2892	0.0395
0.1891	0.092	0.2717	0.0531	0.7063	0.0068	0.0293	0.0007	0.6758	0.0861	0.5003	0.0222	0.3472	0.0099	0.0062	0.0177	0.0219	0.0004	0.0004	0.0064	0.014	0.0295	0.0564	0.0373	0.2846	0.0386
0.1855	0.0906	0.2681	0.052	0.6958	0.0066	0.0285	0.0006	0.667	0.0844	0.4932	0.0217	0.3422	0.0096	0.006	0.0172	0.0213	0.0004	0.0004	0.0062	0.0136	0.0289	0.0553	0.0364	0.28	0.0377
0.1819	0.0891	0.2645	0.051	0.6854	0.0065	0.0278	0.0006	0.6584	0.0827	0.4862	0.0213	0.3372	0.0094	0.0058	0.0167	0.0207	0.0004	0.0004	0.006	0.0132	0.0283	0.0542	0.0355	0.2755	0.0368
0.1784	0.0877	0.261	0.05	0.6752	0.0063	0.027	0.0006	0.6498	0.0811	0.4793	0.0209	0.3323	0.0091	0.0056	0.0162	0.0202	0.0004	0.0004	0.0058	0.0128	0.0278	0.0531	0.0346	0.2711	0.036
0.175	0.0863	0.2576	0.049	0.6651	0.0061	0.0263	0.0006	0.6413	0.0795	0.4725	0.0205	0.3274	0.0089	0.0054	0.0158	0.0196	0.0004	0.0004	0.0057	0.0124	0.0272	0.052	0.0338	0.2668	0.0351
0.1716	0.085	0.2542	0.048	0.6552	0.006	0.0256	0.0005	0.633	0.0779	0.4658	0.02	0.3226	0.0087	0.0052	0.0153	0.0191	0.0004	0.0004	0.0055	0.0121	0.0267	0.051	0.0329	0.2625	0.0343
0.1683	0.0836	0.2508	0.0471	0.6454	0.0058	0.025	0.0005	0.6248	0.0764	0.4592	0.0196	0.3179	0.0084	0.005	0.0149	0.0186	0.0003	0.0003	0.0053	0.0117	0.0262	0.05	0.0321	0.2583	0.0335
0.1651	0.0823	0.2475	0.0461	0.6358	0.0057	0.0243	0.0005	0.6166	0.0749	0.4527	0.0192	0.3133	0.0082	0.0049	0.0144	0.018	0.0003	0.0003	0.0051	0.0114	0.0256	0.049	0.0313	0.2542	0.0328
0.1619	0.081	0.2442	0.0452	0.6263	0.0056	0.0237	0.0005	0.6086	0.0734	0.4463	0.0189	0.3087	0.008	0.0047	0.014	0.0176	0.0003	0.0003	0.005	0.011	0.0251	0.048	0.0306	0.2502	0.032
0.1588	0.0798	0.241	0.0443	0.617	0.0054	0.0231	0.0005	0.6007	0.0719	0.4399	0.0185	0.3042	0.0078	0.0046	0.0136	0.0171	0.0003	0.0003	0.0048	0.0107	0.0246	0.047	0.0298	0.2462	0.0313
0.1558	0.0785	0.2378	0.0435	0.6078	0.0053	0.0225	0.0004	0.5929	0.0705	0.4337	0.0181	0.2998	0.0076	0.0044	0.0132	0.0166	0.0003	0.0003	0.0047	0.0104	0.0241	0.0461	0.0291	0.2422	0.0306
0.1528	0.0773	0.2346	0.0426	0.5988	0.0052	0.0219	0.0004	0.5851	0.0691	0.4276	0.0177	0.2954	0.0074	0.0042	0.0128	0.0161	0.0003	0.0003	0.0045	0.0101	0.0237	0.0452	0.0283	0.2384	0.0299
0.1498	0.076	0.2315	0.0418	0.5898	0.005	0.0213	0.0004	0.5775	0.0677	0.4215	0.0174	0.2911	0.0072	0.0041	0.0125	0.0157	0.0003	0.0003	0.0044	0.0098	0.0232	0.0443	0.0276	0.2345	0.0292
0.147	0.0748	0.2285	0.0409	0.581	0.0049	0.0207	0.0004	0.57	0.0664	0.4155	0.017	0.2868	0.007	0.004	0.0121	0.0153	0.0003	0.0002	0.0043	0.0095	0.0227	0.0434	0.027	0.2308	0.0285
0.1441	0.0737	0.2254	0.0401	0.5724	0.0048	0.0202	0.0004	0.5626	0.0651	0.4096	0.0167	0.2826	0.0068	0.0038	0.0117	0.0149	0.0003	0.0002	0.0041	0.0092	0.0223	0.0425	0.0263	0.2271	0.0279
0.1414	0.0725	0.2224	0.0393	0.5638	0.0047	0.0197	0.0004	0.5553	0.0638	0.4038	0.0163	0.2785	0.0067	0.0037	0.0114	0.0144	0.0002	0.0002	0.004	0.009	0.0218	0.0417	0.0256	0.2235	0.0272
0.1387	0.0714	0.2195	0.0385	0.5554	0.0046	0.0191	0.0004	0.548	0.0625	0.3981	0.016	0.2744	0.0065	0.0036	0.0111	0.0141	0.0002	0.0002	0.0039	0.0087	0.0214	0.0408	0.025	0.2199	0.0266
0.136	0.0702	0.2166	0.0378	0.5472	0.0044	0.0186	0.0003	0.5409	0.0613	0.3924	0.0157	0.2704	0.0063	0.0035	0.0108	0.0137	0.0002	0.0002	0.0038	0.0084	0.021	0.04	0.0244	0.2164	0.026
0.1334	0.0691	0.2137	0.037	0.539	0.0043	0.0182	0.0003	0.5339	0.0601	0.3869	0.0154	0.2665	0.0061	0.0033	0.0104	0.0133	0.0002	0.0002	0.0036	0.0082	0.0206	0.0392	0.0238	0.2129	0.0254
0.1308	0.068	0.2109	0.0363	0.531	0.0042	0.0177	0.0003	0.5269	0.0589	0.3814	0.0151	0.2626	0.006	0.0032	0.0101	0.0129	0.0002	0.0002	0.0035	0.008	0.0202	0.0384	0.0232	0.2095	0.0248
0.1283	0.067	0.2081	0.0356	0.5231	0.0041	0.0172	0.0003	0.5201	0.0577	0.376	0.0148	0.2588	0.0058	0.0031	0.0098	0.0126	0.0002	0.0002	0.0034	0.0077	0.0198	0.0376	0.0226	0.2062	0.0242
0.1258	0.0659	0.2053	0.0349	0.5153	0.004	0.0168	0.0003	0.5133	0.0566	0.3706	0.0145	0.255	0.0057	0.003	0.0096	0.0122	0.0002	0.0002	0.0033	0.0075	0.0194	0.0369	0.0221	0.2029	0.0237
0.1234	0.0649	0.2026	0.0342	0.5076	0.0039	0.0163	0.0003	0.5066	0.0555	0.3654	0.0142	0.2513	0.0055	0.0029	0.0093	0.0119	0.0002	0.0002	0.0032	0.0073	0.019	0.0362	0.0215	0.1997	0.0231
0.1211	0.0639	0.1999	0.0335	0.5	0.0038	0.0159	0.0003	0.5	0.0544	0.3602	0.0139	0.2476	0.0054	0.0028	0.009	0.0116	0.0002	0.0002	0.0031	0.0071	0.0186	0.0354	0.021	0.1965	0.0226
0.1187	0.0629	0.1973	0.0328	0.4926	0.0037	0.0155	0.0003	0.4935	0.0533	0.3551	0.0136	0.244	0.0052	0.0027	0.0087	0.0113	0.0002	0.0002	0.003	0.0069	0.0182	0.0347	0.0205	0.1933	0.0221
0.1165	0.0619	0.1947	0.0322	0.4852	0.0036	0.0151	0.0002	0.4871	0.0522	0.3501	0.0133	0.2404	0.0051	0.0026	0.0085	0.0109	0.0002	0.0001	0.0029	0.0067	0.0179	0.034	0.02	0.1902	0.0216
0.1142	0.0609	0.1921	0.0316	0.478	0.0035	0.0147	0.0002	0.4807	0.0512	0.3451	0.0131	0.2369	0.005	0.0025	0.0082	0.0106	0.0002	0.0001	0.0028	0.0065	0.0175	0.0333	0.0195	0.1872	0.0211
0.112	0.0599	0.1896	0.0309	0.4709	0.0035	0.0143	0.0002	0.4745	0.0502	0.3402	0.0128	0.2335	0.0048	0.0024	0.008	0.0104	0.0001	0.0001	0.0028	0.0063	0.0172	0.0327	0.019	0.1842	0.0206
0.1099	0.059	0.187	0.0303	0.4638	0.0034	0.0139	0.0002	0.4683	0.0492	0.3354	0.0125	0.23	0.0047	0.0024	0.0078	0.0101	0.0001	0.0001	0.0027	0.0061	0.0168	0.032	0.0185	0.1813	0.0201
0.1078	0.0581	0.1846	0.0297	0.4569	0.0033	0.0136	0.0002	0.4622	0.0482	0.3306	0.0123	0.2267	0.0046	0.0023	0.0076	0.0098	0.0001	0.0001	0.0026	0.0059	0.0165	0.0314	0.0181	0.1784	0.0196
0.1057	0.0571	0.1821	0.0291	0.4501	0.0032	0.0132	0.0002	0.4562	0.0473	0.3259	0.012	0.2234	0.0045	0.0022	0.0073	0.0095	0.0001	0.0001	0.0025	0.0057	0.0162	0.0308	0.0176	0.1755	0.0192
0.1037	0.0562	0.1797	0.0286	0.4434	0.0031	0.0129	0.0002	0.4503	0.0463	0.3213	0.0118	0.2201	0.0044	0.0021	0.0071	0.0093	0.0001	0.0001	0.0024	0.0056	0.0159	0.0301	0.0172	0.1727	0.0188
0.1017	0.0554	0.1773	0.028	0.4368	0.0031	0.0125	0.0002	0.4444	0.0454	0.3167	0.0116	0.2169	0.0043	0.0021	0.0069	0.009	0.0001	0.0001	0.0024	0.0054	0.0155	0.0295	0.0168	0.17	0.0183
0.0997	0.0545	0.175	0.0274	0.4303	0.003	0.0122	0.0002	0.4386	0.0445	0.3122	0.0113	0.2137	0.0041	0.002	0.0067	0.0088	0.0001	0.0001	0.0023	0.0052	0.0152	0.0289	0.0164	0.1672	0.0179
0.0978	0.0536	0.1727	0.0269	0.4239	0.0029	0.0119	0.0002	0.4329	0.0436	0.3078	0.0111	0.2106	0.004	0.0019	0.0065	0.0085	0.0001	9.93e-05	0.0022	0.0051	0.0149	0.0284	0.016	0.1646	0.0175
0.0959	0.0528	0.1704	0.0264	0.4175	0.0028	0.0116	0.0002	0.4273	0.0428	0.3035	0.0109	0.2075	0.0039	0.0019	0.0063	0.0083	0.0001	9.5e-05	0.0021	0.0049	0.0146	0.0278	0.0156	0.1619	0.0171
0.0941	0.052	0.1681	0.0258	0.4113	0.0028	0.0113	0.0002	0.4217	0.0419	0.2991	0.0106	0.2045	0.0038	0.0018	0.0061	0.0081	0.0001	9.1e-05	0.0021	0.0048	0.0144	0.0272	0.0152	0.1593	0.0167
0.0923	0.0511	0.1659	0.0253	0.4052	0.0027	0.011	0.0002	0.4162	0.0411	0.2949	0.0104	0.2015	0.0037	0.0017	0.006	0.0078	0.0001	8.7e-05	0.002	0.0047	0.0141	0.0267	0.0148	0.1568	0.0163
0.0905	0.0503	0.1637	0.0248	0.3992	0.0026	0.0107	0.0001	0.4108	0.0403	0.2907	0.0102	0.1986	0.0036	0.0017	0.0058	0.0076	9.62e-05	8.33e-05	0.002	0.0045	0.0138	0.0262	0.0144	0.1543	0.0159
0.0888	0.0495	0.1615	0.0243	0.3932	0.0026	0.0104	0.0001	0.4055	0.0395	0.2866	0.01	0.1957	0.0035	0.0016	0.0056	0.0074	9.24e-05	7.97e-05	0.0019	0.0044	0.0135	0.0256	0.0141	0.1518	0.0156
0.0871	0.0488	0.1594	0.0239	0.3873	0.0025	0.0101	0.0001	0.4002	0.0387	0.2825	0.0098	0.1928	0.0034	0.0016	0.0055	0.0072	8.88e-05	7.63e-05	0.0018	0.0043	0.0133	0.0251	0.0137	0.1494	0.0152
0.0854	0.048	0.1573	0.0234	0.3816	0.0024	0.0099	0.0001	0.395	0.0379	0.2785	0.0096	0.19	0.0034	0.0015	0.0053	0.007	8.53e-05	7.3e-05	0.0018	0.0041	0.013	0.0246	0.0134	0.147	0.0149
0.0838	0.0472	0.1552	0.0229	0.3759	0.0024	0.0096	0.0001	0.3898	0.0372	0.2746	0.0094	0.1872	0.0033	0.0015	0.0052	0.0068	8.2e-05	6.99e-05	0.0017	0.004	0.0127	0.0241	0.0131	0.1447	0.0145
0.0822	0.0465	0.1531	0.0225	0.3703	0.0023	0.0093	0.0001	0.3848	0.0364	0.2707	0.0092	0.1845	0.0032	0.0014	0.005	0.0066	7.87e-05	6.69e-05	0.0017	0.0039	0.0125	0.0236	0.0127	0.1424	0.0142
0.0806	0.0458	0.1511	0.022	0.3648	0.0023	0.0091	0.0001	0.3798	0.0357	0.2668	0.009	0.1818	0.0031	0.0014	0.0049	0.0065	7.57e-05	6.4e-05	0.0016	0.0038	0.0122	0.0232	0.0124	0.1401	0.0139
0.079	0.045	0.1491	0.0216	0.3593	0.0022	0.0089	0.0001	0.3748	0.035	0.2631	0.0089	0.1792	0.003	0.0013	0.0047	0.0063	7.27e-05	6.13e-05	0.0016	0.0037	0.012	0.0227	0.0121	0.1378	0.0135
0.0775	0.0443	0.1471	0.0212	0.354	0.0021	0.0086	0.0001	0.3699	0.0343	0.2593	0.0087	0.1765	0.0029	0.0013	0.0046	0.0061	6.98e-05	5.86e-05	0.0015	0.0036	0.0118	0.0222	0.0118	0.1356	0.0132
0.076	0.0436	0.1452	0.0207	0.3487	0.0021	0.0084	0.0001	0.3651	0.0336	0.2556	0.0085	0.174	0.0029	0.0012	0.0044	0.0059	6.71e-05	5.61e-05	0.0015	0.0035	0.0115	0.0218	0.0115	0.1335	0.0129
0.0746	0.0429	0.1433	0.0203	0.3435	0.002	0.0082	0.0001	0.3604	0.033	0.252	0.0083	0.1714	0.0028	0.0012	0.0043	0.0058	6.45e-05	5.37e-05	0.0014	0.0034	0.0113	0.0214	0.0112	0.1313	0.0126
0.0731	0.0423	0.1414	0.0199	0.3384	0.002	0.008	9.7e-05	0.3557	0.0323	0.2484	0.0082	0.1689	0.0027	0.0011	0.0042	0.0056	6.19e-05	5.14e-05	0.0014	0.0033	0.0111	0.0209	0.011	0.1292	0.0123
0.0717	0.0416	0.1395	0.0195	0.3333	0.0019	0.0078	9.32e-05	0.351	0.0317	0.2449	0.008	0.1665	0.0026	0.0011	0.0041	0.0055	5.95e-05	4.92e-05	0.0013	0.0032	0.0108	0.0205	0.0107	0.1272	0.0121
0.0703	0.0409	0.1376	0.0191	0.3284	0.0019	0.0076	8.97e-05	0.3465	0.0311	0.2414	0.0078	0.164	0.0026	0.0011	0.004	0.0053	5.72e-05	4.71e-05	0.0013	0.0031	0.0106	0.0201	0.0104	0.1251	0.0118
0.069	0.0403	0.1358	0.0188	0.3235	0.0019	0.0074	8.62e-05	0.342	0.0304	0.238	0.0077	0.1616	0.0025	0.001	0.0038	0.0052	5.49e-05	4.5e-05	0.0013	0.003	0.0104	0.0197	0.0102	0.1231	0.0115
0.0677	0.0397	0.134	0.0184	0.3186	0.0018	0.0072	8.29e-05	0.3375	0.0298	0.2346	0.0075	0.1593	0.0024	0.001	0.0037	0.005	5.28e-05	4.31e-05	0.0012	0.0029	0.0102	0.0193	0.0099	0.1212	0.0112
0.0664	0.039	0.1322	0.018	0.3139	0.0018	0.007	7.97e-05	0.3331	0.0292	0.2313	0.0074	0.1569	0.0024	0.001	0.0036	0.0049	5.07e-05	4.13e-05	0.0012	0.0028	0.01	0.0189	0.0097	0.1192	0.011
0.0651	0.0384	0.1305	0.0177	0.3092	0.0017	0.0068	7.66e-05	0.3288	0.0287	0.228	0.0072	0.1547	0.0023	0.0009	0.0035	0.0048	4.87e-05	3.95e-05	0.0011	0.0027	0.0098	0.0185	0.0094	0.1173	0.0107
0.0639	0.0378	0.1288	0.0173	0.3046	0.0017	0.0066	7.37e-05	0.3245	0.0281	0.2248	0.0071	0.1524	0.0023	0.0009	0.0034	0.0046	4.68e-05	3.78e-05	0.0011	0.0027	0.0096	0.0182	0.0092	0.1155	0.0105
0.0626	0.0372	0.1271	0.017	0.3001	0.0016	0.0064	7.09e-05	0.3203	0.0275	0.2216	0.0069	0.1502	0.0022	0.0009	0.0033	0.0045	4.5e-05	3.62e-05	0.0011	0.0026	0.0094	0.0178	0.009	0.1136	0.0102
0.0614	0.0366	0.1254	0.0166	0.2956	0.0016	0.0063	6.81e-05	0.3161	0.027	0.2185	0.0068	0.148	0.0021	0.0008	0.0032	0.0044	4.32e-05	3.46e-05	0.001	0.0025	0.0092	0.0174	0.0088	0.1118	0.01
0.0602	0.0361	0.1237	0.0163	0.2912	0.0016	0.0061	6.55e-05	0.312	0.0265	0.2154	0.0067	0.1458	0.0021	0.0008	0.0031	0.0043	4.15e-05	3.31e-05	0.001	0.0024	0.0091	0.0171	0.0085	0.11	0.0098
0.0591	0.0355	0.1221	0.016	0.2868	0.0015	0.006	6.3e-05	0.3079	0.0259	0.2123	0.0065	0.1437	0.002	0.0008	0.003	0.0041	3.99e-05	3.17e-05	0.001	0.0024	0.0089	0.0168	0.0083	0.1083	0.0096
0.058	0.0349	0.1205	0.0157	0.2826	0.0015	0.0058	6.06e-05	0.3039	0.0254	0.2093	0.0064	0.1416	0.002	0.0008	0.0029	0.004	3.83e-05	3.03e-05	0.001	0.0023	0.0087	0.0164	0.0081	0.1065	0.0093
0.0568	0.0344	0.1189	0.0154	0.2784	0.0014	0.0056	5.82e-05	0.3	0.0249	0.2063	0.0063	0.1395	0.0019	0.0007	0.0029	0.0039	3.68e-05	2.9e-05	0.0009	0.0022	0.0085	0.0161	0.0079	0.1048	0.0091
0.0557	0.0338	0.1173	0.0151	0.2742	0.0014	0.0055	5.6e-05	0.2961	0.0244	0.2034	0.0061	0.1375	0.0019	0.0007	0.0028	0.0038	3.54e-05	2.78e-05	0.0009	0.0022	0.0084	0.0158	0.0077	0.1032	0.0089
0.0547	0.0333	0.1157	0.0148	0.2701	0.0014	0.0054	5.38e-05	0.2922	0.0239	0.2005	0.006	0.1355	0.0018	0.0007	0.0027	0.0037	3.4e-05	2.66e-05	0.0009	0.0021	0.0082	0.0155	0.0075	0.1015	0.0087
0.0536	0.0328	0.1142	0.0145	0.2661	0.0013	0.0052	5.18e-05	0.2884	0.0235	0.1977	0.0059	0.1335	0.0018	0.0007	0.0026	0.0036	3.27e-05	2.55e-05	0.0008	0.002	0.008	0.0151	0.0073	0.0999	0.0085
0.0526	0.0323	0.1127	0.0142	0.2621	0.0013	0.0051	4.98e-05	0.2847	0.023	0.1949	0.0058	0.1316	0.0017	0.0006	0.0025	0.0035	3.14e-05	2.44e-05	0.0008	0.002	0.0079	0.0148	0.0072	0.0983	0.0083
0.0516	0.0318	0.1112	0.0139	0.2582	0.0013	0.0049	4.79e-05	0.281	0.0225	0.1921	0.0057	0.1296	0.0017	0.0006	0.0025	0.0034	3.02e-05	2.33e-05	0.0008	0.0019	0.0077	0.0145	0.007	0.0967	0.0081
0.0506	0.0313	0.1097	0.0136	0.2544	0.0012	0.0048	4.6e-05	0.2773	0.0221	0.1894	0.0055	0.1277	0.0016	0.0006	0.0024	0.0033	2.9e-05	2.23e-05	0.0008	0.0019	0.0076	0.0143	0.0068	0.0952	0.0079
0.0496	0.0308	0.1083	0.0134	0.2506	0.0012	0.0047	4.43e-05	0.2737	0.0217	0.1867	0.0054	0.1259	0.0016	0.0006	0.0023	0.0032	2.78e-05	2.14e-05	0.0007	0.0018	0.0074	0.014	0.0066	0.0936	0.0078
0.0487	0.0303	0.1068	0.0131	0.2468	0.0012	0.0046	4.26e-05	0.2701	0.0212	0.1841	0.0053	0.124	0.0016	0.0006	0.0023	0.0031	2.67e-05	2.04e-05	0.0007	0.0017	0.0073	0.0137	0.0065	0.0922	0.0076
0.0477	0.0298	0.1054	0.0128	0.2432	0.0012	0.0044	4.09e-05	0.2666	0.0208	0.1814	0.0052	0.1222	0.0015	0.0005	0.0022	0.003	2.57e-05	1.96e-05	0.0007	0.0017	0.0071	0.0134	0.0063	0.0907	0.0074
0.0468	0.0293	0.104	0.0126	0.2395	0.0011	0.0043	3.93e-05	0.2631	0.0204	0.1789	0.0051	0.1204	0.0015	0.0005	0.0021	0.003	2.47e-05	1.87e-05	0.0007	0.0016	0.007	0.0131	0.0062	0.0892	0.0072
0.0459	0.0289	0.1027	0.0123	0.236	0.0011	0.0042	3.78e-05	0.2597	0.02	0.1763	0.005	0.1187	0.0014	0.0005	0.0021	0.0029	2.37e-05	1.79e-05	0.0007	0.0016	0.0068	0.0129	0.006	0.0878	0.0071
0.045	0.0284	0.1013	0.0121	0.2324	0.0011	0.0041	3.64e-05	0.2563	0.0196	0.1738	0.0049	0.117	0.0014	0.0005	0.002	0.0028	2.28e-05	1.71e-05	0.0006	0.0016	0.0067	0.0126	0.0059	0.0864	0.0069
0.0442	0.028	0.1	0.0118	0.229	0.001	0.004	3.5e-05	0.253	0.0192	0.1714	0.0048	0.1152	0.0014	0.0005	0.002	0.0027	2.19e-05	1.64e-05	0.0006	0.0015	0.0066	0.0124	0.0057	0.085	0.0067
0.0433	0.0275	0.0986	0.0116	0.2256	0.001	0.0039	3.36e-05	0.2497	0.0188	0.1689	0.0047	0.1136	0.0013	0.0005	0.0019	0.0027	2.1e-05	1.57e-05	0.0006	0.0015	0.0064	0.0121	0.0056	0.0837	0.0066
0.0425	0.0271	0.0973	0.0114	0.2222	0.001	0.0038	3.23e-05	0.2465	0.0185	0.1665	0.0046	0.1119	0.0013	0.0004	0.0018	0.0026	2.02e-05	1.5e-05	0.0006	0.0014	0.0063	0.0119	0.0054	0.0823	0.0064
0.0417	0.0267	0.096	0.0112	0.2189	0.001	0.0037	3.11e-05	0.2432	0.0181	0.1642	0.0045	0.1103	0.0013	0.0004	0.0018	0.0025	1.94e-05	1.44e-05	0.0006	0.0014	0.0062	0.0116	0.0053	0.081	0.0063
0.0409	0.0263	0.0948	0.0109	0.2156	0.0009	0.0036	2.99e-05	0.2401	0.0177	0.1618	0.0044	0.1087	0.0012	0.0004	0.0017	0.0024	1.87e-05	1.38e-05	0.0005	0.0013	0.0061	0.0114	0.0052	0.0797	0.0061
0.0401	0.0258	0.0935	0.0107	0.2124	0.0009	0.0035	2.88e-05	0.237	0.0174	0.1596	0.0043	0.1071	0.0012	0.0004	0.0017	0.0024	1.79e-05	1.32e-05	0.0005	0.0013	0.006	0.0112	0.0051	0.0784	0.006
0.0393	0.0254	0.0923	0.0105	0.2093	0.0009	0.0034	2.76e-05	0.2339	0.017	0.1573	0.0042	0.1055	0.0012	0.0004	0.0016	0.0023	1.72e-05	1.26e-05	0.0005	0.0013	0.0058	0.011	0.0049	0.0772	0.0059
0.0386	0.025	0.091	0.0103	0.2061	0.0009	0.0033	2.66e-05	0.2308	0.0167	0.1551	0.0042	0.104	0.0011	0.0004	0.0016	0.0022	1.65e-05	1.21e-05	0.0005	0.0012	0.0057	0.0107	0.0048	0.076	0.0057
0.0378	0.0246	0.0898	0.0101	0.2031	0.0009	0.0032	2.56e-05	0.2278	0.0164	0.1529	0.0041	0.1025	0.0011	0.0004	0.0015	0.0022	1.59e-05	1.15e-05	0.0005	0.0012	0.0056	0.0105	0.0047	0.0747	0.0056
0.0371	0.0243	0.0886	0.0099	0.2	0.0008	0.0031	2.46e-05	0.2249	0.016	0.1507	0.004	0.101	0.0011	0.0003	0.0015	0.0021	1.53e-05	1.1e-05	0.0005	0.0012	0.0055	0.0103	0.0046	0.0735	0.0055
0.0364	0.0239	0.0875	0.0097	0.1971	0.0008	0.0031	2.36e-05	0.2219	0.0157	0.1486	0.0039	0.0995	0.0011	0.0003	0.0015	0.0021	1.47e-05	1.06e-05	0.0004	0.0011	0.0054	0.0101	0.0045	0.0724	0.0053
0.0357	0.0235	0.0863	0.0095	0.1941	0.0008	0.003	2.27e-05	0.219	0.0154	0.1464	0.0038	0.098	0.001	0.0003	0.0014	0.002	1.41e-05	1.01e-05	0.0004	0.0011	0.0053	0.0099	0.0043	0.0712	0.0052
0.035	0.0231	0.0852	0.0093	0.1912	0.0008	0.0029	2.18e-05	0.2162	0.0151	0.1444	0.0038	0.0966	0.001	0.0003	0.0014	0.002	1.35e-05	9.68e-06	0.0004	0.0011	0.0052	0.0097	0.0042	0.0701	0.0051
0.0343	0.0228	0.084	0.0091	0.1884	0.0008	0.0028	2.1e-05	0.2134	0.0148	0.1423	0.0037	0.0952	0.001	0.0003	0.0013	0.0019	1.3e-05	9.27e-06	0.0004	0.001	0.0051	0.0095	0.0041	0.069	0.005
0.0337	0.0224	0.0829	0.009	0.1856	0.0007	0.0028	2.02e-05	0.2106	0.0145	0.1403	0.0036	0.0938	0.0009	0.0003	0.0013	0.0018	1.25e-05	8.87e-06	0.0004	0.001	0.005	0.0093	0.004	0.0679	0.0049
0.033	0.022	0.0818	0.0088	0.1828	0.0007	0.0027	1.94e-05	0.2079	0.0142	0.1383	0.0035	0.0924	0.0009	0.0003	0.0013	0.0018	1.2e-05	8.49e-06	0.0004	0.001	0.0049	0.0091	0.0039	0.0668	0.0048
0.0324	0.0217	0.0807	0.0086	0.1801	0.0007	0.0026	1.87e-05	0.2052	0.014	0.1364	0.0035	0.0911	0.0009	0.0003	0.0012	0.0017	1.15e-05	8.12e-06	0.0004	0.0009	0.0048	0.0089	0.0038	0.0657	0.0046
0.0318	0.0214	0.0797	0.0084	0.1774	0.0007	0.0025	1.8e-05	0.2025	0.0137	0.1344	0.0034	0.0898	0.0009	0.0003	0.0012	0.0017	1.11e-05	7.78e-06	0.0004	0.0009	0.0047	0.0088	0.0037	0.0647	0.0045
0.0312	0.021	0.0786	0.0083	0.1747	0.0007	0.0025	1.73e-05	0.1999	0.0134	0.1325	0.0033	0.0884	0.0009	0.0003	0.0011	0.0017	1.07e-05	7.44e-06	0.0004	0.0009	0.0046	0.0086	0.0036	0.0636	0.0044
0.0306	0.0207	0.0776	0.0081	0.1721	0.0006	0.0024	1.66e-05	0.1972	0.0131	0.1306	0.0033	0.0872	0.0008	0.0002	0.0011	0.0016	1.02e-05	7.12e-06	0.0003	0.0009	0.0045	0.0084	0.0036	0.0626	0.0043
0.03	0.0204	0.0766	0.0079	0.1696	0.0006	0.0024	1.6e-05	0.1947	0.0129	0.1288	0.0032	0.0859	0.0008	0.0002	0.0011	0.0016	9.84e-06	6.82e-06	0.0003	0.0008	0.0044	0.0083	0.0035	0.0616	0.0042
0.0294	0.02	0.0755	0.0078	0.167	0.0006	0.0023	1.54e-05	0.1921	0.0126	0.127	0.0031	0.0846	0.0008	0.0002	0.0011	0.0015	9.45e-06	6.52e-06	0.0003	0.0008	0.0043	0.0081	0.0034	0.0606	0.0041
0.0288	0.0197	0.0745	0.0076	0.1646	0.0006	0.0022	1.48e-05	0.1896	0.0124	0.1252	0.0031	0.0834	0.0008	0.0002	0.001	0.0015	9.08e-06	6.24e-06	0.0003	0.0008	0.0042	0.0079	0.0033	0.0597	0.004
0.0283	0.0194	0.0736	0.0075	0.1621	0.0006	0.0022	1.42e-05	0.1872	0.0121	0.1234	0.003	0.0822	0.0007	0.0002	0.001	0.0014	8.73e-06	5.97e-06	0.0003	0.0008	0.0042	0.0078	0.0032	0.0587	0.0039
0.0277	0.0191	0.0726	0.0073	0.1597	0.0006	0.0021	1.36e-05	0.1847	0.0119	0.1216	0.0029	0.081	0.0007	0.0002	0.001	0.0014	8.38e-06	5.72e-06	0.0003	0.0007	0.0041	0.0076	0.0031	0.0578	0.0039
0.0272	0.0188	0.0716	0.0072	0.1573	0.0006	0.0021	1.31e-05	0.1823	0.0117	0.1199	0.0029	0.0798	0.0007	0.0002	0.0009	0.0014	8.05e-06	5.47e-06	0.0003	0.0007	0.004	0.0075	0.0031	0.0568	0.0038
0.0267	0.0185	0.0707	0.007	0.155	0.0005	0.002	1.26e-05	0.18	0.0114	0.1182	0.0028	0.0786	0.0007	0.0002	0.0009	0.0013	7.74e-06	5.24e-06	0.0003	0.0007	0.0039	0.0073	0.003	0.0559	0.0037
0.0262	0.0182	0.0697	0.0069	0.1526	0.0005	0.002	1.21e-05	0.1776	0.0112	0.1165	0.0028	0.0775	0.0007	0.0002	0.0009	0.0013	7.44e-06	5.01e-06	0.0003	0.0007	0.0038	0.0072	0.0029	0.055	0.0036
0.0257	0.0179	0.0688	0.0068	0.1504	0.0005	0.0019	1.17e-05	0.1753	0.011	0.1149	0.0027	0.0764	0.0007	0.0002	0.0009	0.0013	7.14e-06	4.8e-06	0.0003	0.0007	0.0038	0.007	0.0028	0.0542	0.0035
0.0252	0.0177	0.0679	0.0066	0.1481	0.0005	0.0019	1.12e-05	0.173	0.0108	0.1132	0.0027	0.0752	0.0006	0.0002	0.0008	0.0012	6.86e-06	4.59e-06	0.0002	0.0006	0.0037	0.0069	0.0028	0.0533	0.0034
0.0247	0.0174	0.067	0.0065	0.1459	0.0005	0.0018	1.08e-05	0.1708	0.0105	0.1116	0.0026	0.0741	0.0006	0.0002	0.0008	0.0012	6.59e-06	4.39e-06	0.0002	0.0006	0.0036	0.0067	0.0027	0.0524	0.0034
0.0242	0.0171	0.0661	0.0064	0.1437	0.0005	0.0018	1.04e-05	0.1686	0.0103	0.1101	0.0026	0.0731	0.0006	0.0002	0.0008	0.0012	6.34e-06	4.2e-06	0.0002	0.0006	0.0035	0.0066	0.0026	0.0516	0.0033
0.0238	0.0168	0.0652	0.0062	0.1416	0.0005	0.0017	9.97e-06	0.1664	0.0101	0.1085	0.0025	0.072	0.0006	0.0002	0.0008	0.0011	6.09e-06	4.02e-06	0.0002	0.0006	0.0035	0.0065	0.0026	0.0508	0.0032
0.0233	0.0166	0.0644	0.0061	0.1395	0.0005	0.0017	9.59e-06	0.1642	0.0099	0.107	0.0024	0.0709	0.0006	0.0001	0.0007	0.0011	5.85e-06	3.85e-06	0.0002	0.0006	0.0034	0.0063	0.0025	0.05	0.0031
0.0229	0.0163	0.0635	0.006	0.1374	0.0004	0.0016	9.22e-06	0.1621	0.0097	0.1054	0.0024	0.0699	0.0006	0.0001	0.0007	0.0011	5.62e-06	3.69e-06	0.0002	0.0005	0.0033	0.0062	0.0024	0.0492	0.0031
0.0224	0.0161	0.0627	0.0059	0.1354	0.0004	0.0016	8.87e-06	0.1599	0.0095	0.1039	0.0024	0.0689	0.0005	0.0001	0.0007	0.001	5.4e-06	3.53e-06	0.0002	0.0005	0.0033	0.0061	0.0024	0.0484	0.003
0.022	0.0158	0.0618	0.0058	0.1333	0.0004	0.0015	8.52e-06	0.1579	0.0094	0.1025	0.0023	0.0679	0.0005	0.0001	0.0007	0.001	5.19e-06	3.38e-06	0.0002	0.0005	0.0032	0.006	0.0023	0.0476	0.0029
0.0216	0.0155	0.061	0.0057	0.1314	0.0004	0.0015	8.2e-06	0.1558	0.0092	0.101	0.0023	0.0669	0.0005	0.0001	0.0007	0.001	4.98e-06	3.23e-06	0.0002	0.0005	0.0031	0.0059	0.0023	0.0468	0.0029
0.0211	0.0153	0.0602	0.0055	0.1294	0.0004	0.0015	7.88e-06	0.1538	0.009	0.0996	0.0022	0.0659	0.0005	0.0001	0.0006	0.0009	4.79e-06	3.09e-06	0.0002	0.0005	0.0031	0.0057	0.0022	0.0461	0.0028
0.0207	0.0151	0.0594	0.0054	0.1275	0.0004	0.0014	7.58e-06	0.1518	0.0088	0.0982	0.0022	0.0649	0.0005	0.0001	0.0006	0.0009	4.6e-06	2.96e-06	0.0002	0.0005	0.003	0.0056	0.0022	0.0454	0.0027
0.0203	0.0148	0.0586	0.0053	0.1256	0.0004	0.0014	7.29e-06	0.1498	0.0086	0.0968	0.0021	0.064	0.0005	0.0001	0.0006	0.0009	4.42e-06	2.83e-06	0.0002	0.0005	0.003	0.0055	0.0021	0.0446	0.0027
0.02	0.0146	0.0579	0.0052	0.1237	0.0004	0.0013	7.01e-06	0.1479	0.0085	0.0954	0.0021	0.0631	0.0005	0.0001	0.0006	0.0009	4.25e-06	2.71e-06	0.0002	0.0004	0.0029	0.0054	0.0021	0.0439	0.0026
0.0196	0.0144	0.0571	0.0051	0.1219	0.0004	0.0013	6.74e-06	0.1459	0.0083	0.094	0.002	0.0621	0.0005	0.0001	0.0006	0.0008	4.08e-06	2.59e-06	0.0002	0.0004	0.0028	0.0053	0.002	0.0432	0.0025
0.0192	0.0141	0.0563	0.005	0.12	0.0004	0.0013	6.48e-06	0.144	0.0081	0.0927	0.002	0.0612	0.0004	0.0001	0.0006	0.0008	3.92e-06	2.48e-06	0.0002	0.0004	0.0028	0.0052	0.002	0.0425	0.0025
0.0188	0.0139	0.0556	0.0049	0.1183	0.0003	0.0012	6.23e-06	0.1422	0.008	0.0914	0.002	0.0603	0.0004	0.0001	0.0005	0.0008	3.77e-06	2.38e-06	0.0002	0.0004	0.0027	0.0051	0.0019	0.0419	0.0024
0.0185	0.0137	0.0549	0.0048	0.1165	0.0003	0.0012	5.99e-06	0.1403	0.0078	0.0901	0.0019	0.0595	0.0004	9.91e-05	0.0005	0.0008	3.62e-06	2.27e-06	0.0002	0.0004	0.0027	0.005	0.0019	0.0412	0.0024
0.0181	0.0135	0.0541	0.0047	0.1148	0.0003	0.0012	5.76e-06	0.1385	0.0077	0.0888	0.0019	0.0586	0.0004	9.57e-05	0.0005	0.0008	3.48e-06	2.18e-06	0.0001	0.0004	0.0026	0.0049	0.0018	0.0405	0.0023
0.0178	0.0133	0.0534	0.0046	0.113	0.0003	0.0011	5.54e-06	0.1367	0.0075	0.0876	0.0018	0.0577	0.0004	9.25e-05	0.0005	0.0007	3.34e-06	2.08e-06	0.0001	0.0004	0.0026	0.0048	0.0018	0.0399	0.0023
0.0174	0.0131	0.0527	0.0045	0.1114	0.0003	0.0011	5.32e-06	0.1349	0.0074	0.0863	0.0018	0.0569	0.0004	8.93e-05	0.0005	0.0007	3.21e-06	1.99e-06	0.0001	0.0004	0.0025	0.0047	0.0017	0.0392	0.0022
0.0171	0.0129	0.052	0.0044	0.1097	0.0003	0.0011	5.12e-06	0.1331	0.0072	0.0851	0.0018	0.0561	0.0004	8.63e-05	0.0005	0.0007	3.08e-06	1.91e-06	0.0001	0.0004	0.0025	0.0046	0.0017	0.0386	0.0022
0.0168	0.0127	0.0513	0.0044	0.1081	0.0003	0.0011	4.92e-06	0.1314	0.0071	0.0839	0.0017	0.0552	0.0004	8.34e-05	0.0004	0.0007	2.96e-06	1.83e-06	0.0001	0.0003	0.0024	0.0045	0.0016	0.038	0.0021
0.0164	0.0125	0.0506	0.0043	0.1065	0.0003	0.001	4.73e-06	0.1297	0.0069	0.0827	0.0017	0.0544	0.0004	8.06e-05	0.0004	0.0007	2.85e-06	1.75e-06	0.0001	0.0003	0.0024	0.0044	0.0016	0.0374	0.0021
0.0161	0.0123	0.05	0.0042	0.1049	0.0003	0.001	4.55e-06	0.128	0.0068	0.0815	0.0017	0.0536	0.0003	7.78e-05	0.0004	0.0006	2.74e-06	1.67e-06	0.0001	0.0003	0.0023	0.0043	0.0016	0.0368	0.002
0.0158	0.0121	0.0493	0.0041	0.1033	0.0003	0.001	4.38e-06	0.1263	0.0067	0.0804	0.0016	0.0529	0.0003	7.52e-05	0.0004	0.0006	2.63e-06	1.6e-06	0.0001	0.0003	0.0023	0.0042	0.0015	0.0362	0.002
0.0155	0.0119	0.0487	0.004	0.1018	0.0003	0.001	4.21e-06	0.1247	0.0065	0.0792	0.0016	0.0521	0.0003	7.26e-05	0.0004	0.0006	2.52e-06	1.53e-06	0.0001	0.0003	0.0022	0.0041	0.0015	0.0356	0.0019
0.0152	0.0117	0.048	0.0039	0.1002	0.0003	0.0009	4.05e-06	0.1231	0.0064	0.0781	0.0016	0.0513	0.0003	7.02e-05	0.0004	0.0006	2.43e-06	1.47e-06	0.0001	0.0003	0.0022	0.0041	0.0014	0.0351	0.0019
0.0149	0.0115	0.0474	0.0039	0.0988	0.0003	0.0009	3.89e-06	0.1215	0.0063	0.077	0.0015	0.0506	0.0003	6.78e-05	0.0004	0.0006	2.33e-06	1.4e-06	0.0001	0.0003	0.0021	0.004	0.0014	0.0345	0.0018
0.0146	0.0113	0.0467	0.0038	0.0973	0.0003	0.0009	3.74e-06	0.1199	0.0061	0.0759	0.0015	0.0498	0.0003	6.55e-05	0.0004	0.0006	2.24e-06	1.34e-06	0.0001	0.0003	0.0021	0.0039	0.0014	0.0339	0.0018
0.0144	0.0111	0.0461	0.0037	0.0958	0.0002	0.0009	3.6e-06	0.1183	0.006	0.0748	0.0015	0.0491	0.0003	6.33e-05	0.0004	0.0005	2.15e-06	1.28e-06	0.0001	0.0003	0.0021	0.0038	0.0013	0.0334	0.0017
0.0141	0.011	0.0455	0.0036	0.0944	0.0002	0.0008	3.46e-06	0.1168	0.0059	0.0738	0.0014	0.0484	0.0003	6.11e-05	0.0003	0.0005	2.07e-06	1.23e-06	9.72e-05	0.0003	0.002	0.0037	0.0013	0.0329	0.0017
0.0138	0.0108	0.0449	0.0036	0.093	0.0002	0.0008	3.33e-06	0.1153	0.0058	0.0727	0.0014	0.0477	0.0003	5.91e-05	0.0003	0.0005	1.99e-06	1.18e-06	9.42e-05	0.0003	0.002	0.0037	0.0013	0.0323	0.0017
0.0135	0.0106	0.0443	0.0035	0.0916	0.0002	0.0008	3.2e-06	0.1138	0.0057	0.0717	0.0014	0.047	0.0003	5.71e-05	0.0003	0.0005	1.91e-06	1.13e-06	9.13e-05	0.0002	0.0019	0.0036	0.0012	0.0318	0.0016
0.0133	0.0105	0.0437	0.0034	0.0902	0.0002	0.0008	3.08e-06	0.1123	0.0056	0.0707	0.0014	0.0463	0.0003	5.51e-05	0.0003	0.0005	1.83e-06	1.08e-06	8.85e-05	0.0002	0.0019	0.0035	0.0012	0.0313	0.0016
0.013	0.0103	0.0432	0.0034	0.0889	0.0002	0.0008	2.96e-06	0.1108	0.0055	0.0697	0.0013	0.0456	0.0003	5.33e-05	0.0003	0.0005	1.76e-06	1.03e-06	8.58e-05	0.0002	0.0019	0.0035	0.0012	0.0308	0.0016
0.0128	0.0101	0.0426	0.0033	0.0876	0.0002	0.0007	2.84e-06	0.1094	0.0053	0.0687	0.0013	0.045	0.0003	5.15e-05	0.0003	0.0005	1.69e-06	9.87e-07	8.32e-05	0.0002	0.0018	0.0034	0.0012	0.0303	0.0015
0.0125	0.01	0.042	0.0032	0.0863	0.0002	0.0007	2.73e-06	0.108	0.0052	0.0677	0.0013	0.0443	0.0002	4.97e-05	0.0003	0.0004	1.63e-06	9.44e-07	8.06e-05	0.0002	0.0018	0.0033	0.0011	0.0298	0.0015
0.0123	0.0098	0.0415	0.0032	0.085	0.0002	0.0007	2.63e-06	0.1066	0.0051	0.0667	0.0012	0.0437	0.0002	4.8e-05	0.0003	0.0004	1.56e-06	9.04e-07	7.81e-05	0.0002	0.0018	0.0033	0.0011	0.0294	0.0015
0.0121	0.0097	0.0409	0.0031	0.0837	0.0002	0.0007	2.53e-06	0.1052	0.005	0.0658	0.0012	0.043	0.0002	4.64e-05	0.0003	0.0004	1.5e-06	8.65e-07	7.57e-05	0.0002	0.0017	0.0032	0.0011	0.0289	0.0014
0.0118	0.0095	0.0404	0.003	0.0825	0.0002	0.0007	2.43e-06	0.1038	0.0049	0.0649	0.0012	0.0424	0.0002	4.48e-05	0.0003	0.0004	1.44e-06	8.28e-07	7.34e-05	0.0002	0.0017	0.0031	0.001	0.0284	0.0014
0.0116	0.0094	0.0398	0.003	0.0812	0.0002	0.0006	2.34e-06	0.1025	0.0048	0.0639	0.0012	0.0418	0.0002	4.33e-05	0.0003	0.0004	1.39e-06	7.92e-07	7.11e-05	0.0002	0.0017	0.0031	0.001	0.028	0.0014
0.0114	0.0092	0.0393	0.0029	0.08	0.0002	0.0006	2.25e-06	0.1011	0.0047	0.063	0.0012	0.0412	0.0002	4.18e-05	0.0002	0.0004	1.33e-06	7.58e-07	6.89e-05	0.0002	0.0016	0.003	0.001	0.0275	0.0013
0.0112	0.0091	0.0388	0.0029	0.0788	0.0002	0.0006	2.16e-06	0.0998	0.0046	0.0621	0.0011	0.0406	0.0002	4.04e-05	0.0002	0.0004	1.28e-06	7.26e-07	6.68e-05	0.0002	0.0016	0.0029	0.001	0.0271	0.0013
0.0109	0.0089	0.0383	0.0028	0.0777	0.0002	0.0006	2.08e-06	0.0985	0.0046	0.0613	0.0011	0.04	0.0002	3.91e-05	0.0002	0.0004	1.23e-06	6.94e-07	6.48e-05	0.0002	0.0016	0.0029	0.0009	0.0267	0.0013
0.0107	0.0088	0.0378	0.0028	0.0765	0.0002	0.0006	2e-06	0.0972	0.0045	0.0604	0.0011	0.0394	0.0002	3.77e-05	0.0002	0.0004	1.18e-06	6.65e-07	6.28e-05	0.0002	0.0015	0.0028	0.0009	0.0262	0.0012
0.0105	0.0086	0.0373	0.0027	0.0754	0.0002	0.0006	1.92e-06	0.096	0.0044	0.0595	0.0011	0.0388	0.0002	3.65e-05	0.0002	0.0003	1.13e-06	6.36e-07	6.08e-05	0.0002	0.0015	0.0028	0.0009	0.0258	0.0012
0.0103	0.0085	0.0368	0.0026	0.0742	0.0002	0.0005	1.85e-06	0.0947	0.0043	0.0587	0.001	0.0383	0.0002	3.52e-05	0.0002	0.0003	1.09e-06	6.09e-07	5.9e-05	0.0002	0.0015	0.0027	0.0009	0.0254	0.0012
0.0101	0.0084	0.0363	0.0026	0.0731	0.0002	0.0005	1.78e-06	0.0935	0.0042	0.0579	0.001	0.0377	0.0002	3.4e-05	0.0002	0.0003	1.05e-06	5.83e-07	5.72e-05	0.0002	0.0014	0.0027	0.0009	0.025	0.0012
0.0099	0.0082	0.0358	0.0025	0.072	0.0002	0.0005	1.71e-06	0.0923	0.0041	0.057	0.001	0.0371	0.0002	3.29e-05	0.0002	0.0003	1.01e-06	5.58e-07	5.54e-05	0.0002	0.0014	0.0026	0.0008	0.0246	0.0011
0.0097	0.0081	0.0353	0.0025	0.071	0.0001	0.0005	1.64e-06	0.0911	0.004	0.0562	0.001	0.0366	0.0002	3.18e-05	0.0002	0.0003	9.67e-07	5.34e-07	5.37e-05	0.0001	0.0014	0.0026	0.0008	0.0242	0.0011
0.0096	0.008	0.0349	0.0024	0.0699	0.0001	0.0005	1.58e-06	0.0899	0.004	0.0554	0.001	0.0361	0.0002	3.07e-05	0.0002	0.0003	9.29e-07	5.11e-07	5.2e-05	0.0001	0.0014	0.0025	0.0008	0.0238	0.0011
0.0094	0.0079	0.0344	0.0024	0.0689	0.0001	0.0005	1.52e-06	0.0887	0.0039	0.0546	0.0009	0.0355	0.0002	2.96e-05	0.0002	0.0003	8.92e-07	4.89e-07	5.04e-05	0.0001	0.0013	0.0025	0.0008	0.0234	0.001
0.0092	0.0077	0.0339	0.0023	0.0678	0.0001	0.0005	1.46e-06	0.0875	0.0038	0.0539	0.0009	0.035	0.0002	2.86e-05	0.0002	0.0003	8.57e-07	4.68e-07	4.89e-05	0.0001	0.0013	0.0024	0.0008	0.0231	0.001
0.009	0.0076	0.0335	0.0023	0.0668	0.0001	0.0005	1.4e-06	0.0864	0.0037	0.0531	0.0009	0.0345	0.0002	2.77e-05	0.0002	0.0003	8.24e-07	4.48e-07	4.74e-05	0.0001	0.0013	0.0024	0.0007	0.0227	0.001
0.0088	0.0075	0.0331	0.0023	0.0658	0.0001	0.0004	1.35e-06	0.0853	0.0037	0.0524	0.0009	0.034	0.0002	2.67e-05	0.0002	0.0003	7.92e-07	4.28e-07	4.59e-05	0.0001	0.0013	0.0023	0.0007	0.0223	0.001
0.0087	0.0074	0.0326	0.0022	0.0648	0.0001	0.0004	1.3e-06	0.0842	0.0036	0.0516	0.0009	0.0335	0.0002	2.58e-05	0.0002	0.0003	7.6e-07	4.1e-07	4.45e-05	0.0001	0.0012	0.0023	0.0007	0.022	0.001
0.0085	0.0073	0.0322	0.0022	0.0639	0.0001	0.0004	1.25e-06	0.0831	0.0035	0.0509	0.0008	0.033	0.0001	2.49e-05	0.0002	0.0003	7.31e-07	3.92e-07	4.31e-05	0.0001	0.0012	0.0022	0.0007	0.0216	0.0009
0.0083	0.0071	0.0318	0.0021	0.0629	0.0001	0.0004	1.2e-06	0.082	0.0034	0.0502	0.0008	0.0325	0.0001	2.41e-05	0.0002	0.0003	7.02e-07	3.76e-07	4.18e-05	0.0001	0.0012	0.0022	0.0007	0.0213	0.0009
0.0082	0.007	0.0313	0.0021	0.062	0.0001	0.0004	1.15e-06	0.0809	0.0034	0.0494	0.0008	0.0321	0.0001	2.33e-05	0.0002	0.0002	6.74e-07	3.59e-07	4.05e-05	0.0001	0.0012	0.0021	0.0007	0.0209	0.0009
0.008	0.0069	0.0309	0.002	0.0611	0.0001	0.0004	1.11e-06	0.0799	0.0033	0.0487	0.0008	0.0316	0.0001	2.25e-05	0.0001	0.0002	6.48e-07	3.44e-07	3.93e-05	0.0001	0.0011	0.0021	0.0006	0.0206	0.0009
0.0079	0.0068	0.0305	0.002	0.0602	0.0001	0.0004	1.07e-06	0.0788	0.0032	0.0481	0.0008	0.0311	0.0001	2.17e-05	0.0001	0.0002	6.23e-07	3.29e-07	3.81e-05	0.0001	0.0011	0.002	0.0006	0.0203	0.0009
0.0077	0.0067	0.0301	0.002	0.0593	0.0001	0.0004	1.03e-06	0.0778	0.0032	0.0474	0.0008	0.0307	0.0001	2.1e-05	0.0001	0.0002	5.98e-07	3.15e-07	3.69e-05	0.0001	0.0011	0.002	0.0006	0.02	0.0008
0.0076	0.0066	0.0297	0.0019	0.0584	0.0001	0.0004	9.86e-07	0.0768	0.0031	0.0467	0.0007	0.0302	0.0001	2.03e-05	0.0001	0.0002	5.75e-07	3.01e-07	3.58e-05	0.0001	0.0011	0.002	0.0006	0.0196	0.0008
0.0074	0.0065	0.0293	0.0019	0.0575	0.0001	0.0003	9.48e-07	0.0758	0.0031	0.046	0.0007	0.0298	0.0001	1.96e-05	0.0001	0.0002	5.52e-07	2.89e-07	3.47e-05	9.8e-05	0.001	0.0019	0.0006	0.0193	0.0008
0.0073	0.0064	0.0289	0.0018	0.0567	0.0001	0.0003	9.12e-07	0.0748	0.003	0.0454	0.0007	0.0294	0.0001	1.89e-05	0.0001	0.0002	5.31e-07	2.76e-07	3.36e-05	9.52e-05	0.001	0.0019	0.0006	0.019	0.0008
0.0071	0.0063	0.0285	0.0018	0.0558	9.93e-05	0.0003	8.77e-07	0.0738	0.0029	0.0447	0.0007	0.0289	0.0001	1.83e-05	0.0001	0.0002	5.1e-07	2.64e-07	3.26e-05	9.24e-05	0.001	0.0018	0.0005	0.0187	0.0008
0.007	0.0062	0.0282	0.0018	0.055	9.68e-05	0.0003	8.43e-07	0.0729	0.0029	0.0441	0.0007	0.0285	0.0001	1.77e-05	0.0001	0.0002	4.9e-07	2.53e-07	3.16e-05	8.97e-05	0.001	0.0018	0.0005	0.0184	0.0007
0.0069	0.0061	0.0278	0.0017	0.0542	9.44e-05	0.0003	8.11e-07	0.0719	0.0028	0.0435	0.0007	0.0281	0.0001	1.71e-05	0.0001	0.0002	4.71e-07	2.42e-07	3.06e-05	8.7e-05	0.001	0.0018	0.0005	0.0181	0.0007
0.0067	0.006	0.0274	0.0017	0.0533	9.21e-05	0.0003	7.79e-07	0.071	0.0028	0.0429	0.0007	0.0277	0.0001	1.65e-05	0.0001	0.0002	4.52e-07	2.32e-07	2.97e-05	8.45e-05	0.0009	0.0017	0.0005	0.0178	0.0007
0.0066	0.0059	0.0271	0.0017	0.0526	8.98e-05	0.0003	7.49e-07	0.0701	0.0027	0.0423	0.0007	0.0273	0.0001	1.59e-05	0.0001	0.0002	4.34e-07	2.22e-07	2.87e-05	8.2e-05	0.0009	0.0017	0.0005	0.0175	0.0007
0.0065	0.0058	0.0267	0.0016	0.0518	8.76e-05	0.0003	7.21e-07	0.0692	0.0027	0.0417	0.0006	0.0269	0.0001	1.54e-05	0.0001	0.0002	4.17e-07	2.12e-07	2.79e-05	7.96e-05	0.0009	0.0017	0.0005	0.0173	0.0007
0.0064	0.0057	0.0263	0.0016	0.051	8.55e-05	0.0003	6.93e-07	0.0683	0.0026	0.0411	0.0006	0.0265	9.87e-05	1.49e-05	0.0001	0.0002	4.01e-07	2.03e-07	2.7e-05	7.73e-05	0.0009	0.0016	0.0005	0.017	0.0007
0.0062	0.0056	0.026	0.0016	0.0502	8.33e-05	0.0003	6.66e-07	0.0674	0.0025	0.0405	0.0006	0.0261	9.61e-05	1.44e-05	0.0001	0.0002	3.85e-07	1.94e-07	2.62e-05	7.5e-05	0.0009	0.0016	0.0005	0.0167	0.0006
0.0061	0.0055	0.0257	0.0015	0.0495	8.13e-05	0.0003	6.41e-07	0.0665	0.0025	0.0399	0.0006	0.0257	9.36e-05	1.39e-05	9.72e-05	0.0002	3.7e-07	1.86e-07	2.54e-05	7.28e-05	0.0009	0.0016	0.0004	0.0164	0.0006
0.006	0.0055	0.0253	0.0015	0.0488	7.93e-05	0.0003	6.16e-07	0.0656	0.0024	0.0393	0.0006	0.0253	9.12e-05	1.34e-05	9.44e-05	0.0002	3.56e-07	1.78e-07	2.46e-05	7.07e-05	0.0008	0.0015	0.0004	0.0162	0.0006
0.0059	0.0054	0.025	0.0015	0.048	7.73e-05	0.0003	5.92e-07	0.0648	0.0024	0.0388	0.0006	0.025	8.88e-05	1.3e-05	9.16e-05	0.0002	3.42e-07	1.7e-07	2.38e-05	6.86e-05	0.0008	0.0015	0.0004	0.0159	0.0006
0.0058	0.0053	0.0246	0.0015	0.0473	7.54e-05	0.0002	5.7e-07	0.0639	0.0024	0.0382	0.0006	0.0246	8.65e-05	1.25e-05	8.9e-05	0.0001	3.28e-07	1.63e-07	2.31e-05	6.66e-05	0.0008	0.0015	0.0004	0.0157	0.0006
0.0057	0.0052	0.0243	0.0014	0.0466	7.36e-05	0.0002	5.48e-07	0.0631	0.0023	0.0377	0.0006	0.0242	8.43e-05	1.21e-05	8.64e-05	0.0001	3.15e-07	1.56e-07	2.24e-05	6.47e-05	0.0008	0.0014	0.0004	0.0154	0.0006
0.0056	0.0051	0.024	0.0014	0.0459	7.17e-05	0.0002	5.27e-07	0.0623	0.0023	0.0372	0.0005	0.0239	8.21e-05	1.17e-05	8.39e-05	0.0001	3.03e-07	1.49e-07	2.17e-05	6.28e-05	0.0008	0.0014	0.0004	0.0152	0.0006
0.0054	0.005	0.0237	0.0014	0.0452	7e-05	0.0002	5.06e-07	0.0615	0.0022	0.0366	0.0005	0.0235	7.99e-05	1.13e-05	8.15e-05	0.0001	2.91e-07	1.43e-07	2.1e-05	6.09e-05	0.0008	0.0014	0.0004	0.0149	0.0005
0.0053	0.005	0.0234	0.0013	0.0445	6.82e-05	0.0002	4.87e-07	0.0607	0.0022	0.0361	0.0005	0.0232	7.79e-05	1.09e-05	7.91e-05	0.0001	2.8e-07	1.37e-07	2.04e-05	5.92e-05	0.0007	0.0014	0.0004	0.0147	0.0005
0.0052	0.0049	0.0231	0.0013	0.0439	6.66e-05	0.0002	4.68e-07	0.0599	0.0021	0.0356	0.0005	0.0229	7.59e-05	1.05e-05	7.68e-05	0.0001	2.69e-07	1.31e-07	1.98e-05	5.74e-05	0.0007	0.0013	0.0004	0.0145	0.0005
0.0051	0.0048	0.0228	0.0013	0.0432	6.49e-05	0.0002	4.5e-07	0.0591	0.0021	0.0351	0.0005	0.0225	7.39e-05	1.02e-05	7.46e-05	0.0001	2.58e-07	1.25e-07	1.91e-05	5.58e-05	0.0007	0.0013	0.0004	0.0142	0.0005
0.005	0.0047	0.0225	0.0013	0.0426	6.33e-05	0.0002	4.33e-07	0.0583	0.002	0.0346	0.0005	0.0222	7.2e-05	9.83e-06	7.24e-05	0.0001	2.48e-07	1.2e-07	1.86e-05	5.41e-05	0.0007	0.0013	0.0003	0.014	0.0005
0.0049	0.0047	0.0222	0.0012	0.042	6.17e-05	0.0002	4.16e-07	0.0576	0.002	0.0341	0.0005	0.0219	7.01e-05	9.5e-06	7.03e-05	0.0001	2.38e-07	1.15e-07	1.8e-05	5.25e-05	0.0007	0.0013	0.0003	0.0138	0.0005
0.0048	0.0046	0.0219	0.0012	0.0413	6.02e-05	0.0002	4e-07	0.0568	0.002	0.0336	0.0005	0.0216	6.83e-05	9.18e-06	6.83e-05	0.0001	2.29e-07	1.1e-07	1.74e-05	5.1e-05	0.0007	0.0012	0.0003	0.0136	0.0005
0.0048	0.0045	0.0216	0.0012	0.0407	5.87e-05	0.0002	3.85e-07	0.0561	0.0019	0.0331	0.0005	0.0212	6.65e-05	8.87e-06	6.63e-05	0.0001	2.2e-07	1.05e-07	1.69e-05	4.95e-05	0.0007	0.0012	0.0003	0.0133	0.0005
0.0047	0.0044	0.0213	0.0012	0.0401	5.73e-05	0.0002	3.7e-07	0.0553	0.0019	0.0327	0.0005	0.0209	6.48e-05	8.56e-06	6.44e-05	0.0001	2.11e-07	1.01e-07	1.64e-05	4.81e-05	0.0006	0.0012	0.0003	0.0131	0.0005
0.0046	0.0044	0.021	0.0011	0.0395	5.59e-05	0.0002	3.56e-07	0.0546	0.0019	0.0322	0.0004	0.0206	6.31e-05	8.27e-06	6.25e-05	0.0001	2.03e-07	9.62e-08	1.59e-05	4.67e-05	0.0006	0.0012	0.0003	0.0129	0.0004
0.0045	0.0043	0.0207	0.0011	0.0389	5.45e-05	0.0002	3.42e-07	0.0539	0.0018	0.0318	0.0004	0.0203	6.15e-05	7.99e-06	6.07e-05	0.0001	1.95e-07	9.21e-08	1.54e-05	4.53e-05	0.0006	0.0011	0.0003	0.0127	0.0004
0.0044	0.0042	0.0205	0.0011	0.0383	5.31e-05	0.0002	3.29e-07	0.0532	0.0018	0.0313	0.0004	0.02	5.99e-05	7.72e-06	5.9e-05	0.0001	1.88e-07	8.81e-08	1.49e-05	4.4e-05	0.0006	0.0011	0.0003	0.0125	0.0004
0.0043	0.0042	0.0202	0.0011	0.0378	5.18e-05	0.0002	3.16e-07	0.0525	0.0017	0.0309	0.0004	0.0197	5.83e-05	7.46e-06	5.72e-05	9.74e-05	1.8e-07	8.44e-08	1.45e-05	4.27e-05	0.0006	0.0011	0.0003	0.0123	0.0004
0.0042	0.0041	0.0199	0.0011	0.0372	5.06e-05	0.0002	3.04e-07	0.0518	0.0017	0.0304	0.0004	0.0194	5.68e-05	7.21e-06	5.56e-05	9.47e-05	1.73e-07	8.07e-08	1.4e-05	4.14e-05	0.0006	0.0011	0.0003	0.0121	0.0004
0.0041	0.004	0.0196	0.001	0.0366	4.93e-05	0.0002	2.92e-07	0.0512	0.0017	0.03	0.0004	0.0192	5.53e-05	6.96e-06	5.4e-05	9.21e-05	1.66e-07	7.73e-08	1.36e-05	4.02e-05	0.0006	0.001	0.0003	0.0119	0.0004
0.0041	0.004	0.0194	0.001	0.0361	4.81e-05	0.0002	2.81e-07	0.0505	0.0016	0.0296	0.0004	0.0189	5.39e-05	6.73e-06	5.24e-05	8.96e-05	1.6e-07	7.39e-08	1.32e-05	3.9e-05	0.0006	0.001	0.0003	0.0117	0.0004
0.004	0.0039	0.0191	0.001	0.0356	4.69e-05	0.0001	2.7e-07	0.0498	0.0016	0.0291	0.0004	0.0186	5.25e-05	6.5e-06	5.09e-05	8.71e-05	1.54e-07	7.08e-08	1.28e-05	3.79e-05	0.0006	0.001	0.0003	0.0115	0.0004
0.0039	0.0038	0.0189	0.001	0.035	4.57e-05	0.0001	2.6e-07	0.0492	0.0016	0.0287	0.0004	0.0183	5.11e-05	6.28e-06	4.94e-05	8.47e-05	1.48e-07	6.77e-08	1.24e-05	3.68e-05	0.0005	0.001	0.0003	0.0114	0.0004
0.0038	0.0038	0.0186	0.001	0.0345	4.46e-05	0.0001	2.5e-07	0.0486	0.0015	0.0283	0.0004	0.0181	4.98e-05	6.07e-06	4.8e-05	8.24e-05	1.42e-07	6.48e-08	1.2e-05	3.57e-05	0.0005	0.001	0.0002	0.0112	0.0004
0.0038	0.0037	0.0184	0.0009	0.034	4.35e-05	0.0001	2.4e-07	0.0479	0.0015	0.0279	0.0004	0.0178	4.85e-05	5.86e-06	4.66e-05	8.02e-05	1.36e-07	6.2e-08	1.16e-05	3.47e-05	0.0005	0.0009	0.0002	0.011	0.0004
0.0037	0.0037	0.0181	0.0009	0.0335	4.24e-05	0.0001	2.31e-07	0.0473	0.0015	0.0275	0.0004	0.0175	4.72e-05	5.66e-06	4.52e-05	7.8e-05	1.31e-07	5.94e-08	1.13e-05	3.36e-05	0.0005	0.0009	0.0002	0.0108	0.0003
0.0036	0.0036	0.0179	0.0009	0.033	4.14e-05	0.0001	2.22e-07	0.0467	0.0015	0.0271	0.0003	0.0173	4.6e-05	5.47e-06	4.39e-05	7.58e-05	1.26e-07	5.68e-08	1.09e-05	3.27e-05	0.0005	0.0009	0.0002	0.0106	0.0003
0.0036	0.0036	0.0177	0.0009	0.0325	4.04e-05	0.0001	2.14e-07	0.0461	0.0014	0.0268	0.0003	0.017	4.48e-05	5.29e-06	4.27e-05	7.37e-05	1.21e-07	5.44e-08	1.06e-05	3.17e-05	0.0005	0.0009	0.0002	0.0105	0.0003
0.0035	0.0035	0.0174	0.0009	0.032	3.94e-05	0.0001	2.05e-07	0.0455	0.0014	0.0264	0.0003	0.0168	4.36e-05	5.11e-06	4.14e-05	7.17e-05	1.16e-07	5.2e-08	1.02e-05	3.08e-05	0.0005	0.0009	0.0002	0.0103	0.0003
0.0034	0.0034	0.0172	0.0008	0.0315	3.84e-05	0.0001	1.98e-07	0.0449	0.0014	0.026	0.0003	0.0165	4.25e-05	4.93e-06	4.02e-05	6.98e-05	1.11e-07	4.98e-08	9.93e-06	2.99e-05	0.0005	0.0009	0.0002	0.0101	0.0003
0.0034	0.0034	0.017	0.0008	0.0311	3.75e-05	0.0001	1.9e-07	0.0443	0.0013	0.0256	0.0003	0.0163	4.14e-05	4.77e-06	3.91e-05	6.79e-05	1.07e-07	4.77e-08	9.63e-06	2.9e-05	0.0005	0.0008	0.0002	0.01	0.0003
0.0033	0.0033	0.0167	0.0008	0.0306	3.65e-05	0.0001	1.83e-07	0.0437	0.0013	0.0253	0.0003	0.0161	4.03e-05	4.6e-06	3.79e-05	6.6e-05	1.03e-07	4.56e-08	9.33e-06	2.82e-05	0.0005	0.0008	0.0002	0.0098	0.0003
0.0032	0.0033	0.0165	0.0008	0.0301	3.56e-05	0.0001	1.76e-07	0.0432	0.0013	0.0249	0.0003	0.0158	3.93e-05	4.45e-06	3.68e-05	6.42e-05	9.89e-08	4.37e-08	9.04e-06	2.73e-05	0.0004	0.0008	0.0002	0.0097	0.0003
0.0032	0.0032	0.0163	0.0008	0.0297	3.47e-05	0.0001	1.69e-07	0.0426	0.0013	0.0246	0.0003	0.0156	3.83e-05	4.3e-06	3.58e-05	6.24e-05	9.5e-08	4.18e-08	8.76e-06	2.65e-05	0.0004	0.0008	0.0002	0.0095	0.0003
0.0031	0.0032	0.0161	0.0008	0.0293	3.39e-05	0.0001	1.62e-07	0.042	0.0012	0.0242	0.0003	0.0154	3.73e-05	4.15e-06	3.47e-05	6.07e-05	9.13e-08	4e-08	8.49e-06	2.58e-05	0.0004	0.0008	0.0002	0.0094	0.0003
0.003	0.0031	0.0159	0.0007	0.0288	3.31e-05	0.0001	1.56e-07	0.0415	0.0012	0.0239	0.0003	0.0151	3.63e-05	4.01e-06	3.37e-05	5.91e-05	8.77e-08	3.83e-08	8.23e-06	2.5e-05	0.0004	0.0008	0.0002	0.0092	0.0003
0.003	0.0031	0.0157	0.0007	0.0284	3.22e-05	9.98e-05	1.5e-07	0.0409	0.0012	0.0235	0.0003	0.0149	3.54e-05	3.88e-06	3.27e-05	5.74e-05	8.43e-08	3.66e-08	7.98e-06	2.43e-05	0.0004	0.0007	0.0002	0.0091	0.0003
0.0029	0.003	0.0155	0.0007	0.028	3.14e-05	9.72e-05	1.44e-07	0.0404	0.0012	0.0232	0.0003	0.0147	3.44e-05	3.74e-06	3.18e-05	5.59e-05	8.1e-08	3.5e-08	7.73e-06	2.36e-05	0.0004	0.0007	0.0002	0.0089	0.0003
0.0029	0.003	0.0153	0.0007	0.0275	3.07e-05	9.46e-05	1.39e-07	0.0399	0.0011	0.0229	0.0003	0.0145	3.35e-05	3.62e-06	3.09e-05	5.43e-05	7.78e-08	3.35e-08	7.5e-06	2.29e-05	0.0004	0.0007	0.0002	0.0088	0.0003
0.0028	0.0029	0.015	0.0007	0.0271	2.99e-05	9.22e-05	1.33e-07	0.0394	0.0011	0.0225	0.0003	0.0143	3.27e-05	3.49e-06	3e-05	5.28e-05	7.47e-08	3.21e-08	7.27e-06	2.22e-05	0.0004	0.0007	0.0002	0.0086	0.0002
0.0028	0.0029	0.0149	0.0007	0.0267	2.92e-05	8.97e-05	1.28e-07	0.0389	0.0011	0.0222	0.0003	0.0141	3.18e-05	3.38e-06	2.91e-05	5.14e-05	7.18e-08	3.07e-08	7.04e-06	2.16e-05	0.0004	0.0007	0.0002	0.0085	0.0002
0.0027	0.0028	0.0147	0.0007	0.0263	2.84e-05	8.74e-05	1.23e-07	0.0384	0.0011	0.0219	0.0003	0.0139	3.1e-05	3.26e-06	2.83e-05	5e-05	6.9e-08	2.94e-08	6.83e-06	2.09e-05	0.0004	0.0007	0.0002	0.0084	0.0002
0.0027	0.0028	0.0145	0.0007	0.0259	2.77e-05	8.51e-05	1.19e-07	0.0379	0.0011	0.0216	0.0002	0.0137	3.02e-05	3.15e-06	2.74e-05	4.86e-05	6.63e-08	2.81e-08	6.62e-06	2.03e-05	0.0004	0.0007	0.0002	0.0082	0.0002
0.0026	0.0028	0.0143	0.0006	0.0256	2.71e-05	8.29e-05	1.14e-07	0.0374	0.001	0.0213	0.0002	0.0135	2.94e-05	3.04e-06	2.66e-05	4.73e-05	6.37e-08	2.69e-08	6.41e-06	1.97e-05	0.0004	0.0006	0.0001	0.0081	0.0002
0.0026	0.0027	0.0141	0.0006	0.0252	2.64e-05	8.07e-05	1.1e-07	0.0369	0.001	0.021	0.0002	0.0133	2.86e-05	2.94e-06	2.59e-05	4.6e-05	6.12e-08	2.58e-08	6.22e-06	1.91e-05	0.0003	0.0006	0.0001	0.008	0.0002
0.0025	0.0027	0.0139	0.0006	0.0248	2.57e-05	7.86e-05	1.05e-07	0.0364	0.001	0.0207	0.0002	0.0131	2.79e-05	2.84e-06	2.51e-05	4.47e-05	5.88e-08	2.47e-08	6.02e-06	1.86e-05	0.0003	0.0006	0.0001	0.0078	0.0002
0.0025	0.0026	0.0137	0.0006	0.0244	2.51e-05	7.65e-05	1.01e-07	0.0359	0.001	0.0204	0.0002	0.0129	2.72e-05	2.74e-06	2.44e-05	4.35e-05	5.65e-08	2.36e-08	5.84e-06	1.8e-05	0.0003	0.0006	0.0001	0.0077	0.0002
0.0024	0.0026	0.0135	0.0006	0.0241	2.45e-05	7.45e-05	9.75e-08	0.0355	0.001	0.0201	0.0002	0.0127	2.65e-05	2.65e-06	2.37e-05	4.23e-05	5.43e-08	2.26e-08	5.66e-06	1.75e-05	0.0003	0.0006	0.0001	0.0076	0.0002
0.0024	0.0025	0.0133	0.0006	0.0237	2.39e-05	7.26e-05	9.38e-08	0.035	0.0009	0.0198	0.0002	0.0125	2.58e-05	2.56e-06	2.3e-05	4.12e-05	5.21e-08	2.16e-08	5.48e-06	1.7e-05	0.0003	0.0006	0.0001	0.0075	0.0002
0.0023	0.0025	0.0132	0.0006	0.0234	2.33e-05	7.07e-05	9.02e-08	0.0345	0.0009	0.0195	0.0002	0.0123	2.51e-05	2.48e-06	2.23e-05	4e-05	5.01e-08	2.07e-08	5.32e-06	1.65e-05	0.0003	0.0006	0.0001	0.0073	0.0002
0.0023	0.0025	0.013	0.0006	0.023	2.27e-05	6.88e-05	8.67e-08	0.0341	0.0009	0.0193	0.0002	0.0121	2.45e-05	2.39e-06	2.17e-05	3.89e-05	4.81e-08	1.98e-08	5.15e-06	1.6e-05	0.0003	0.0006	0.0001	0.0072	0.0002
0.0022	0.0024	0.0128	0.0005	0.0227	2.22e-05	6.7e-05	8.34e-08	0.0336	0.0009	0.019	0.0002	0.012	2.38e-05	2.31e-06	2.11e-05	3.79e-05	4.62e-08	1.9e-08	4.99e-06	1.55e-05	0.0003	0.0005	0.0001	0.0071	0.0002
0.0022	0.0024	0.0127	0.0005	0.0223	2.16e-05	6.53e-05	8.02e-08	0.0332	0.0009	0.0187	0.0002	0.0118	2.32e-05	2.23e-06	2.05e-05	3.68e-05	4.44e-08	1.81e-08	4.84e-06	1.51e-05	0.0003	0.0005	0.0001	0.007	0.0002
0.0021	0.0024	0.0125	0.0005	0.022	2.11e-05	6.36e-05	7.71e-08	0.0328	0.0008	0.0185	0.0002	0.0116	2.26e-05	2.16e-06	1.99e-05	3.58e-05	4.27e-08	1.74e-08	4.69e-06	1.46e-05	0.0003	0.0005	0.0001	0.0069	0.0002
0.0021	0.0023	0.0123	0.0005	0.0217	2.06e-05	6.19e-05	7.41e-08	0.0323	0.0008	0.0182	0.0002	0.0115	2.2e-05	2.08e-06	1.93e-05	3.48e-05	4.1e-08	1.66e-08	4.55e-06	1.42e-05	0.0003	0.0005	0.0001	0.0068	0.0002
0.0021	0.0023	0.0122	0.0005	0.0213	2e-05	6.03e-05	7.13e-08	0.0319	0.0008	0.0179	0.0002	0.0113	2.14e-05	2.01e-06	1.87e-05	3.39e-05	3.94e-08	1.59e-08	4.41e-06	1.38e-05	0.0003	0.0005	0.0001	0.0067	0.0002
0.002	0.0022	0.012	0.0005	0.021	1.96e-05	5.87e-05	6.85e-08	0.0315	0.0008	0.0177	0.0002	0.0111	2.09e-05	1.94e-06	1.82e-05	3.3e-05	3.79e-08	1.52e-08	4.27e-06	1.34e-05	0.0003	0.0005	0.0001	0.0066	0.0002
0.002	0.0022	0.0118	0.0005	0.0207	1.91e-05	5.71e-05	6.59e-08	0.0311	0.0008	0.0174	0.0002	0.011	2.03e-05	1.88e-06	1.77e-05	3.21e-05	3.64e-08	1.46e-08	4.14e-06	1.3e-05	0.0003	0.0005	0.0001	0.0065	0.0002
0.0019	0.0022	0.0117	0.0005	0.0204	1.86e-05	5.57e-05	6.34e-08	0.0307	0.0008	0.0172	0.0002	0.0108	1.98e-05	1.81e-06	1.71e-05	3.12e-05	3.5e-08	1.39e-08	4.01e-06	1.26e-05	0.0003	0.0005	0.0001	0.0064	0.0002
0.0019	0.0021	0.0115	0.0005	0.0201	1.81e-05	5.42e-05	6.09e-08	0.0303	0.0008	0.0169	0.0002	0.0106	1.93e-05	1.75e-06	1.66e-05	3.03e-05	3.36e-08	1.33e-08	3.89e-06	1.23e-05	0.0003	0.0005	9.97e-05	0.0063	0.0002
0.0019	0.0021	0.0114	0.0005	0.0198	1.77e-05	5.28e-05	5.86e-08	0.0299	0.0007	0.0167	0.0002	0.0105	1.88e-05	1.69e-06	1.62e-05	2.95e-05	3.23e-08	1.28e-08	3.77e-06	1.19e-05	0.0003	0.0005	9.72e-05	0.0062	0.0002
0.0018	0.0021	0.0112	0.0004	0.0195	1.73e-05	5.14e-05	5.63e-08	0.0295	0.0007	0.0165	0.0002	0.0103	1.83e-05	1.64e-06	1.57e-05	2.87e-05	3.1e-08	1.22e-08	3.65e-06	1.16e-05	0.0002	0.0004	9.48e-05	0.0061	0.0001
0.0018	0.002	0.0111	0.0004	0.0192	1.68e-05	5e-05	5.42e-08	0.0291	0.0007	0.0162	0.0002	0.0102	1.78e-05	1.58e-06	1.52e-05	2.79e-05	2.98e-08	1.17e-08	3.54e-06	1.12e-05	0.0002	0.0004	9.25e-05	0.006	0.0001
0.0018	0.002	0.0109	0.0004	0.0189	1.64e-05	4.87e-05	5.21e-08	0.0287	0.0007	0.016	0.0002	0.01	1.74e-05	1.53e-06	1.48e-05	2.71e-05	2.86e-08	1.12e-08	3.43e-06	1.09e-05	0.0002	0.0004	9.02e-05	0.0059	0.0001
0.0017	0.002	0.0108	0.0004	0.0186	1.6e-05	4.75e-05	5.01e-08	0.0284	0.0007	0.0158	0.0002	0.0099	1.69e-05	1.48e-06	1.44e-05	2.64e-05	2.75e-08	1.07e-08	3.33e-06	1.06e-05	0.0002	0.0004	8.8e-05	0.0058	0.0001
0.0017	0.0019	0.0106	0.0004	0.0184	1.56e-05	4.62e-05	4.81e-08	0.028	0.0007	0.0155	0.0002	0.0097	1.65e-05	1.43e-06	1.4e-05	2.57e-05	2.64e-08	1.02e-08	3.22e-06	1.03e-05	0.0002	0.0004	8.58e-05	0.0057	0.0001
0.0017	0.0019	0.0105	0.0004	0.0181	1.52e-05	4.5e-05	4.63e-08	0.0276	0.0007	0.0153	0.0002	0.0096	1.61e-05	1.38e-06	1.35e-05	2.5e-05	2.54e-08	9.81e-09	3.13e-06	9.96e-06	0.0002	0.0004	8.37e-05	0.0056	0.0001
0.0016	0.0019	0.0104	0.0004	0.0178	1.49e-05	4.38e-05	4.45e-08	0.0273	0.0006	0.0151	0.0001	0.0095	1.56e-05	1.33e-06	1.32e-05	2.43e-05	2.44e-08	9.38e-09	3.03e-06	9.66e-06	0.0002	0.0004	8.16e-05	0.0055	0.0001
0.0016	0.0019	0.0102	0.0004	0.0176	1.45e-05	4.27e-05	4.28e-08	0.0269	0.0006	0.0149	0.0001	0.0093	1.52e-05	1.29e-06	1.28e-05	2.36e-05	2.34e-08	8.98e-09	2.94e-06	9.38e-06	0.0002	0.0004	7.96e-05	0.0054	0.0001
0.0016	0.0018	0.0101	0.0004	0.0173	1.41e-05	4.16e-05	4.12e-08	0.0266	0.0006	0.0147	0.0001	0.0092	1.48e-05	1.24e-06	1.24e-05	2.3e-05	2.25e-08	8.6e-09	2.85e-06	9.11e-06	0.0002	0.0004	7.77e-05	0.0053	0.0001
0.0015	0.0018	0.01	0.0004	0.017	1.38e-05	4.05e-05	3.96e-08	0.0262	0.0006	0.0145	0.0001	0.0091	1.45e-05	1.2e-06	1.2e-05	2.23e-05	2.16e-08	8.23e-09	2.76e-06	8.84e-06	0.0002	0.0004	7.57e-05	0.0052	0.0001
0.0015	0.0018	0.0098	0.0004	0.0168	1.34e-05	3.94e-05	3.81e-08	0.0259	0.0006	0.0143	0.0001	0.0089	1.41e-05	1.16e-06	1.17e-05	2.17e-05	2.08e-08	7.87e-09	2.67e-06	8.58e-06	0.0002	0.0004	7.39e-05	0.0052	0.0001
0.0015	0.0017	0.0097	0.0004	0.0165	1.31e-05	3.84e-05	3.66e-08	0.0256	0.0006	0.0141	0.0001	0.0088	1.37e-05	1.12e-06	1.14e-05	2.11e-05	2e-08	7.53e-09	2.59e-06	8.33e-06	0.0002	0.0004	7.2e-05	0.0051	0.0001
0.0015	0.0017	0.0096	0.0004	0.0163	1.28e-05	3.74e-05	3.52e-08	0.0252	0.0006	0.0139	0.0001	0.0087	1.34e-05	1.08e-06	1.1e-05	2.06e-05	1.92e-08	7.21e-09	2.51e-06	8.09e-06	0.0002	0.0004	7.03e-05	0.005	0.0001
0.0014	0.0017	0.0094	0.0003	0.016	1.25e-05	3.64e-05	3.38e-08	0.0249	0.0006	0.0137	0.0001	0.0085	1.3e-05	1.05e-06	1.07e-05	2e-05	1.84e-08	6.9e-09	2.43e-06	7.85e-06	0.0002	0.0003	6.85e-05	0.0049	0.0001
0.0014	0.0017	0.0093	0.0003	0.0158	1.22e-05	3.54e-05	3.25e-08	0.0246	0.0005	0.0135	0.0001	0.0084	1.27e-05	1.01e-06	1.04e-05	1.94e-05	1.77e-08	6.6e-09	2.36e-06	7.62e-06	0.0002	0.0003	6.68e-05	0.0048	0.0001
0.0014	0.0016	0.0092	0.0003	0.0156	1.19e-05	3.45e-05	3.13e-08	0.0242	0.0005	0.0133	0.0001	0.0083	1.23e-05	9.76e-07	1.01e-05	1.89e-05	1.7e-08	6.32e-09	2.29e-06	7.4e-06	0.0002	0.0003	6.52e-05	0.0048	0.0001
0.0013	0.0016	0.0091	0.0003	0.0153	1.16e-05	3.36e-05	3.01e-08	0.0239	0.0005	0.0131	0.0001	0.0082	1.2e-05	9.42e-07	9.8e-06	1.84e-05	1.63e-08	6.05e-09	2.22e-06	7.18e-06	0.0002	0.0003	6.36e-05	0.0047	0.0001
0.0013	0.0016	0.0089	0.0003	0.0151	1.13e-05	3.27e-05	2.89e-08	0.0236	0.0005	0.0129	0.0001	0.008	1.17e-05	9.11e-07	9.52e-06	1.79e-05	1.57e-08	5.79e-09	2.15e-06	6.97e-06	0.0002	0.0003	6.2e-05	0.0046	0.0001
0.0013	0.0016	0.0088	0.0003	0.0149	1.1e-05	3.19e-05	2.78e-08	0.0233	0.0005	0.0127	0.0001	0.0079	1.14e-05	8.8e-07	9.24e-06	1.74e-05	1.51e-08	5.54e-09	2.08e-06	6.77e-06	0.0002	0.0003	6.05e-05	0.0045	9.79e-05
0.0013	0.0015	0.0087	0.0003	0.0147	1.07e-05	3.1e-05	2.67e-08	0.023	0.0005	0.0125	0.0001	0.0078	1.11e-05	8.5e-07	8.97e-06	1.69e-05	1.45e-08	5.3e-09	2.02e-06	6.57e-06	0.0002	0.0003	5.9e-05	0.0045	9.56e-05
0.0012	0.0015	0.0086	0.0003	0.0144	1.05e-05	3.02e-05	2.57e-08	0.0227	0.0005	0.0124	0.0001	0.0077	1.08e-05	8.21e-07	8.71e-06	1.65e-05	1.39e-08	5.07e-09	1.96e-06	6.38e-06	0.0002	0.0003	5.75e-05	0.0044	9.34e-05
	0.0015		0.0003		1.02e-05		2.47e-08		0.0005		0.0001		1.05e-05		8.46e-06		1.34e-08		1.9e-06		0.0002		5.61e-05		9.13e-05
	0.0015		0.0003		9.95e-06		2.38e-08		0.0005		0.0001		1.03e-05		8.22e-06		1.29e-08		1.84e-06		0.0002		5.47e-05		8.92e-05
	0.0014		0.0003		9.71e-06		2.29e-08		0.0005		0.0001		1e-05		7.98e-06		1.24e-08		1.78e-06		0.0002		5.34e-05		8.71e-05
	0.0014		0.0003		9.47e-06		2.2e-08		0.0004		0.0001		9.74e-06		7.75e-06		1.19e-08		1.73e-06		0.0002		5.21e-05		8.51e-05
	0.0014		0.0003		9.24e-06		2.11e-08		0.0004		0.0001		9.49e-06		7.52e-06		1.14e-08		1.67e-06		0.0002		5.08e-05		8.32e-05
	0.0014		0.0003		9.01e-06		2.03e-08		0.0004		9.94e-05		9.24e-06		7.3e-06		1.1e-08		1.62e-06		0.0001		4.95e-05		8.12e-05
	0.0013		0.0003		8.78e-06		1.95e-08		0.0004		9.74e-05		9e-06		7.09e-06				1.57e-06		0.0001		4.83e-05		7.94e-05
	0.0013		0.0003		8.57e-06		1.88e-08		0.0004		9.55e-05		8.77e-06		6.89e-06				1.52e-06		0.0001		4.71e-05		7.76e-05
	0.0013		0.0002		8.36e-06		1.81e-08		0.0004		9.35e-05		8.54e-06		6.69e-06				1.48e-06		0.0001		4.59e-05		7.58e-05
	0.0013		0.0002		8.15e-06		1.74e-08		0.0004		9.16e-05		8.32e-06		6.49e-06				1.43e-06		0.0001		4.48e-05		7.4e-05
	0.0013		0.0002		7.95e-06		1.67e-08		0.0004		8.98e-05		8.1e-06						1.39e-06		0.0001		4.37e-05		7.23e-05
	0.0012		0.0002		7.75e-06		1.61e-08		0.0004		8.8e-05		7.89e-06						1.34e-06		0.0001		4.26e-05		7.07e-05
	0.0012		0.0002		7.56e-06		1.54e-08		0.0004		8.62e-05		7.69e-06						1.3e-06		0.0001		4.16e-05		6.9e-05
	0.0012		0.0002		7.37e-06		1.48e-08		0.0004		8.45e-05		7.49e-06						1.26e-06		0.0001		4.05e-05		6.75e-05
	0.0012		0.0002		7.19e-06		1.43e-08		0.0004		8.27e-05		7.29e-06						1.22e-06		0.0001		3.95e-05		6.59e-05
	0.0012		0.0002				1.37e-08		0.0004		8.11e-05		7.1e-06						1.19e-06		0.0001		3.86e-05		6.44e-05
	0.0012		0.0002				1.32e-08		0.0003		7.94e-05		6.92e-06						1.15e-06		0.0001		3.76e-05		6.29e-05
	0.0011		0.0002				1.27e-08		0.0003		7.78e-05		6.74e-06						1.11e-06		0.0001		3.67e-05		6.15e-05
			0.0002				1.22e-08		0.0003		7.63e-05		6.56e-06						1.08e-06		0.0001		3.58e-05		6e-05
																			1.05e-06						5.87e-05
																			1.01e-06						5.73e-05
																			9.83e-07						5.6e-05
																			9.53e-07						5.47e-05
																			9.24e-07
																			8.95e-07
																			8.68e-07

## Sheet: Fig 3Aiii inset
Gaut/Gahp at Gaut peak time point
0.301446
0.328846
0.194478
0.280777
0.363988
0.148413
0.30838
0.275727
0.100029
0.256028
0.604902

## Sheet: Fig 3Aiii main
	cell 1		cell 2		cell 3		cell 4		cell 5		cell 6		cell 7		cell 8		cell 9		cell 10		cell 11
time (ms)	Gahp	Gaut	Gahp	Gaut	Gahp	Gaut	Gahp	Gaut	Gahp	Gaut	Gahp	Gaut	Gahp	Gaut	Gahp	Gaut	Gahp	Gaut	Gahp	Gaut	Gahp	Gaut
0.1
0.2
0.3
0.4																	37.68				12.55
0.5	34		36.17		21.4286										34.04		35.5275				11.6848
0.6	32.7638		34.5627		20.8861				22.34						32.5917		33.4979				10.8793
0.7	31.5725		33.0269		20.3574				21.7598		20.2127				31.205		31.5843		20.957		10.1293
0.8	30.4245		31.5592		19.842				21.1946		19.6737		17.0454		29.8774		29.7799		20.1017		9.431
0.9	29.3183		30.1568		19.3397				20.6441		19.1491		16.6245		28.6062		28.0787		19.2814		8.7809
1	28.2523		28.8168		18.8501				20.108		18.6385		16.2141		27.3891		26.4747		18.4945		8.1756
1.1	27.2251		27.5362		18.3729		20.851		19.5857		18.1415		15.8138		26.2238		24.9623		17.7397		7.612
1.2	26.2352		26.3126		17.9078		20.2637		19.077		17.6578		15.4233		25.108		23.5362		17.0158		7.0872
1.3	25.2813		25.1434		17.4545		19.6929		18.5815		17.1869		15.0425		24.0398		22.1917		16.3213		6.5986
1.4	24.3621		24.0261		17.0126		19.1382	5.22222	18.0989		16.7286		14.6711		23.017		20.9239		15.6552		6.1437
1.5	23.4763		22.9584		16.582		18.5992	5.0772	17.6288	6.41667	16.2826		14.3089		22.0377		19.7286		15.0163		5.7202
1.6	22.6227		21.9382	7.21429	16.1622		18.0753	4.93613	17.171	6.29873	15.8484		13.9556		21.1001		18.6016		14.4035		5.3259
1.7	21.8001		20.9633	7.01107	15.753		17.5661	4.79901	16.725	6.18293	15.4258		13.611	4.09375	20.2023	5.33333	17.5389		13.8157	3.39286	4.9587
1.8	21.0075		20.0318	6.8136	15.3542		17.0714	4.66577	16.2906	6.06927	15.0145		13.275	4.02002	19.3428	5.25155	16.537		13.2519	3.30904	4.6169
1.9	20.2437		19.1416	6.62169	14.9655		16.5905	4.53614	15.8675	5.9577	14.6141		12.9472	3.94758	18.5198	5.17097	15.5923		12.7111	3.22734	4.2986
2	19.5076		18.291	6.43514	14.5867		16.1232	4.41017	15.4554	5.84822	14.2244		12.6275	3.87642	17.7318	5.09166	14.7016	1.47059	12.1923	3.14775	4.0023
2.1	18.7983	5.66667	17.4783	6.25391	14.2174		15.6691	4.28766	15.054	5.74068	13.8451		12.3158	3.80654	16.9774	5.01356	13.8617	1.42919	11.6947	3.06999	3.7264
2.2	18.1148	5.51141	16.7016	6.07774	13.8575		15.2277	4.16853	14.663	5.63518	13.4759	2	12.0117	3.73796	16.2551	4.93667	13.0698	1.3889	11.2175	2.99415	3.4695
2.3	17.4562	5.36045	15.9594	5.90655	13.5067		14.7988	4.0528	14.2821	5.53161	13.1166	1.97038	11.7151	3.67066	15.5635	4.86099	12.3232	1.34978	10.7597	2.92024	3.2303
2.4	16.8215	5.21358	15.2502	5.74018	13.1648		14.3819	3.94024	13.9112	5.42989	12.7668	1.94119	11.4259	3.60454	14.9013	4.78641	11.6192	1.31176	10.3206	2.84817	3.0076
2.5	16.2099	5.07075	14.5725	5.5785	12.8315		13.9768	3.83078	13.5499	5.33011	12.4264	1.91243	11.1438	3.53959	14.2673	4.71303	10.9554	1.27485	9.8994	2.77783	2.8003
2.6	15.6205	4.93184	13.925	5.42139	12.5067		13.5832	3.72436	13.198	5.23212	12.0951	1.88411	10.8686	3.47583	13.6603	4.64075	10.3296	1.2389	9.4954	2.70924	2.6072
2.7	15.0525	4.79672	13.3062	5.26867	12.1901		13.2006	3.62091	12.8552	5.13597	11.7726	1.85616	10.6003	3.41314	13.0791	4.56956	9.7395	1.20404	9.1079	2.64239	2.4275
2.8	14.5052	4.66533	12.7149	5.12024	11.8815		12.8287	3.52034	12.5213	5.04156	11.4586	1.8287	10.3386	3.35173	12.5226	4.49947	9.1831	1.17007	8.7362	2.5771	2.2602
2.9	13.9778	4.53749	12.1499	4.97605	11.5807		12.4674	3.42253	12.1961	4.94884	11.1531	1.80157	10.0833	3.29129	11.9898	4.43047	8.6585	1.13713	8.3796	2.51347	2.1043
3	13.4696	4.41321	11.61	4.83586	11.2875		12.1162	3.32747	11.8793	4.85791	10.8557	1.77492	9.8343	3.23203	11.4797	4.36251	8.1639	1.10515	8.0377	2.45148	1.9593	1.18519
3.1	12.9798	4.29229	11.0941	4.69967	11.0018		11.7749	3.2351	11.5708	4.76858	10.5662	1.74859	9.5915	3.17373	10.9913	4.29558	7.6975	1.07397	7.7096	2.39086	1.8242	1.16699
3.2	12.5079	4.17473	10.6011	4.56728	10.7233		11.4433	3.14519	11.2703	4.68093	10.2845	1.7227	9.3547	3.11661	10.5236	4.22975	7.2578	1.04375	7.395	2.3319	1.6985	1.14912
3.3	12.0531	4.06036	10.13	4.43864	10.4518		11.1209	3.05782	10.9776	4.59488	10.0102	1.69719	9.1237	3.06045	10.0759	4.16484	6.8431	1.01434	7.0932	2.27431	1.5814	1.1315
3.4	11.6149	3.9491	9.6799	4.31361	10.1872	1.93103	10.8077	2.97293	10.6924	4.51042	9.7433	1.67205	8.8985	3.00526	9.6472	4.10096	6.4522	0.985735	6.8037	2.2181	1.4724	1.11414
3.5	11.1926	3.84091	9.2497	4.19213	9.9293	1.89802	10.5033	2.89036	10.4147	4.42755	9.4835	1.64724	8.6788	2.95114	9.2367	4.03807	6.0836	0.958015	6.5261	2.16336	1.3709	1.09703
3.6	10.7856	3.73572	8.8387	4.07402	9.678	1.86556	10.2074	2.81005	10.1442	4.34612	9.2306	1.62286	8.4645	2.89799	8.8437	3.97616	5.7361	0.931029	6.2597	2.10999	1.2764	1.08025
3.7	10.3934	3.63334	8.4459	3.95928	9.433	1.83371	9.9199	2.732	9.8808	4.26624	8.9845	1.59881	8.2555	2.84569	8.4675	3.91516	5.4084	0.904779	6.0043	2.05791	1.1884	1.06366
3.8	10.0155	3.53383	8.0706	3.84775	9.1942	1.80235	9.6405	2.65614	9.6241	4.18784	8.7449	1.57514	8.0517	2.79447	8.1072	3.85509	5.0994	0.879338	5.7592	2.0071	1.1064	1.04732
3.9	9.6514	3.43702	7.712	3.73939	8.9614	1.77156	9.369	2.58232	9.3742	4.11084	8.5117	1.55178	7.8529	2.7441	7.7623	3.796	4.8081	0.854559	5.5242	1.9575	1.0302	1.0313
4	9.3005	3.34284	7.3693	3.63405	8.7346	1.74126	9.1051	2.51062	9.1307	4.03529	8.2848	1.52881	7.659	2.69469	7.432	3.73777	4.5334	0.830441	5.2988	1.90917	0.9591	1.01548
4.1	8.9623	3.2513	7.0418	3.53169	8.5135	1.71152	8.8486	2.44089	8.8935	3.96112	8.0639	1.50616	7.4699	2.64615	7.1158	3.68046	4.2745	0.807059	5.0825	1.86204	0.893	0.999912
4.2	8.6364	3.1622	6.7289	3.4322	8.2979	1.68222	8.5994	2.37308	8.6626	3.8883	7.8488	1.48384	7.2855	2.59846	6.8131	3.62402	4.0303	0.784338	4.8751	1.8161	0.8315	0.984537
4.3	8.3224	3.07554	6.4299	3.33553	8.0879	1.65348	8.3571	2.30716	8.4376	3.81682	7.6395	1.46189	7.1056	2.55163	6.5232	3.56844	3.8	0.762279	4.6761	1.77125	0.7741	0.969417
4.4	8.0198	2.99134	6.1442	3.2416	7.8831	1.62523	8.1217	2.24309	8.2184	3.74669	7.4358	1.44022	6.9301	2.50565	6.2456	3.51366	3.583	0.740809	4.4853	1.72751	0.7208	0.954555
4.5	7.7282	2.90934	5.8711	3.1503	7.6836	1.59743	7.893	2.18077	8.005	3.67779	7.2376	1.41886	6.759	2.46054	5.9799	3.45981	3.3783	0.719926	4.3023	1.68487	0.6711	0.939948
4.6	7.4472	2.82966	5.6102	3.06154	7.4891	1.57013	7.6707	2.12022	7.7971	3.6102	7.0446	1.39784	6.5922	2.41617	5.7255	3.40671	3.1853	0.699632	4.1267	1.64324	0.6248	0.925534
4.7	7.1765	2.75213	5.3609	2.97531	7.2995	1.54327	7.4546	2.0613	7.5946	3.54384	6.8567	1.37714	6.4294	2.37266	5.4819	3.35447	3.0033	0.679926	3.9583	1.60271	0.5818	0.911311
4.8	6.9155	2.67674	5.1227	2.89151	7.1147	1.51692	7.2446	2.00406	7.3973	3.47868	6.6739	1.35676	6.2707	2.3299	5.2487	3.30304	2.8317	0.660809	3.7967	1.5631	0.5416	0.897345
4.9	6.6641	2.60342	4.8951	2.81006	6.9346	1.491	7.0406	1.94838	7.2052	3.41476	6.4959	1.33665	6.1158	2.28789	5.0253	3.25235	2.67	0.642132	3.6418	1.52449	0.5043	0.883572
5	6.4218	2.53207	4.6776	2.7309	6.759	1.46548	6.8422	1.89426	7.018	3.35199	6.3227	1.31686	5.9648	2.24674	4.8115	3.20248	2.5175	0.624044	3.4932	1.4869	0.4695	0.870054
5.1	6.1883	2.46274	4.4697	2.65398	6.5879	1.44045	6.6495	1.84168	6.8358	3.29036	6.1541	1.29735	5.8176	2.20623	4.6068	3.15341	2.3736	0.606471	3.3506	1.45013	0.4372	0.856665
5.2	5.9633	2.39524	4.2711	2.57925	6.4211	1.41581	6.4622	1.79052	6.6582	3.22987	5.99	1.27811	5.6739	2.16647	4.4108	3.10503	2.238	0.589412	3.2139	1.41436	0.407	0.843532
5.3	5.7465	2.32964	4.0813	2.50657	6.2586	1.39162	6.2802	1.74076	6.4853	3.17048	5.8303	1.25919	5.5338	2.12746	4.2231	3.05739	2.1102	0.572794	3.0827	1.37943	0.379	0.830591
5.4	5.5375	2.26581	3.8999	2.43599	6.1002	1.36782	6.1033	1.69242	6.3169	3.11223	5.6748	1.24054	5.3972	2.0891	4.0435	3.01051	1.9896	0.556691	2.9569	1.34541	0.3529	0.817906
5.5	5.3362	2.20376	3.7266	2.36736	5.9457	1.34446	5.9314	1.64542	6.1528	3.05503	5.5235	1.22216	5.2639	2.05148	3.8714	2.96432	1.876	0.541029	2.8362	1.31212	0.3285	0.805349
5.6	5.1422	2.14336	3.561	2.30067	5.7952	1.32148	5.7643	1.59969	5.993	2.99887	5.3762	1.20405	5.134	2.01451	3.7067	2.91888	1.7688	0.525735	2.7205	1.27975	0.3059	0.792985
5.7	4.9552	2.08467	3.4028	2.23589	5.6485	1.2989	5.602	1.5553	5.8373	2.94371	5.2329	1.18622	5.0072	1.97818	3.549	2.87413	1.6678	0.510956	2.6094	1.2482	0.2848	0.780813
5.8	4.775	2.02752	3.2516	2.17291	5.5055	1.2767	5.4442	1.51205	5.6857	2.88964	5.0933	1.16865	4.8836	1.9426	3.398	2.83001	1.5725	0.496544	2.503	1.2173	0.2652	0.768833
5.9	4.6014	1.97201	3.1071	2.11169	5.3661	1.25484	5.2908	1.47006	5.538	2.83651	4.9575	1.1513	4.763	1.90756	3.2534	2.78664	1.4827	0.482574	2.4008	1.18732	0.2469	0.757045
6	4.4341	1.91798	2.969	2.05222	5.2303	1.23342	5.1418	1.42927	5.3942	2.78439	4.8253	1.13427	4.6454	1.87316	3.115	2.7439	1.398	0.468971	2.3028	1.15797	0.2299	0.745449
6.1	4.2729	1.86541	2.8371	1.99441	5.0979	1.21233	4.997	1.38953	5.2541	2.7332	4.6967	1.11746	4.5307	1.8394	2.9825	2.7018	1.3181	0.455735	2.2089	1.12936	0.214	0.733982
6.2	4.1175	1.81431	2.711	1.93825	4.9688	1.19158	4.8562	1.35093	5.1176	2.68296	4.5714	1.10092	4.4189	1.80629	2.8556	2.66033	1.2428	0.442941	2.1187	1.10149	0.1993	0.722771
6.3	3.9678	1.76462	2.5905	1.88366	4.8431	1.17122	4.7194	1.31346	4.9847	2.63362	4.4495	1.08459	4.3098	1.77371	2.7341	2.61955	1.1718	0.430441	2.0322	1.07434	0.1855	0.711688
6.4	3.8235	1.71628	2.4754	1.83058	4.7205	1.15119	4.5865	1.27697	4.8553	2.58522	4.3309	1.06854	4.2033	1.74177	2.6178	2.57935	1.1049	0.418309	1.9493	1.04775	0.1727	0.700733
6.5	3.6845	1.66928	2.3654	1.779	4.601	1.13154	4.4573	1.24148	4.7292	2.53767	4.2154	1.0527	4.0996	1.71037	2.5064	2.53984	1.0417	0.406544	1.8698	1.02189	0.1608	0.690034
6.6	3.5505	1.62351	2.2603	1.72889	4.4845	1.11218	4.3318	1.20697	4.6063	2.49106	4.103	1.03708	3.9983	1.67962	2.3997	2.50085	0.9822	0.395074	1.7934	0.996675	0.1497	0.679399
6.7	3.4214	1.57908	2.1599	1.6802	4.371	1.0932	4.2097	1.17345	4.4867	2.44525	3.9936	1.02173	3.8996	1.64929	2.2976	2.46249	0.9261	0.383971	1.7203	0.972099	0.1394	0.669021
6.8	3.297	1.53581	2.0639	1.63287	4.2603	1.0745	4.0912	1.14084	4.3702	2.40033	3.8871	1.00659	3.8033	1.6196	2.1999	2.42471	0.8732	0.373162	1.6501	0.948074	0.1298	0.658771
6.9	3.1772	1.49371	1.9722	1.5869	4.1525	1.05613	3.9759	1.10916	4.2567	2.35616	3.7834	0.991676	3.7094	1.59045	2.1063	2.38756	0.8233	0.362647	1.5827	0.924691	0.1209	0.648649
7	3.0616	1.45277	1.8845	1.5422	4.0473	1.0381	3.8639	1.07839	4.1461	2.31289	3.6826	0.976973	3.6179	1.56173	2.0167	2.35093	0.7763	0.352426	1.5181	0.901858	0.1125	0.638719
7.1	2.9503	1.41299	1.8008	1.49877	3.9449	1.02034	3.7551	1.0484	4.0384	2.27036	3.5844	0.962541	3.5285	1.53366	1.9309	2.31487	0.7319	0.3425	1.4562	0.879575	0.1048	0.628917
7.2	2.8431	1.37426	1.7208	1.45655	3.845	1.00286	3.6493	1.01932	3.9335	2.22862	3.4888	0.94827	3.4414	1.50601	1.8487	2.2794	0.6901	0.332868	1.3967	0.857843	0.0975	0.619243
7.3	2.7397	1.33662	1.6443	1.41551	3.7477	0.985771	3.5465	0.991023	3.8314	2.18764	3.3958	0.934216	3.3564	1.47889	1.7701	2.24443	0.6507	0.323456	1.3397	0.83666	0.0908	0.609762
7.4	2.6401	1.30003	1.5712	1.37564	3.6528	0.968902	3.4466	0.9635	3.7319	2.14744	3.3052	0.920378	3.2736	1.45221	1.6948	2.20999	0.6135	0.314338	1.2851	0.816028	0.0846	0.600408
7.5	2.5441	1.26441	1.5014	1.33689	3.5603	0.952311	3.3496	0.936683	3.6349	2.10795	3.2171	0.906757	3.1927	1.42606	1.6226	2.17607	0.5785	0.305515	1.2326	0.795854	0.0787	0.591183
7.6	2.4516	1.22978	1.4347	1.29925	3.4702	0.936052	3.2552	0.910713	3.5405	2.0692	3.1313	0.893297	3.1139	1.40034	1.5536	2.14272	0.5454	0.296912	1.1823	0.776231	0.0733	0.58215
7.7	2.3624	1.19606	1.3709	1.26265	3.3824	0.920071	3.1635	0.885378	3.4486	2.0312	3.0478	0.880054	3.037	1.37516	1.4875	2.10983	0.5143	0.288529	1.1341	0.757066	0.0683	0.573181
7.8	2.2765	1.16332	1.31	1.22706	3.2967	0.904312	3.0744	0.86082	3.359	1.99384	2.9665	0.867027	2.962	1.3504	1.4242	2.07752	0.4849	0.280441	1.0878	0.738359	0.0635	0.564404
7.9	2.1938	1.13144	1.2518	1.1925	3.2133	0.888886	2.9878	0.836896	3.2718	1.95718	2.8874	0.854216	2.8889	1.32607	1.3636	2.04562	0.4572	0.2725	1.0434	0.720111	0.0592	0.555756
8	2.114	1.10047	1.1962	1.15892	3.1319	0.873682	2.9037	0.813679	3.1868	1.92122	2.8104	0.841514	2.8176	1.30218	1.3056	2.01428	0.4311	0.264853	1.0008	0.702321	0.0551	0.547235
8.1	2.0371	1.0703	1.143	1.12626	3.0526	0.858755	2.8219	0.791026	3.104	1.8859	2.7355	0.829081	2.748	1.27871	1.2501	1.98335	0.4065	0.257353	0.96	0.68499	0.0513	0.538843
8.2	1.9631	1.04099	1.0922	1.09457	2.9754	0.844051	2.7424	0.769078	3.0234	1.85123	2.6625	0.816811	2.6802	1.25567	1.1969	1.95294	0.3832	0.250147	0.9208	0.668118	0.0478	0.530579
8.3	1.8917	1.01247	1.0437	1.06372	2.9	0.829623	2.6651	0.747695	2.9449	1.81721	2.5916	0.804703	2.614	1.23305	1.1459	1.92299	0.3613	0.243088	0.8832	0.651612	0.0445	0.522442
8.4	1.8229	0.98469	0.9973	1.03379	2.8266	0.815474	2.5901	0.726947	2.8684	1.78378	2.5224	0.792757	2.5495	1.21076	1.0972	1.89351	0.3407	0.23625	0.8472	0.635473	0.0414	0.514434
8.5	1.7566	0.957765	0.953	1.00464	2.7551	0.80149	2.5171	0.706764	2.7939	1.751	2.4552	0.781027	2.4865	1.18901	1.0505	1.86448	0.3212	0.229559	0.8126	0.619792	0.0385	0.506555
8.6	1.6928	0.931512	0.9107	0.976366	2.6853	0.787784	2.4462	0.687146	2.7213	1.71882	2.3897	0.769459	2.4251	1.16758	1.0058	1.83585	0.3029	0.223088	0.7794	0.604479	0.0359	0.498739
8.7	1.6312	0.905994	0.8702	0.948825	2.6173	0.774356	2.3773	0.668021	2.6506	1.68724	2.326	0.758054	2.3652	1.14657	0.963	1.80769	0.2856	0.216838	0.7476	0.589624	0.0334	0.491115
8.8	1.5719	0.881148	0.8315	0.922112	2.5511	0.761094	2.3104	0.649461	2.5818	1.65625	2.264	0.746811	2.3068	1.12589	0.922	1.77999	0.2693	0.210735	0.7171	0.575043	0.0311	0.483556
8.9	1.5147	0.857037	0.7946	0.896131	2.4865	0.748109	2.2453	0.631465	2.5147	1.62575	2.2036	0.735784	2.2499	1.10563	0.8828	1.75269	0.2539	0.204779	0.6878	0.56083	0.029	0.476188
9	1.4597	0.833539	0.7593	0.870881	2.4236	0.735291	2.182	0.613893	2.4494	1.59591	2.1448	0.724865	2.1943	1.0857	0.8453	1.72579	0.2394	0.199044	0.6598	0.546984	0.027	0.468885
9.1	1.4066	0.810713	0.7255	0.846362	2.3622	0.722751	2.1206	0.596815	2.3858	1.56656	2.0877	0.714108	2.1402	1.06609	0.8093	1.69935	0.2257	0.193382	0.6328	0.533504	0.0251	0.461646
9.2	1.3555	0.788499	0.6933	0.822526	2.3024	0.710377	2.0608	0.580302	2.3238	1.53776	2.032	0.703568	2.0873	1.04691	0.7749	1.67326	0.2128	0.187941	0.607	0.520299	0.0234	0.454599
9.3	1.3062	0.766897	0.6625	0.799372	2.2441	0.698224	2.0028	0.564141	2.2635	1.50951	1.9778	0.693135	2.0358	1.02805	0.7419	1.64763	0.2007	0.182647	0.5822	0.507461	0.0218	0.447616
9.4	1.2587	0.745907	0.633	0.776852	2.1873	0.686294	1.9464	0.548474	2.2047	1.48175	1.9251	0.682865	1.9855	1.00951	0.7103	1.62235	0.1892	0.1775	0.5585	0.494899	0.0203	0.440761
9.5	1.2129	0.725468	0.6049	0.754965	2.1319	0.674586	1.8916	0.533231	2.1474	1.45449	1.8737	0.672757	1.9365	0.991288	0.6801	1.59747	0.1784	0.1725	0.5357	0.482703	0.0189	0.43397
9.6	1.1688	0.70558	0.578	0.733712	2.078	0.663044	1.8383	0.518411	2.0917	1.42778	1.8238	0.662757	1.8887	0.973498	0.6512	1.57293	0.1682	0.167647	0.5138	0.470782	0.0176	0.427307
9.7	1.1263	0.686242	0.5523	0.713044	2.0254	0.651724	1.7865	0.504015	2.0373	1.40152	1.7751	0.652973	1.8421	0.955923	0.6235	1.54886	0.1586	0.162941	0.4929	0.459136	0.0164	0.420773
9.8	1.0854	0.667455	0.5278	0.692961	1.9741	0.640571	1.7362	0.490042	1.9844	1.37575	1.7278	0.643297	1.7966	0.938669	0.5969	1.52507	0.1495	0.158382	0.4727	0.447857	0.0152	0.414302
9.9	1.0459	0.649158	0.5043	0.673415	1.9241	0.629639	1.6873	0.476422	1.9329	1.35048	1.6817	0.63373	1.7522	0.921737	0.5715	1.50168	0.141	0.153897	0.4535	0.436762	0.0142	0.40796
10	1.0079	0.631411	0.4819	0.654453	1.8754	0.618874	1.6398	0.463225	1.8827	1.32566	1.6369	0.624378	1.709	0.905126	0.5472	1.47865	0.1329	0.149559	0.4349	0.426033	0.0132	0.401682
10.1	0.9712	0.614093	0.4605	0.636027	1.8279	0.608276	1.5936	0.450311	1.8338	1.30129	1.5932	0.615081	1.6668	0.888837	0.5239	1.45595	0.1253	0.145368	0.4172	0.415487	0.0123	0.395532
10.2	0.9359	0.597264	0.4401	0.618138	1.7817	0.597899	1.5487	0.43782	1.7862	1.27736	1.5508	0.606	1.6256	0.872869	0.5016	1.43366	0.1182	0.14125	0.4002	0.405217	0.0114	0.38951
10.3	0.9019	0.580925	0.4205	0.600687	1.7366	0.587689	1.5051	0.425682	1.7398	1.25389	1.5094	0.597027	1.5855	0.857116	0.4803	1.41166	0.1114	0.137279	0.3838	0.395222	0.0107	0.383487
10.4	0.8691	0.565014	0.4018	0.583772	1.6926	0.577646	1.4627	0.413826	1.6946	1.23086	1.4692	0.588162	1.5463	0.841684	0.4599	1.39001	0.1051	0.133382	0.3682	0.385502	0.0099	0.377658
10.5	0.8375	0.549532	0.384	0.567345	1.6497	0.567769	1.4215	0.402323	1.6506	1.20822	1.43	0.579459	1.5081	0.826466	0.4403	1.3687	0.0991	0.129632	0.3532	0.375965	0.0092	0.371828
10.6	0.807	0.534478	0.3669	0.551357	1.608	0.558058	1.3814	0.391173	1.6077	1.18599	1.3919	0.570865	1.4709	0.81157	0.4216	1.34767	0.0934	0.126029	0.3387	0.366612	0.0086	0.366126
10.7	0.7777	0.519791	0.3506	0.535807	1.5673	0.548514	1.3425	0.380305	1.5659	1.1642	1.3547	0.562432	1.4346	0.796995	0.4036	1.32706	0.0881	0.122426	0.3249	0.357625	0.008	0.360488
10.8	0.7494	0.505594	0.335	0.520745	1.5276	0.539136	1.3047	0.369719	1.5253	1.14281	1.3186	0.554108	1.3992	0.782635	0.3865	1.30667	0.083	0.118971	0.3117	0.348731	0.0075	0.354979
10.9	0.7222	0.491703	0.3201	0.506072	1.4889	0.529925	1.268	0.359486	1.4857	1.12177	1.2835	0.545892	1.3646	0.768489	0.37	1.28662	0.0783	0.115662	0.2989	0.340203	0.0069	0.349534
11	0.6959	0.47824	0.3059	0.491839	1.4512	0.52088	1.2322	0.349465	1.4471	1.10118	1.2492	0.537784	1.3309	0.754665	0.3543	1.26693	0.0738	0.112426	0.2867	0.331766	0.0065	0.344216
11.1	0.6706	0.465144	0.2923	0.477946	1.4145	0.511946	1.1975	0.339797	1.4095	1.08093	1.2159	0.529838	1.2981	0.741054	0.3392	1.24746	0.0696	0.109191	0.275	0.323605	0.006	0.338899
11.2	0.6462	0.452415	0.2793	0.464493	1.3787	0.503179	1.1638	0.330341	1.3729	1.06104	1.1835	0.522	1.266	0.727766	0.3248	1.22834	0.0656	0.106176	0.2638	0.315627	0.0056	0.33371
11.3	0.6227	0.439993	0.2669	0.451429	1.3438	0.494578	1.131	0.321167	1.3372	1.04154	1.1519	0.514216	1.2348	0.714584	0.311	1.2095	0.0619	0.103162	0.253	0.307833	0.0052	0.328585
11.4	0.6001	0.427937	0.255	0.438707	1.3098	0.486143	1.0992	0.312275	1.3025	1.02239	1.1212	0.506649	1.2043	0.701724	0.2977	1.19096	0.0583	0.100221	0.2427	0.300222	0.0049	0.323524
11.5	0.5783	0.416249	0.2437	0.426325	1.2766	0.47782	1.0682	0.303595	1.2687	1.00364	1.0913	0.499135	1.1745	0.689079	0.2851	1.1727	0.055	0.0974265	0.2328	0.292794	0.0045	0.318591
11.6	0.5572	0.404806	0.2329	0.414334	1.2443	0.469663	1.0381	0.295126	1.2357	0.985182	1.0622	0.49173	1.1455	0.676648	0.2729	1.15467	0.0519	0.0947059	0.2233	0.28555	0.0042	0.313722
11.7	0.537	0.393729	0.2225	0.402684	1.2128	0.461617	1.0089	0.28694	1.2036	0.967076	1.0339	0.484432	1.1173	0.664538	0.2613	1.13699	0.0489	0.0919853	0.2142	0.278489	0.0039	0.308917
11.8	0.5175	0.382959	0.2126	0.391326	1.1821	0.453738	0.9805	0.278965	1.1724	0.949269	1.0063	0.477243	1.0897	0.652535	0.2502	1.11954	0.0461	0.0894118	0.2055	0.271612	0.0036	0.304176
11.9	0.4986	0.372433	0.2032	0.38031	1.1522	0.445969	0.9528	0.271203	1.1419	0.931809	0.9795	0.470216	1.0628	0.640747	0.2396	1.10238	0.0435	0.0869118	0.1971	0.264918	0.0034	0.299499
12	0.4805	0.362275	0.1942	0.369586	1.123	0.438367	0.926	0.263722	1.1122	0.914698	0.9534	0.463243	1.0365	0.629173	0.2294	1.08544	0.041	0.0844853	0.189	0.258407	0.0032	0.294887
12.1	0.463	0.352361	0.1855	0.359154	1.0946	0.430876	0.8999	0.256383	1.0834	0.897886	0.928	0.456378	1.0109	0.61792	0.2196	1.0688	0.0386	0.0820588	0.1813	0.251988	0.0029	0.290402
12.2	0.4462	0.342693	0.1773	0.349064	1.0669	0.423496	0.8746	0.249255	1.0552	0.881371	0.9032	0.449622	0.986	0.606775	0.2103	1.05244	0.0364	0.0797794	0.1739	0.245753	0.0027	0.285918
12.3	0.43	0.333269	0.1694	0.339218	1.0399	0.416282	0.8499	0.242339	1.0278	0.865205	0.8791	0.442919	0.9616	0.595844	0.2013	1.03631	0.0344	0.0775	0.1668	0.239701	0.0026	0.281562
12.4	0.4143	0.32415	0.1619	0.329664	1.0135	0.40918	0.826	0.235565	1.0011	0.849288	0.8557	0.436378	0.9379	0.585128	0.1927	1.02042	0.0324	0.0753676	0.16	0.233832	0.0024	0.277205
12.5	0.3993	0.315277	0.1547	0.320402	0.9879	0.402132	0.8027	0.229072	0.9751	0.833669	0.8329	0.429892	0.9147	0.574518	0.1845	1.00475	0.0305	0.0732353	0.1535	0.228055	0.0022	0.272977
12.6	0.3848	0.306649	0.1478	0.311384	0.9629	0.395307	0.7801	0.22265	0.9498	0.818349	0.8107	0.423568	0.8922	0.56423	0.1767	0.989316	0.0288	0.0711765	0.1472	0.22237	0.0021	0.268749
12.7	0.3708	0.298265	0.1412	0.30261	0.9385	0.388537	0.7581	0.216511	0.9251	0.803327	0.789	0.417297	0.8701	0.554049	0.1692	0.974168	0.0272	0.0691176	0.1412	0.216868	0.0019	0.264649
12.8	0.3573	0.290065	0.135	0.29408	0.9147	0.381879	0.7368	0.210512	0.9011	0.788554	0.768	0.411081	0.8486	0.544083	0.162	0.959194	0.0256	0.0672059	0.1354	0.211549	0.0018	0.260613
12.9	0.3443	0.282109	0.129	0.285793	0.8916	0.375331	0.716	0.204655	0.8777	0.774029	0.7475	0.405027	0.8277	0.534224	0.1551	0.944507	0.0241	0.0652941	0.1299	0.206322	0.0017	0.256577
13	0.3318	0.274399	0.1232	0.27775	0.869	0.36895	0.6959	0.198938	0.8549	0.759803	0.7276	0.399027	0.8073	0.524579	0.1485	0.93005	0.0228	0.0634559	0.1246	0.201187	0.0015	0.252669
13.1	0.3197	0.266872	0.1178	0.269902	0.847	0.362624	0.6763	0.193434	0.8327	0.745826	0.7082	0.393081	0.7873	0.515148	0.1422	0.915767	0.0215	0.0616912	0.1195	0.196236	0.0014	0.248761
13.2	0.3081	0.25959	0.1125	0.262298	0.8256	0.356409	0.6572	0.188071	0.8111	0.732147	0.6893	0.387243	0.7679	0.505932	0.1361	0.901713	0.0202	0.0599265	0.1147	0.191375	0.0013	0.244981
13.3	0.2969	0.25243	0.1075	0.254937	0.8047	0.350361	0.6387	0.182848	0.79	0.718667	0.6709	0.381514	0.7489	0.496823	0.1303	0.887891	0.0191	0.0582353	0.11	0.186699	0.0013	0.241201
13.4	0.2861	0.245515	0.1028	0.247723	0.7843	0.344368	0.6207	0.177767	0.7695	0.705485	0.653	0.375892	0.7304	0.487821	0.1248	0.87424	0.018	0.0566176	0.1055	0.182114	0.0012	0.237485
13.5	0.2757	0.238844	0.0982	0.240752	0.7644	0.338486	0.6032	0.172827	0.7495	0.692503	0.6356	0.370324	0.7124	0.479033	0.1195	0.860878	0.017	0.055	0.1012	0.177621	0.0011	0.233898
13.6	0.2657	0.232297	0.0938	0.233977	0.7451	0.33266	0.5862	0.168029	0.73	0.679769	0.6187	0.364811	0.6948	0.470353	0.1144	0.847631	0.016	0.0534559	0.0971	0.173219	0.001	0.23031
13.7	0.256	0.225932	0.0897	0.227396	0.7262	0.327	0.5697	0.163371	0.7111	0.667284	0.6022	0.359405	0.6777	0.461886	0.1095	0.834672	0.0151	0.0519853	0.0931	0.168909	0.0009	0.226723
13.8	0.2467	0.21969	0.0857	0.221011	0.7078	0.321395	0.5537	0.158784	0.6926	0.654997	0.5861	0.354108	0.6609	0.453635	0.1049	0.821829	0.0142	0.0505147	0.0893	0.164783	0.0009	0.223263
13.9	0.2377	0.213693	0.0819	0.214771	0.6899	0.315902	0.5381	0.154408	0.6746	0.64296	0.5705	0.348865	0.6446	0.445383	0.1004	0.809273	0.0134	0.0490441	0.0856	0.160656	0.0008	0.219868
14	0.2291	0.207819	0.0782	0.208727	0.6725	0.310519	0.5229	0.150104	0.6571	0.631171	0.5553	0.343676	0.6287	0.437453	0.0961	0.796832	0.0126	0.0477206	0.0822	0.156713	0.0008	0.216472
14.1	0.2208	0.202127	0.0748	0.202829	0.6554	0.305192	0.5082	0.14594	0.64	0.619532	0.5405	0.338595	0.6132	0.429522	0.092	0.784622	0.0119	0.0463235	0.0788	0.152862	0.0007	0.213141
14.2	0.2127	0.19662	0.0714	0.197125	0.6388	0.299976	0.4939	0.141917	0.6234	0.608141	0.5261	0.333568	0.598	0.421806	0.0881	0.772585	0.0112	0.0450735	0.0756	0.149102	0.0007	0.209874
14.3	0.205	0.191235	0.0683	0.191569	0.6227	0.294871	0.48	0.137965	0.6072	0.596999	0.512	0.328649	0.5833	0.414197	0.0844	0.76072	0.0106	0.04375	0.0725	0.145434	0.0006	0.206671
14.4	0.1975	0.185972	0.0652	0.186158	0.6069	0.289822	0.4665	0.134084	0.5914	0.586006	0.4984	0.323784	0.5689	0.406696	0.0808	0.749086	0.01	0.0425735	0.0695	0.141766	0.0006	0.203532
14.5	0.1904	0.180893	0.0623	0.180942	0.5915	0.284883	0.4533	0.130414	0.5761	0.575212	0.4851	0.318973	0.5548	0.399409	0.0773	0.737567	0.0094	0.0413235	0.0667	0.138282	0.0005	0.200392
14.6	0.1834	0.175936	0.0596	0.175824	0.5766	0.28	0.4405	0.126745	0.5611	0.564667	0.4722	0.314216	0.5411	0.392228	0.0741	0.726278	0.0089	0.0401471	0.064	0.134889	0.0005	0.197317
14.7	0.1768	0.171102	0.0569	0.170901	0.562	0.275228	0.4281	0.123216	0.5465	0.554271	0.4596	0.309568	0.5278	0.385155	0.0709	0.715104	0.0084	0.0390441	0.0614	0.131588	0.0005	0.194306
14.8	0.1703	0.166451	0.0544	0.166075	0.5477	0.270511	0.4161	0.119829	0.5323	0.544074	0.4473	0.304973	0.5147	0.37819	0.0679	0.704161	0.0079	0.0379412	0.0589	0.128287	0.0004	0.191295
14.9	0.1642	0.161861	0.052	0.161395	0.5339	0.265906	0.4044	0.116512	0.5185	0.534076	0.4354	0.300486	0.502	0.371331	0.065	0.693333	0.0074	0.0369118	0.0565	0.125169	0.0004	0.188348
15	0.1582	0.157455	0.0497	0.156862	0.5204	0.261356	0.393	0.113266	0.5051	0.524276	0.4238	0.296054	0.4896	0.364687	0.0622	0.682736	0.007	0.0358088	0.0542	0.122051	0.0004	0.185465
15.1	0.1524	0.15311	0.0474	0.152426	0.5072	0.256861	0.3819	0.11009	0.4919	0.514627	0.4125	0.291622	0.4775	0.35815	0.0596	0.672253	0.0066	0.0348529	0.0519	0.119025	0.0003	0.182647
15.2	0.1469	0.148949	0.0453	0.148137	0.4944	0.252477	0.3711	0.107056	0.4792	0.505176	0.4015	0.287297	0.4657	0.351612	0.0571	0.661944	0.0062	0.0338235	0.0498	0.116091	0.0003	0.179828
15.3	0.1415	0.144849	0.0433	0.143944	0.4818	0.248149	0.3607	0.104092	0.4667	0.495874	0.3908	0.283081	0.4542	0.34529	0.0546	0.651807	0.0059	0.0328676	0.0478	0.113248	0.0003	0.177073
15.4	0.1364	0.140871	0.0414	0.139899	0.4696	0.243932	0.3505	0.101198	0.4546	0.486771	0.3804	0.278865	0.443	0.339074	0.0523	0.641785	0.0055	0.0319853	0.0458	0.110405	0.0003	0.174382
15.5	0.1314	0.137016	0.0396	0.13595	0.4578	0.23977	0.3407	0.0983754	0.4428	0.477818	0.3702	0.274757	0.4321	0.332965	0.0501	0.631937	0.0052	0.0311029	0.044	0.107746	0.0003	0.171692
15.6	0.1267	0.133283	0.0378	0.132148	0.4462	0.235664	0.3311	0.0956231	0.4313	0.469063	0.3603	0.270649	0.4214	0.326964	0.0479	0.622261	0.0049	0.0302206	0.0422	0.105087	0.0002	0.169065
15.7	0.1221	0.129611	0.0361	0.128395	0.4349	0.231613	0.3217	0.093012	0.4201	0.460408	0.3507	0.266649	0.411	0.32107	0.0459	0.6127	0.0047	0.0293382	0.0405	0.102428	0.0002	0.166438
15.8	0.1176	0.126062	0.0345	0.124788	0.4239	0.227673	0.3127	0.0904009	0.4092	0.451952	0.3414	0.262703	0.4009	0.315283	0.044	0.603312	0.0044	0.0285294	0.0388	0.0999517	0.0002	0.163876
15.9	0.1133	0.122635	0.033	0.121278	0.4131	0.223789	0.3039	0.0879309	0.3985	0.443645	0.3323	0.258811	0.391	0.309603	0.0421	0.594039	0.0041	0.0277206	0.0372	0.0974759	0.0002	0.161377
16	0.1092	0.119269	0.0315	0.117866	0.4027	0.21996	0.2953	0.085461	0.3882	0.435488	0.3234	0.254973	0.3813	0.304031	0.0403	0.584939	0.0039	0.0269118	0.0357	0.0950917	0.0002	0.158943
16.1	0.1052	0.115965	0.0301	0.114551	0.3925	0.216187	0.287	0.0830616	0.3781	0.427479	0.3148	0.251189	0.3719	0.298565	0.0386	0.575954	0.0037	0.0261765	0.0342	0.0927075	0.0002	0.156509
16.2	0.1014	0.112783	0.0288	0.111334	0.3825	0.212469	0.2789	0.0808033	0.3683	0.41962	0.3064	0.247459	0.3627	0.293207	0.0369	0.567142	0.0035	0.0254412	0.0328	0.0904151	0.0002	0.154074
16.3	0.0977	0.109723	0.0275	0.108166	0.3729	0.208862	0.271	0.078545	0.3587	0.41191	0.2982	0.243838	0.3538	0.287956	0.0354	0.558445	0.0033	0.0247059	0.0315	0.0882143	0.0001	0.151704
16.4	0.0942	0.106724	0.0263	0.105143	0.3634	0.205311	0.2634	0.0763574	0.3494	0.404349	0.2903	0.240216	0.345	0.282705	0.0339	0.549863	0.0031	0.0240441	0.0302	0.0860135	0.0001	0.149397
16.5	0.0908	0.103787	0.0251	0.10217	0.3542	0.20176	0.256	0.0742402	0.3403	0.396938	0.2825	0.236649	0.3365	0.277668	0.0324	0.541454	0.0029	0.0233824	0.029	0.0839044	0.0001	0.147091
16.6	0.0875	0.100972	0.024	0.0992939	0.3453	0.198319	0.2488	0.0721937	0.3315	0.389626	0.275	0.233135	0.3282	0.272631	0.031	0.533161	0.0027	0.0227206	0.0278	0.0817954	0.0001	0.144849
16.7	0.0843	0.0981569	0.0229	0.0965154	0.3365	0.194935	0.2418	0.0701471	0.3229	0.382463	0.2677	0.229676	0.3201	0.267701	0.0297	0.524982	0.0026	0.0220588	0.0267	0.079778	0.0001	0.142607
16.8	0.0812	0.0954644	0.0219	0.0937857	0.328	0.191605	0.235	0.0682417	0.3145	0.37545	0.2605	0.22627	0.3122	0.262879	0.0285	0.516919	0.0024	0.0213971	0.0256	0.0778523	0.0001	0.140428
16.9	0.0783	0.0928942	0.0209	0.0911535	0.3197	0.188331	0.2283	0.0663363	0.3063	0.368536	0.2536	0.222919	0.3045	0.258163	0.0272	0.50897	0.0023	0.0208088	0.0245	0.0759266	9.5537e-05	0.13825
17	0.0754	0.090324	0.02	0.08857	0.3116	0.185113	0.2219	0.0645015	0.2984	0.361771	0.2468	0.219622	0.297	0.253555	0.0261	0.501195	0.0022	0.0202206	0.0235	0.074001	8.8951e-05	0.136136
17.1	0.0727	0.0878762	0.0191	0.086084	0.3037	0.18195	0.2157	0.0626667	0.2906	0.355105	0.2402	0.216378	0.2896	0.248947	0.025	0.493477	0.002	0.0197059	0.0226	0.072167	8.2819e-05	0.134086
17.2	0.07	0.0854284	0.0183	0.0836467	0.296	0.178843	0.2096	0.060973	0.2831	0.348589	0.2338	0.213189	0.2825	0.244446	0.0239	0.485932	0.0019	0.0191176	0.0217	0.0704247	7.711e-05	0.132036
17.3	0.0675	0.083103	0.0175	0.081307	0.2885	0.175791	0.2037	0.0592793	0.2757	0.342172	0.2276	0.21	0.2755	0.240052	0.0229	0.478503	0.0018	0.0186029	0.0208	0.0686824	7.1794e-05	0.129986
17.4	0.065	0.0808387	0.0167	0.0790159	0.2812	0.172794	0.1979	0.0575856	0.2686	0.335855	0.2215	0.206919	0.2687	0.235766	0.0219	0.47113	0.0017	0.0180882	0.0199	0.0669402	6.6845e-05	0.128
17.5	0.0627	0.0786357	0.0159	0.0767736	0.2741	0.169853	0.1924	0.056033	0.2616	0.329687	0.2156	0.203838	0.2621	0.231479	0.021	0.463931	0.0016	0.0175735	0.0191	0.0652896	6.2237e-05	0.126014
17.6	0.0604	0.0764327	0.0152	0.0746289	0.2672	0.166912	0.187	0.0544805	0.2548	0.323619	0.2099	0.200811	0.2556	0.2273	0.0201	0.456789	0.0015	0.0170588	0.0183	0.0637307	5.7946e-05	0.124092
17.7	0.0582	0.0743521	0.0146	0.0725328	0.2604	0.164082	0.1817	0.0529279	0.2482	0.3177	0.2043	0.197838	0.2493	0.223227	0.0192	0.449762	0.0014	0.0165441	0.0176	0.0621718	5.3952e-05	0.12217
17.8	0.0561	0.0723326	0.0139	0.0704855	0.2538	0.161252	0.1766	0.0514459	0.2417	0.31183	0.1988	0.194919	0.2431	0.219155	0.0184	0.442909	0.0014	0.0161029	0.0169	0.0606129	5.0232e-05	0.120312
17.9	0.054	0.0703744	0.0133	0.068487	0.2474	0.158533	0.1716	0.0500345	0.2355	0.30611	0.1935	0.192	0.2371	0.21519	0.0176	0.436112	0.0013	0.0156618	0.0162	0.0591458	4.6769e-05	0.118454
18	0.0521	0.0684161	0.0127	0.0665372	0.2411	0.155815	0.1668	0.0486231	0.2293	0.300489	0.1884	0.189189	0.2313	0.211332	0.0169	0.429431	0.0012	0.0152206	0.0155	0.0576786	4.3545e-05	0.116661
18.1	0.0502	0.0665191	0.0121	0.0646848	0.235	0.153151	0.1621	0.0472823	0.2234	0.294968	0.1833	0.186378	0.2256	0.207581	0.0162	0.422808	0.0011	0.0147794	0.0149	0.0562114	4.0543e-05	0.114867
18.2	0.0484	0.0647444	0.0116	0.0628813	0.2291	0.150543	0.1575	0.046012	0.2176	0.289546	0.1785	0.183622	0.22	0.20383	0.0155	0.416357	0.0011	0.0143382	0.0143	0.0548359	3.7748e-05	0.113137
18.3	0.0466	0.0629698	0.0111	0.0610777	0.2233	0.147935	0.1531	0.0446712	0.2119	0.284224	0.1737	0.180919	0.2146	0.200187	0.0148	0.409964	0.001	0.0139706	0.0137	0.0534604	3.5146e-05	0.111343
18.4	0.0449	0.0612563	0.0106	0.0593716	0.2176	0.145438	0.1488	0.0434715	0.2064	0.279001	0.1691	0.178216	0.2093	0.196543	0.0142	0.403686	0.0009	0.0136029	0.0131	0.0521766	3.2723e-05	0.109678
18.5	0.0433	0.0595428	0.0101	0.0577143	0.2121	0.142941	0.1446	0.0422718	0.2011	0.273877	0.1646	0.175568	0.2041	0.193006	0.0136	0.397466	0.0009	0.0131618	0.0126	0.0508929	3.0467e-05	0.108012
18.6	0.0417	0.0578906	0.0097	0.056057	0.2067	0.140499	0.1405	0.0410721	0.1958	0.268853	0.1602	0.172973	0.1991	0.18947	0.013	0.391361	0.0008	0.0127941	0.0121	0.0496091	2.8367e-05	0.106346
18.7	0.0402	0.0563607	0.0092	0.0544971	0.2015	0.138113	0.1365	0.0399429	0.1908	0.263879	0.1559	0.170432	0.1942	0.186148	0.0125	0.385371	0.0008	0.0124265	0.0116	0.048417	2.6412e-05	0.104681
18.8	0.0387	0.0547696	0.0088	0.0529373	0.1964	0.135727	0.1327	0.0388138	0.1858	0.259054	0.1517	0.167892	0.1894	0.182718	0.0119	0.379438	0.0008	0.0121324	0.0111	0.0472249	2.4591e-05	0.103079
18.9	0.0373	0.0533009	0.0084	0.0514749	0.1914	0.133397	0.129	0.0377553	0.181	0.254279	0.1477	0.165405	0.1847	0.179503	0.0114	0.373621	0.0007	0.0117647	0.0107	0.0460328	2.2896e-05	0.101542
19	0.036	0.0518323	0.0081	0.0500125	0.1866	0.131122	0.1253	0.0366967	0.1763	0.249603	0.1438	0.162973	0.1801	0.176181	0.0109	0.367919	0.0007	0.0113971	0.0102	0.0449324	2.1317e-05	0.0999399
19.1	0.0346	0.0504248	0.0077	0.0485989	0.1819	0.128902	0.1218	0.0357087	0.1717	0.245027	0.1399	0.160541	0.1757	0.173073	0.0105	0.362275	0.0006	0.0111029	0.0098	0.043832	1.9848e-05	0.0984024
19.2	0.0334	0.0490173	0.0074	0.0472341	0.1773	0.126683	0.1184	0.0347207	0.1672	0.240501	0.1362	0.158162	0.1713	0.169966	0.01	0.356688	0.0006	0.0108088	0.0094	0.0427317	1.8479e-05	0.0969289
19.3	0.0322	0.047671	0.007	0.045918	0.1728	0.124518	0.115	0.0337327	0.1629	0.236074	0.1326	0.155838	0.1671	0.166858	0.0096	0.351217	0.0006	0.0105147	0.009	0.0416313	1.7206e-05	0.0954555
19.4	0.031	0.0463859	0.0067	0.0446018	0.1684	0.12241	0.1118	0.0328153	0.1587	0.231746	0.129	0.153514	0.163	0.163857	0.0092	0.34586	0.0005	0.0102206	0.0087	0.0406226	1.6019e-05	0.093982
19.5	0.0299	0.0451008	0.0064	0.0433832	0.1641	0.120301	0.1086	0.0318979	0.1545	0.227518	0.1256	0.151243	0.159	0.160964	0.0088	0.340562	0.0005	0.00992647	0.0083	0.0396139	1.4915e-05	0.0925085
19.6	0.0288	0.0438769	0.0061	0.0421158	0.16	0.118248	0.1056	0.0309805	0.1505	0.22334	0.1222	0.148973	0.155	0.157963	0.0084	0.33532	0.0005	0.00963235	0.008	0.0386052	1.3887e-05	0.0910991
19.7	0.0277	0.042653	0.0059	0.0409459	0.1559	0.116195	0.1026	0.0301336	0.1466	0.219211	0.119	0.146811	0.1512	0.155177	0.0081	0.330194	0.0004	0.00933824	0.0076	0.0376882	1.293e-05	0.0896897
19.8	0.0267	0.0414903	0.0056	0.0397761	0.152	0.114253	0.0997	0.0292868	0.1428	0.215182	0.1158	0.144595	0.1475	0.15239	0.0077	0.325126	0.0004	0.00911765	0.0073	0.0367712	1.2038e-05	0.0883443
19.9	0.0258	0.0403888	0.0054	0.0386549	0.1481	0.112255	0.0969	0.0285105	0.1391	0.211203	0.1127	0.142486	0.1438	0.149604	0.0074	0.320115	0.0004	0.00882353	0.007	0.0358542	1.1208e-05	0.086999
20	0.0248	0.0392873	0.0051	0.0375825	0.1444	0.110369	0.0942	0.0276637	0.1355	0.207323	0.1097	0.140378	0.1403	0.146925	0.0071	0.31522	0.0004	0.00860294	0.0067	0.0349373	1.0436e-05	0.0856537
20.1	0.0239	0.0381857	0.0049	0.0365101	0.1407	0.108482	0.0915	0.026958	0.132	0.203543	0.1068	0.13827	0.1368	0.144246	0.0068	0.310382	0.0003	0.00838235	0.0065	0.034112	9.7163e-06	0.0843083
20.2	0.0231	0.0371454	0.0047	0.0354865	0.1372	0.106595	0.0889	0.0261817	0.1285	0.199812	0.1039	0.136216	0.1334	0.141674	0.0065	0.305659	0.0003	0.00808823	0.0062	0.0332867	9.0465e-06	0.083027
20.3	0.0222	0.0361051	0.0045	0.0345116	0.1337	0.10482	0.0864	0.025476	0.1252	0.196131	0.1012	0.134216	0.1301	0.139102	0.0062	0.300936	0.0003	0.00786765	0.006	0.0324614	8.4228e-06	0.0817457
20.4	0.0214	0.035126	0.0043	0.0335367	0.1303	0.102989	0.084	0.0247703	0.1219	0.1925	0.0985	0.132216	0.1269	0.136637	0.0059	0.296328	0.0003	0.00764706	0.0057	0.0316361	7.8422e-06	0.0805285
20.5	0.0206	0.0341469	0.0041	0.0325618	0.127	0.101268	0.0816	0.0240646	0.1188	0.188968	0.0958	0.13027	0.1238	0.134172	0.0057	0.291778	0.0003	0.00742647	0.0055	0.0309025	7.3016e-06	0.0792472
20.6	0.0199	0.0332289	0.0039	0.0316844	0.1238	0.0994927	0.0793	0.0233589	0.1157	0.185486	0.0933	0.128324	0.1207	0.131707	0.0055	0.287286	0.0003	0.00720588	0.0053	0.0300772	6.7982e-06	0.07803
20.7	0.0192	0.032311	0.0037	0.0307582	0.1207	0.097828	0.0771	0.0227237	0.1127	0.182104	0.0908	0.126432	0.1178	0.12935	0.0052	0.282909	0.0002	0.00705882	0.005	0.0293436	6.3296e-06	0.0768769
20.8	0.0185	0.0314543	0.0036	0.0299295	0.1176	0.0961633	0.0749	0.0220886	0.1098	0.178722	0.0884	0.124541	0.1149	0.126992	0.005	0.278589	0.0002	0.00683823	0.0048	0.02861	5.8932e-06	0.0756597
20.9	0.0178	0.0305976	0.0034	0.0290521	0.1146	0.0944986	0.0728	0.021524	0.1069	0.175439	0.086	0.122703	0.112	0.124741	0.0048	0.274269	0.0002	0.00661765	0.0046	0.0279681	5.487e-06	0.0745065
21	0.0171	0.0297408	0.0032	0.0282235	0.1117	0.0928894	0.0708	0.0208889	0.1041	0.172255	0.0837	0.120919	0.1092	0.122491	0.0046	0.270065	0.0002	0.00647059	0.0044	0.0272346	5.1087e-06	0.0733534
21.1	0.0165	0.0289453	0.0031	0.0274435	0.1089	0.0912802	0.0688	0.0203243	0.1014	0.169072	0.0815	0.119081	0.1066	0.120348	0.0044	0.265918	0.0002	0.00625	0.0043	0.0265927	4.7565e-06	0.0722643
21.2	0.0159	0.0281497	0.003	0.0266636	0.1061	0.0897265	0.0668	0.0197598	0.0988	0.165938	0.0793	0.117351	0.1039	0.118097	0.0042	0.261886	0.0002	0.00610294	0.0041	0.0258591	4.4286e-06	0.0711111
21.3	0.0153	0.0273542	0.0028	0.0259324	0.1035	0.0881728	0.065	0.0191952	0.0962	0.162904	0.0772	0.115622	0.1014	0.115954	0.004	0.257855	0.0002	0.00595588	0.0039	0.0253089	4.1233e-06	0.070022
21.4	0.0148	0.0266199	0.0027	0.0252013	0.1008	0.0866746	0.0631	0.0187012	0.0937	0.159919	0.0751	0.113892	0.0989	0.113918	0.0039	0.25388	0.0002	0.00573529	0.0038	0.024667	3.8391e-06	0.068997
21.5	0.0142	0.0258855	0.0026	0.0244701	0.0983	0.0852319	0.0613	0.0181366	0.0913	0.156984	0.0731	0.112216	0.0964	0.111882	0.0037	0.250022	0.0002	0.00558824	0.0036	0.0240251	3.5744e-06	0.0679079
21.6	0.0137	0.0251512	0.0025	0.0237876	0.0958	0.0837337	0.0596	0.0176426	0.0889	0.154099	0.0712	0.110541	0.094	0.109845	0.0035	0.246163	0.0001	0.00544118	0.0035	0.0234749	3.328e-06	0.0668829
21.7	0.0132	0.024478	0.0024	0.0231052	0.0934	0.0823464	0.0579	0.0171486	0.0866	0.151264	0.0693	0.108919	0.0917	0.107809	0.0034	0.242361	0.0001	0.00529412	0.0033	0.022833	3.0986e-06	0.0658579
21.8	0.0127	0.0238049	0.0023	0.0224715	0.091	0.0809037	0.0563	0.0166547	0.0844	0.148479	0.0674	0.107297	0.0894	0.10588	0.0032	0.238675	0.0001	0.00514706	0.0032	0.0222828	2.885e-06	0.0648328
21.9	0.0123	0.0231317	0.0022	0.0218378	0.0887	0.0795164	0.0547	0.0162312	0.0822	0.145743	0.0656	0.105676	0.0872	0.104058	0.0031	0.234989	0.0001	0.005	0.0031	0.0217326	2.6861e-06	0.0638719
22	0.0118	0.0225198	0.0021	0.0212042	0.0865	0.0781847	0.0532	0.0157372	0.08	0.143057	0.0639	0.104108	0.0851	0.102129	0.003	0.231418	0.0001	0.00485294	0.0029	0.0211824	2.5009e-06	0.0628468
22.1	0.0114	0.0219078	0.002	0.0206192	0.0843	0.076853	0.0517	0.0153138	0.078	0.140421	0.0622	0.102595	0.083	0.100308	0.0028	0.227847	0.0001	0.00470588	0.0028	0.0207239	2.3285e-06	0.0618859
22.2	0.011	0.0212959	0.0019	0.0200343	0.0821	0.0755212	0.0502	0.0148904	0.0759	0.137834	0.0605	0.101081	0.0809	0.0984858	0.0027	0.224334	0.0001	0.00455882	0.0027	0.0201737	2.168e-06	0.0609249
22.3	0.0106	0.0207451	0.0018	0.0194981	0.0801	0.0742449	0.0488	0.014467	0.074	0.135297	0.0589	0.0995676	0.0789	0.0966639	0.0026	0.220936	9.5802e-05	0.00448529	0.0026	0.0197153	2.0185e-06	0.060028
22.4	0.0102	0.0201332	0.0017	0.0189131	0.078	0.0729687	0.0474	0.0141141	0.072	0.13281	0.0574	0.0981081	0.077	0.0949493	0.0025	0.217538	9.0329e-05	0.00433824	0.0025	0.0191651	1.8794e-06	0.0590671
22.5	0.0098	0.0195824	0.0016	0.0183769	0.0761	0.0716924	0.0461	0.0136907	0.0702	0.130373	0.0558	0.0966486	0.0751	0.0932346	0.0024	0.214197	8.5169e-05	0.00419118	0.0024	0.0187066	1.7498e-06	0.0581702
22.6	0.0095	0.0190929	0.0016	0.0178895	0.0741	0.0704717	0.0448	0.0133378	0.0684	0.127985	0.0543	0.0951892	0.0732	0.0916271	0.0023	0.210914	8.0304e-05	0.00411765	0.0023	0.0182481	1.6292e-06	0.0572733
22.7	0.0091	0.0185421	0.0015	0.017402	0.0723	0.0693064	0.0435	0.0129144	0.0666	0.125647	0.0529	0.0937838	0.0714	0.0899125	0.0022	0.207689	7.5716e-05	0.00397059	0.0022	0.0177896	1.5169e-06	0.0564404
22.8	0.0088	0.0180526	0.0014	0.0168658	0.0704	0.0680856	0.0423	0.0125616	0.0648	0.123309	0.0515	0.0924324	0.0697	0.088305	0.0021	0.204464	7.1391e-05	0.00382353	0.0021	0.0173311	1.4123e-06	0.0555435
22.9	0.0085	0.017563	0.0014	0.0164271	0.0686	0.0669203	0.0411	0.0122087	0.0632	0.121071	0.0501	0.091027	0.0679	0.0866975	0.002	0.201353	6.7312e-05	0.00375	0.002	0.0169643	1.315e-06	0.0547107
23	0.0082	0.0170734	0.0013	0.0159397	0.0669	0.0658105	0.04	0.0119264	0.0615	0.118833	0.0488	0.0896757	0.0663	0.0851972	0.0019	0.198243	6.3467e-05	0.00367647	0.0019	0.0165058	1.2243e-06	0.0538779
23.1	0.0079	0.0165839	0.0013	0.015501	0.0652	0.0646453	0.0388	0.0115736	0.0599	0.116644	0.0475	0.0883784	0.0646	0.0835897	0.0018	0.195248	5.9841e-05	0.00352941	0.0019	0.016139	1.1399e-06	0.053045
23.2	0.0076	0.0161555	0.0012	0.0150623	0.0636	0.0635355	0.0377	0.0112207	0.0584	0.114505	0.0462	0.0870811	0.063	0.0820893	0.0018	0.192253	5.6423e-05	0.00345588	0.0018	0.0156805	1.0613e-06	0.0522122
23.3	0.0073	0.0157271	0.0011	0.0146236	0.0619	0.0624812	0.0367	0.0109384	0.0569	0.112416	0.045	0.0857838	0.0615	0.080589	0.0017	0.189258	5.32e-05	0.00338235	0.0017	0.0153137	9.8816e-07	0.0514434
23.4	0.007	0.0152376	0.0011	0.0142336	0.0604	0.0614269	0.0356	0.0106562	0.0554	0.110327	0.0438	0.0844865	0.06	0.0791958	0.0016	0.186379	5.0161e-05	0.00323529	0.0016	0.0149469	9.2004e-07	0.0506106
23.5	0.0068	0.0148704	0.001	0.0138436	0.0589	0.0603726	0.0346	0.0103033	0.0539	0.108337	0.0426	0.0832432	0.0585	0.0778027	0.0015	0.183499	4.7295e-05	0.00316176	0.0016	0.0145801	8.5661e-07	0.0498418
23.6	0.0065	0.014442	0.001	0.0134537	0.0574	0.0593183	0.0337	0.010021	0.0525	0.106298	0.0415	0.082	0.057	0.0763024	0.0015	0.180734	4.4593e-05	0.00308823	0.0015	0.0142133	7.9756e-07	0.0490731
23.7	0.0063	0.0140749	0.001	0.0130637	0.0559	0.0583195	0.0327	0.00973874	0.0512	0.104358	0.0404	0.0808108	0.0556	0.0750164	0.0014	0.177912	4.2046e-05	0.00301471	0.0014	0.0138465	7.4258e-07	0.0483684
23.8	0.0061	0.0136465	0.0009	0.0126737	0.0545	0.0573207	0.0318	0.00952703	0.0498	0.102468	0.0393	0.0796216	0.0543	0.0736232	0.0014	0.175205	3.9644e-05	0.00286765	0.0014	0.0134797	6.9139e-07	0.0475996
23.9	0.0059	0.0132793	0.0009	0.0123325	0.0531	0.0563218	0.0309	0.00924475	0.0485	0.100578	0.0382	0.0784324	0.0529	0.0723372	0.0013	0.172498	3.7379e-05	0.00279412	0.0013	0.0132046	6.4373e-07	0.0468949
24	0.0056	0.0129122	0.0008	0.0119913	0.0518	0.0553785	0.03	0.00896246	0.0473	0.0987371	0.0372	0.0772432	0.0516	0.0710512	0.0012	0.169849	3.5244e-05	0.00272059	0.0013	0.0128378	5.9935e-07	0.0461261
24.1	0.0054	0.012545	0.0008	0.0116501	0.0505	0.0544352	0.0292	0.00875075	0.0461	0.0968966	0.0362	0.0761081	0.0503	0.0697652	0.0012	0.167257	3.323e-05	0.00264706	0.0012	0.0125627	5.5803e-07	0.0454214
24.2	0.0052	0.012239	0.0008	0.0113089	0.0492	0.0534919	0.0284	0.00846847	0.0449	0.0951059	0.0353	0.074973	0.0491	0.0684792	0.0011	0.164723	3.1332e-05	0.00257353	0.0012	0.0121959	5.1956e-07	0.0447167
24.3	0.005	0.0118718	0.0007	0.0110164	0.0479	0.052604	0.0276	0.00825676	0.0437	0.093365	0.0343	0.0738919	0.0479	0.0671932	0.0011	0.162189	2.9542e-05	0.0025	0.0011	0.0119208	4.8375e-07	0.0440761
24.4	0.0049	0.0115659	0.0007	0.0106752	0.0467	0.0516607	0.0268	0.00804505	0.0426	0.0916738	0.0334	0.0727568	0.0467	0.0660144	0.001	0.159712	2.7854e-05	0.00242647	0.0011	0.0116458	4.504e-07	0.0433714
24.5	0.0047	0.0112599	0.0007	0.0103827	0.0455	0.0507729	0.026	0.00776276	0.0415	0.0899826	0.0325	0.0717297	0.0455	0.0648356	0.001	0.157235	2.6263e-05	0.00235294	0.001	0.0113707	4.1935e-07	0.0427307
24.6	0.0045	0.0109539	0.0006	0.0100903	0.0444	0.0499405	0.0253	0.00755105	0.0404	0.0883411	0.0316	0.0706486	0.0444	0.0636567	0.001	0.154816	2.4763e-05	0.00227941	0.001	0.0110956	3.9044e-07	0.0420901
24.7	0.0044	0.0106479	0.0006	0.00979778	0.0433	0.0490527	0.0246	0.00733934	0.0393	0.0866996	0.0308	0.0696216	0.0433	0.0624779	0.0009	0.152455	2.3348e-05	0.00227941	0.001	0.0108205	3.6352e-07	0.0414494
24.8	0.0042	0.010342	0.0006	0.00955405	0.0422	0.0482204	0.0239	0.0071982	0.0383	0.0851079	0.03	0.0685405	0.0423	0.0614063	0.0009	0.150094	2.2014e-05	0.00220588	0.0009	0.0105454	3.3846e-07	0.0408088
24.9	0.004	0.010036	0.0006	0.00926158	0.0411	0.047388	0.0232	0.00698649	0.0373	0.0835161	0.0292	0.0675676	0.0412	0.0603346	0.0008	0.14779	2.0757e-05	0.00213235	0.0009	0.0102703	3.1513e-07	0.0401682
25	0.0039	0.00979122	0.0005	0.00901786	0.0401	0.0466112	0.0226	0.00677478	0.0363	0.0820239	0.0284	0.0665405	0.0402	0.0591558	0.0008	0.145544	1.9571e-05	0.00205882	0.0008	0.00999517	2.9341e-07	0.0395275
25.1	0.0038	0.00954644	0.0005	0.00877413	0.039	0.0458343	0.0219	0.00656306	0.0354	0.0804819	0.0276	0.0655676	0.0392	0.0580841	0.0008	0.143297	1.8453e-05	0.00198529	0.0008	0.00981178	2.7318e-07	0.038951
25.2	0.0036	0.00924046	0.0005	0.0085304	0.0381	0.045002	0.0213	0.00642192	0.0345	0.0789897	0.0269	0.0645946	0.0382	0.0571196	0.0007	0.141109	1.7399e-05	0.00191176	0.0008	0.00953668	2.5435e-07	0.0383103
25.3	0.0035	0.00899568	0.0005	0.00828668	0.0371	0.0442806	0.0207	0.00621021	0.0336	0.0775472	0.0262	0.0636216	0.0373	0.0560479	0.0007	0.138978	1.6405e-05	0.00191176	0.0007	0.00926158	2.3681e-07	0.0377337
25.4	0.0034	0.0087509	0.0004	0.00804295	0.0362	0.0435038	0.0201	0.00606907	0.0327	0.0761544	0.0255	0.0627027	0.0364	0.0550834	0.0007	0.136847	1.5468e-05	0.00183823	0.0007	0.00907819	2.2049e-07	0.0371572
25.5	0.0032	0.00850612	0.0004	0.00779923	0.0352	0.0427269	0.0196	0.00585736	0.0319	0.0747119	0.0248	0.0617838	0.0355	0.0540118	0.0006	0.134716	1.4584e-05	0.00176471	0.0007	0.00880309	2.0529e-07	0.0365806
25.6	0.0031	0.00826134	0.0004	0.00760425	0.0343	0.0420055	0.019	0.00571622	0.031	0.0733689	0.0242	0.0608649	0.0346	0.0530473	0.0006	0.132642	1.3751e-05	0.00176471	0.0007	0.00861969	1.9114e-07	0.0360681
25.7	0.003	0.00807775	0.0004	0.00736052	0.0335	0.0412842	0.0185	0.00557507	0.0302	0.0720258	0.0235	0.0599459	0.0337	0.0520828	0.0006	0.130626	1.2965e-05	0.00169118	0.0006	0.00843629	1.7796e-07	0.0354915
25.8	0.0029	0.00783297	0.0004	0.00716554	0.0326	0.0406183	0.018	0.00543393	0.0294	0.0706828	0.0229	0.0590811	0.0329	0.0512255	0.0006	0.128611	1.2225e-05	0.00161765	0.0006	0.0081612	1.6569e-07	0.0349149
25.9	0.0028	0.00764939	0.0004	0.00697056	0.0318	0.0398969	0.0175	0.00522222	0.0287	0.0693895	0.0223	0.0581622	0.0321	0.050261	0.0005	0.126652	1.1526e-05	0.00161765	0.0006	0.0079778	1.5427e-07	0.0344024
26	0.0027	0.00740461	0.0003	0.00677558	0.031	0.0392311	0.017	0.00508108	0.0279	0.0680963	0.0217	0.0572973	0.0313	0.0494036	0.0005	0.124694	1.0868e-05	0.00154412	0.0006	0.0077944	1.4363e-07	0.0338899
26.1	0.0026	0.00722102	0.0003	0.0065806	0.0302	0.0385652	0.0165	0.00493994	0.0272	0.0668527	0.0211	0.0564865	0.0305	0.0484391	0.0005	0.122793	1.0247e-05	0.00147059	0.0005	0.007611	1.3373e-07	0.0333774
26.2	0.0025	0.00703744	0.0003	0.00638562	0.0295	0.0378993	0.016	0.0047988	0.0265	0.0656092	0.0205	0.0556216	0.0298	0.0475818	0.0005	0.120893	9.6617e-06	0.00147059	0.0005	0.00742761	1.2451e-07	0.0328649
26.3	0.0024	0.00679266	0.0003	0.00619064	0.0287	0.0372335	0.0156	0.00472823	0.0258	0.0644154	0.02	0.0548108	0.029	0.0467245	0.0005	0.11905	9.1098e-06	0.00139706	0.0005	0.00724421	1.1593e-07	0.0323524
26.4	0.0023	0.00660907	0.0003	0.0060444	0.028	0.0366231	0.0151	0.00458709	0.0251	0.0632216	0.0195	0.054	0.0283	0.0458671	0.0004	0.117207	8.5893e-06	0.00139706	0.0005	0.00706081	1.0794e-07	0.0318398
26.5	0.0022	0.00642549	0.0003	0.00584942	0.0273	0.0359572	0.0147	0.00444595	0.0245	0.0620775	0.0189	0.0531892	0.0276	0.045117	0.0004	0.115421	8.0987e-06	0.00132353	0.0004	0.00687741	1.005e-07	0.0313273
26.6	0.0022	0.0063031	0.0003	0.00570319	0.0266	0.0353468	0.0143	0.00430481	0.0239	0.0609335	0.0184	0.0524324	0.0269	0.0442597	0.0004	0.113636	7.636e-06	0.00132353	0.0004	0.00669402	9.3569e-08	0.0308789
26.7	0.0021	0.00611951	0.0002	0.00555695	0.0259	0.0347364	0.0139	0.00416366	0.0232	0.0598391	0.0179	0.0516216	0.0263	0.0435095	0.0004	0.111908	7.1998e-06	0.00125	0.0004	0.00651062	8.7119e-08	0.0304304
26.8	0.002	0.00593592	0.0002	0.00536197	0.0253	0.0341815	0.0135	0.00409309	0.0226	0.0586951	0.0175	0.0508649	0.0256	0.0426522	0.0004	0.11018	6.7885e-06	0.00125	0.0004	0.00641892	8.1113e-08	0.0299179
26.9	0.0019	0.00575234	0.0002	0.00521573	0.0246	0.0335711	0.0131	0.00395195	0.022	0.0576505	0.017	0.0501081	0.025	0.041902	0.0004	0.10851	6.4007e-06	0.00117647	0.0004	0.00623552	7.5521e-08	0.0294695
27	0.0019	0.00562995	0.0002	0.0050695	0.024	0.0330162	0.0127	0.00388138	0.0215	0.0565562	0.0165	0.0493514	0.0244	0.0411518	0.0003	0.106839	6.035e-06	0.00117647	0.0004	0.00605212	7.0315e-08	0.029021
27.1	0.0018	0.00544636	0.0002	0.00492326	0.0234	0.0324614	0.0124	0.00374024	0.0209	0.0555614	0.0161	0.0486486	0.0238	0.0404017	0.0003	0.105227	5.6903e-06	0.00110294	0.0004	0.00596043	6.5468e-08	0.0285726
27.2	0.0017	0.00532397	0.0002	0.00482577	0.0228	0.0319065	0.012	0.00366967	0.0204	0.0545168	0.0157	0.0479459	0.0232	0.0396515	0.0003	0.103614	5.3652e-06	0.00110294	0.0003	0.00577703	6.0955e-08	0.0281241
27.3	0.0017	0.00514039	0.0002	0.00467954	0.0222	0.0313516	0.0117	0.00352853	0.0198	0.053522	0.0153	0.0471892	0.0226	0.0390085	0.0003	0.102001	5.0587e-06	0.00110294	0.0003	0.00559363	5.6753e-08	0.0277397
27.4	0.0016	0.005018	0.0002	0.0045333	0.0217	0.0307967	0.0114	0.00345796	0.0193	0.0525271	0.0148	0.0464865	0.0221	0.0382583	0.0003	0.100446	4.7697e-06	0.00102941	0.0003	0.00550193	5.284e-08	0.0272913
27.5	0.0015	0.00489561	0.0002	0.00438707	0.0211	0.0302973	0.011	0.00331682	0.0188	0.051582	0.0145	0.0458378	0.0215	0.0376153	0.0003	0.0988913	4.4972e-06	0.00102941	0.0003	0.00531853	4.9198e-08	0.0268428
27.6	0.0015	0.00477322	0.0002	0.00428958	0.0206	0.0297424	0.0107	0.00324625	0.0183	0.050637	0.0141	0.0451351	0.021	0.0368652	0.0003	0.0973938	4.2403e-06	0.000955882	0.0003	0.00522683	4.5806e-08	0.0264585
27.7	0.0014	0.00465083	0.0002	0.00414334	0.02	0.029243	0.0104	0.00317568	0.0179	0.0496919	0.0137	0.0444865	0.0205	0.0362222	0.0002	0.0958963	3.9981e-06	0.000955882	0.0003	0.00513513	4.2648e-08	0.0260741
27.8	0.0014	0.00446724	0.0001	0.00404585	0.0195	0.0287436	0.0101	0.0031051	0.0174	0.0487965	0.0133	0.0438378	0.02	0.0355792	0.0002	0.0943988	3.7697e-06	0.000955882	0.0003	0.00495174	3.9708e-08	0.0256256
27.9	0.0013	0.00434485	0.0001	0.00394836	0.019	0.0282442	0.0099	0.00296396	0.0169	0.0479012	0.013	0.0431892	0.0195	0.0349362	0.0002	0.092959	3.5543e-06	0.000882353	0.0003	0.00486004	3.6971e-08	0.0252412
28	0.0013	0.00428366	0.0001	0.00380212	0.0186	0.0278002	0.0096	0.00289339	0.0165	0.0470058	0.0126	0.0425405	0.019	0.0342932	0.0002	0.0915191	3.3513e-06	0.000882353	0.0002	0.00476834	3.4422e-08	0.0248569
28.1	0.0012	0.00416127	0.0001	0.00370463	0.0181	0.0273008	0.0093	0.00282282	0.0161	0.0461602	0.0123	0.0418919	0.0185	0.0336502	0.0002	0.0901368	3.1598e-06	0.000882353	0.0002	0.00458494	3.2049e-08	0.0244725
28.2	0.0012	0.00403888	0.0001	0.00360714	0.0176	0.0268569	0.009	0.00275225	0.0157	0.0452649	0.012	0.0412973	0.0181	0.0331144	0.0002	0.0887545	2.9793e-06	0.000808824	0.0002	0.00449324	2.984e-08	0.0240881
28.3	0.0011	0.00391649	0.0001	0.00350965	0.0172	0.0263575	0.0088	0.00268168	0.0153	0.044469	0.0116	0.0406486	0.0176	0.0324714	0.0002	0.0873722	2.8091e-06	0.000808824	0.0002	0.00440154	2.7783e-08	0.0237678
28.4	0.0011	0.0037941	0.0001	0.00341216	0.0168	0.0259136	0.0085	0.00261111	0.0149	0.0436234	0.0113	0.0400541	0.0172	0.0319355	0.0002	0.0860475	2.6487e-06	0.000808824	0.0002	0.00430985	2.5867e-08	0.0233834
28.5	0.0011	0.0037329	0.0001	0.00331467	0.0163	0.0254697	0.0083	0.00254054	0.0145	0.0428275	0.011	0.0394595	0.0168	0.0312925	0.0002	0.0847228	2.4973e-06	0.000735294	0.0002	0.00421815	2.4084e-08	0.022999
28.6	0.001	0.00361051	0.0001	0.00321718	0.0159	0.0250258	0.0081	0.00246997	0.0141	0.0420317	0.0107	0.0388649	0.0163	0.0307567	0.0002	0.0834557	2.3547e-06	0.000735294	0.0002	0.00403475	2.2424e-08	0.0226787
28.7	0.001	0.00348812	9.81e-05	0.00311969	0.0155	0.0246373	0.0078	0.0023994	0.0137	0.0412855	0.0104	0.0383243	0.0159	0.0302209	0.0002	0.082131	2.2202e-06	0.000735294	0.0002	0.00394305	2.0878e-08	0.0222943
28.8	0.001	0.00342693	9.37e-05	0.0030222	0.0151	0.0241934	0.0076	0.00232883	0.0134	0.0405394	0.0102	0.0377297	0.0155	0.029685	0.0002	0.0809215	2.0933e-06	0.000661765	0.0002	0.00385135	1.9439e-08	0.021974
28.9	0.0009	0.00330454	8.95e-05	0.00297346	0.0147	0.023805	0.0074	0.00225826	0.013	0.0397933	0.0099	0.0371892	0.0152	0.0291492	0.0001	0.0796544	1.9737e-06	0.000661765	0.0002	0.00375965	1.8099e-08	0.0216537
29	0.0009	0.00324334	8.56e-05	0.00287596	0.0144	0.0233611	0.0072	0.00218769	0.0127	0.0390472	0.0096	0.0366486	0.0148	0.0286134	0.0001	0.0784449	1.861e-06	0.000661765	0.0002	0.00366795	1.6851e-08	0.0213333
29.1	0.0009	0.00312095	8.18e-05	0.00277847	0.014	0.0229727	0.007	0.00211712	0.0124	0.038301	0.0094	0.0361081	0.0144	0.0280776	0.0001	0.0772354	1.7547e-06	0.000661765	0.0002	0.00357625	1.5689e-08	0.021013
29.2	0.0008	0.00305975	7.81e-05	0.00272973	0.0136	0.0225842	0.0068	0.00204655	0.012	0.0376047	0.0091	0.0355676	0.0141	0.0275417	0.0001	0.0760259	1.6544e-06	0.000588235	0.0001	0.00348456	1.4608e-08	0.0206286
29.3	0.0008	0.00293736	7.47e-05	0.00263224	0.0133	0.0221958	0.0066	0.00204655	0.0117	0.0369083	0.0089	0.035027	0.0137	0.0271131	0.0001	0.074874	1.5599e-06	0.000588235	0.0001	0.00339286	1.3601e-08	0.0203724
29.4	0.0008	0.00287617	7.13e-05	0.00258349	0.013	0.0218074	0.0064	0.00197598	0.0114	0.0362616	0.0086	0.0344865	0.0134	0.0265772	0.0001	0.0737221	1.4708e-06	0.000588235	0.0001	0.00330116	1.2663e-08	0.0200521
29.5	0.0007	0.00281497	6.82e-05	0.002486	0.0126	0.0214744	0.0062	0.0019054	0.0111	0.0355652	0.0084	0.034	0.013	0.0261486	0.0001	0.0726278	1.3868e-06	0.000588235	0.0001	0.00320946	1.179e-08	0.0197317
29.6	0.0007	0.00275378	6.51e-05	0.00243726	0.0123	0.021086	0.0061	0.00183483	0.0108	0.0349186	0.0082	0.0335135	0.0127	0.0256127	0.0001	0.0714759	1.3076e-06	0.000588235	0.0001	0.00320946	1.0977e-08	0.0194114
29.7	0.0007	0.00263139	6.22e-05	0.00233977	0.012	0.0206976	0.0059	0.00183483	0.0106	0.034272	0.008	0.032973	0.0124	0.0251841	0.0001	0.0703816	1.2329e-06	0.000514706	0.0001	0.00311776	1.0221e-08	0.0191552
29.8	0.0007	0.00257019	5.95e-05	0.00229102	0.0117	0.0203646	0.0057	0.00176426	0.0103	0.0336751	0.0078	0.0324865	0.0121	0.0247554	9.9875e-05	0.0692873	1.1624e-06	0.000514706	0.0001	0.00302606	9.5161e-09	0.0188348
29.9	0.0006	0.002509	5.68e-05	0.00224228	0.0114	0.0200317	0.0056	0.00169369	0.01	0.0330284	0.0076	0.032	0.0118	0.0243267	9.5625e-05	0.0682505	1.096e-06	0.000514706	0.0001	0.00293436	8.8601e-09	0.0185145
30	0.0006	0.0024478	5.43e-05	0.00214479	0.0111	0.0196988	0.0054	0.00162312	0.0098	0.0324315	0.0074	0.0315676	0.0115	0.0238981	9.1557e-05	0.0672138	1.0334e-06	0.000514706	0.0001	0.00284266	8.2493e-09	0.0182583
30.1	0.0006	0.00238661	5.19e-05	0.00209604	0.0108	0.0193658	0.0053	0.00162312	0.0095	0.0318346	0.0072	0.0310811	0.0112	0.0234694	8.7661e-05	0.0661771	9.7439e-07	0.000514706	0.0001	0.00284266	7.6806e-09	0.018002
30.2	0.0006	0.00232541	4.96e-05	0.0020473	0.0106	0.0190329	0.0051	0.00155255	0.0093	0.0312377	0.007	0.0306486	0.011	0.0230407	8.3932e-05	0.0651404	9.1872e-07	0.000441176	9.6189e-05	0.00275097	7.1511e-09	0.0176817
30.3	0.0005	0.00226422	4.74e-05	0.00199855	0.0103	0.0187	0.005	0.00155255	0.009	0.0306906	0.0068	0.0301622	0.0107	0.0226121	8.0361e-05	0.0641613	8.6624e-07	0.000441176	9.2264e-05	0.00265927	6.6582e-09	0.0174254
30.4	0.0005	0.00220302	4.53e-05	0.00194981	0.01	0.018367	0.0048	0.00148198	0.0088	0.0300937	0.0066	0.0297297	0.0104	0.0221834	7.6942e-05	0.0631821	8.1675e-07	0.000441176	8.8498e-05	0.00256757	6.1992e-09	0.0171692
30.5	0.0005	0.00214183	4.33e-05	0.00185232	0.0098	0.0180341	0.0047	0.00141141	0.0085	0.0295465	0.0064	0.0292973	0.0102	0.0217547	7.3668e-05	0.062203	7.7009e-07	0.000441176	8.4887e-05	0.00256757	5.7718e-09	0.0169129
30.6	0.0005	0.00208063	4.13e-05	0.00180357	0.0095	0.0177566	0.0046	0.00141141	0.0083	0.0289994	0.0063	0.0288649	0.0099	0.0214332	7.0534e-05	0.0612239	7.261e-07	0.000441176	8.1422e-05	0.00247587	5.3739e-09	0.0166567
30.7	0.0005	0.00201944	3.95e-05	0.00175483	0.0093	0.0174237	0.0044	0.00134084	0.0081	0.0285019	0.0061	0.0284324	0.0097	0.0210046	6.7533e-05	0.0603024	6.8462e-07	0.000367647	7.8099e-05	0.00238417	5.0035e-09	0.0164004
30.8	0.0005	0.00195824	3.78e-05	0.00170608	0.0091	0.0171463	0.0043	0.00134084	0.0079	0.0279548	0.0059	0.028	0.0094	0.0205759	6.4659e-05	0.0593808	6.4551e-07	0.000367647	7.4912e-05	0.00238417	4.6585e-09	0.0161441
30.9	0.0004	0.00189705	3.61e-05	0.00165734	0.0088	0.0168688	0.0042	0.00127027	0.0077	0.0274574	0.0058	0.0275676	0.0092	0.0202544	6.1908e-05	0.0584593	6.0864e-07	0.000367647	7.1855e-05	0.00229247	4.3374e-09	0.0158879
31	0.0004	0.00183585	3.45e-05	0.00160859	0.0086	0.0165359	0.0041	0.00127027	0.0075	0.0269599	0.0056	0.0271892	0.009	0.0199329	5.9274e-05	0.0575954	5.7387e-07	0.000367647	6.8923e-05	0.00220077	4.0384e-09	0.0156316
31.1	0.0004	0.00177466	3.29e-05	0.00155985	0.0084	0.0162584	0.004	0.0011997	0.0073	0.0264625	0.0055	0.0267568	0.0087	0.0195043	5.6752e-05	0.0566739	5.4108e-07	0.000367647	6.611e-05	0.00220077	3.76e-09	0.0153754
31.2	0.0004	0.00177466	3.15e-05	0.0015111	0.0082	0.015981	0.0038	0.0011997	0.0071	0.0259651	0.0053	0.0263784	0.0085	0.0191828	5.4338e-05	0.0558099	5.1017e-07	0.000367647	6.3412e-05	0.00210907	3.5008e-09	0.0151832
31.3	0.0004	0.00171346	3.01e-05	0.0015111	0.008	0.0157035	0.0037	0.00112913	0.0069	0.0254677	0.0052	0.026	0.0083	0.0188613	5.2026e-05	0.054946	4.8103e-07	0.000367647	6.0824e-05	0.00210907	3.2594e-09	0.0149269
31.4	0.0004	0.00165227	2.87e-05	0.00146236	0.0078	0.0154816	0.0036	0.00112913	0.0067	0.02502	0.005	0.0256216	0.0081	0.0185398	4.9812e-05	0.0541397	4.5355e-07	0.000294118	5.8342e-05	0.00201738	3.0348e-09	0.0147347
31.5	0.0004	0.00159107	2.75e-05	0.00141361	0.0076	0.0152041	0.0035	0.00105856	0.0066	0.0245724	0.0049	0.0252432	0.0079	0.0181111	4.7693e-05	0.0532757	4.2764e-07	0.000294118	5.5961e-05	0.00201738	2.8255e-09	0.0144785
31.6	0.0003	0.00159107	2.62e-05	0.00136487	0.0074	0.0149267	0.0034	0.00105856	0.0064	0.0241247	0.0048	0.0248649	0.0077	0.0177896	4.5664e-05	0.0524694	4.0321e-07	0.000294118	5.3677e-05	0.00192568	2.6308e-09	0.0142863
31.7	0.0003	0.00152988	2.51e-05	0.00131612	0.0072	0.0147047	0.0033	0.00105856	0.0062	0.023677	0.0046	0.0244865	0.0075	0.0174681	4.3721e-05	0.0516631	3.8017e-07	0.000294118	5.1486e-05	0.00183398	2.4494e-09	0.01403
31.8	0.0003	0.00146868	2.4e-05	0.00126738	0.007	0.0144273	0.0032	0.000987988	0.0061	0.0232293	0.0045	0.0241081	0.0073	0.0171466	4.1861e-05	0.0508567	3.5846e-07	0.000294118	4.9385e-05	0.00183398	2.2805e-09	0.0138378
31.9	0.0003	0.00146868	2.29e-05	0.00126738	0.0068	0.0142053	0.0031	0.000987988	0.0059	0.0227817	0.0044	0.0237838	0.0072	0.0169323	4.008e-05	0.050108	3.3798e-07	0.000294118	4.737e-05	0.00174228	2.1233e-09	0.0135816
32	0.0003	0.00140749	2.19e-05	0.00121863	0.0067	0.0139279	0.0031	0.000917417	0.0058	0.0223837	0.0043	0.0234054	0.007	0.0166108	3.8375e-05	0.0493593	3.1867e-07	0.000294118	4.5437e-05	0.00174228	1.977e-09	0.0133894
32.1	0.0003	0.00134629	2.09e-05	0.00116988	0.0065	0.0137059	0.003	0.000917417	0.0056	0.0219858	0.0042	0.0230811	0.0068	0.0162893	3.6742e-05	0.0485529	3.0047e-07	0.000294118	4.3582e-05	0.00174228	1.8407e-09	0.0131972
32.2	0.0003	0.00134629	2e-05	0.00116988	0.0063	0.0134839	0.0029	0.000917417	0.0055	0.0215381	0.0041	0.0227027	0.0066	0.0159678	3.5179e-05	0.0478042	2.833e-07	0.000294118	4.1804e-05	0.00165058	1.7138e-09	0.013005
32.3	0.0003	0.0012851	1.91e-05	0.00112114	0.0062	0.013262	0.0028	0.000846847	0.0053	0.0211899	0.0039	0.0223784	0.0065	0.0156463	3.3682e-05	0.047113	2.6712e-07	0.000220588	4.0098e-05	0.00165058	1.5956e-09	0.0128128
32.4	0.0003	0.0012239	1.82e-05	0.00107239	0.006	0.0129845	0.0027	0.000846847	0.0052	0.020792	0.0038	0.0220541	0.0063	0.0154319	3.2249e-05	0.0463643	2.5186e-07	0.000220588	3.8461e-05	0.00155888	1.4856e-09	0.0126206
32.5	0.0002	0.0012239	1.74e-05	0.00107239	0.0059	0.0127626	0.0026	0.000846847	0.0051	0.0203941	0.0037	0.0217297	0.0062	0.0151104	3.0877e-05	0.0456731	2.3747e-07	0.000220588	3.6892e-05	0.00155888	1.3832e-09	0.0124284
32.6	0.0002	0.00116271	1.67e-05	0.00102365	0.0057	0.0125961	0.0026	0.000776276	0.0049	0.0199961	0.0036	0.0214054	0.006	0.0148961	2.9563e-05	0.044982	2.239e-07	0.000220588	3.5386e-05	0.00146718	1.2879e-09	0.0122362
32.7	0.0002	0.00116271	1.59e-05	0.000974903	0.0056	0.0123742	0.0025	0.000776276	0.0048	0.0196479	0.0035	0.0210811	0.0059	0.0145746	2.8305e-05	0.0442909	2.1111e-07	0.000220588	3.3942e-05	0.00146718	1.1991e-09	0.012044
32.8	0.0002	0.00110151	1.52e-05	0.000974903	0.0054	0.0121522	0.0024	0.000776276	0.0047	0.0192997	0.0035	0.0207568	0.0057	0.0143603	2.7101e-05	0.0435997	1.9905e-07	0.000220588	3.2557e-05	0.00146718	1.1164e-09	0.0118519
32.9	0.0002	0.00110151	1.45e-05	0.000926158	0.0053	0.0119302	0.0024	0.000705706	0.0045	0.0189516	0.0034	0.0204865	0.0056	0.0140388	2.5948e-05	0.0429086	1.8768e-07	0.000220588	3.1228e-05	0.00137548	1.0395e-09	0.0116597
33	0.0002	0.00104032	1.39e-05	0.000926158	0.0052	0.0117083	0.0023	0.000705706	0.0044	0.0186034	0.0033	0.0201622	0.0054	0.0138244	2.4844e-05	0.042275	1.7696e-07	0.000220588	2.9954e-05	0.00137548	9.678e-10	0.0114675
33.1	0.0002	0.00104032	1.33e-05	0.000877413	0.005	0.0115418	0.0022	0.000705706	0.0043	0.0182552	0.0032	0.0198919	0.0053	0.0136101	2.3787e-05	0.0416415	1.6685e-07	0.000220588	2.8731e-05	0.00128378	9.0108e-10	0.0112753
33.2	0.0002	0.000979122	1.27e-05	0.000877413	0.0049	0.0113199	0.0022	0.000705706	0.0042	0.017907	0.0031	0.0195676	0.0052	0.0132886	2.2775e-05	0.0410079	1.5732e-07	0.000220588	2.7559e-05	0.00128378	8.3897e-10	0.0111471
33.3	0.0002	0.000979122	1.21e-05	0.000828668	0.0048	0.0111534	0.0021	0.000635135	0.0041	0.0175588	0.003	0.0192973	0.005	0.0130743	2.1806e-05	0.0403744	1.4833e-07	0.000220588	2.6434e-05	0.00128378	7.8113e-10	0.010955
33.4	0.0002	0.000979122	1.16e-05	0.000828668	0.0046	0.0109314	0.002	0.000635135	0.004	0.0172603	0.0029	0.018973	0.0049	0.0128599	2.0878e-05	0.0397408	1.3986e-07	0.000220588	2.5355e-05	0.00119209	7.2728e-10	0.0107628
33.5	0.0002	0.000917927	1.11e-05	0.000779923	0.0045	0.010765	0.002	0.000635135	0.0039	0.0169619	0.0029	0.0187027	0.0048	0.0126456	1.999e-05	0.0391073	1.3187e-07	0.000147059	2.432e-05	0.00119209	6.7714e-10	0.0106346
33.6	0.0002	0.000917927	1.06e-05	0.000779923	0.0044	0.0105985	0.0019	0.000635135	0.0038	0.0166137	0.0028	0.0184324	0.0047	0.0124313	1.9139e-05	0.0385313	1.2434e-07	0.000147059	2.3328e-05	0.00119209	6.3046e-10	0.0104424
33.7	0.0002	0.000856731	1.01e-05	0.000731178	0.0043	0.0103765	0.0019	0.000564565	0.0037	0.0163152	0.0027	0.0181622	0.0046	0.012217	1.8325e-05	0.0379554	1.1723e-07	0.000147059	2.2376e-05	0.00110039	5.87e-10	0.0103143
33.8	0.0001	0.000856731	9.65e-06	0.000731178	0.0042	0.0102101	0.0018	0.000564565	0.0036	0.0160168	0.0026	0.0178919	0.0045	0.0120026	1.7545e-05	0.0373794	1.1054e-07	0.000147059	2.1463e-05	0.00110039	5.4654e-10	0.0101221
33.9	0.0001	0.000856731	9.23e-06	0.000731178	0.0041	0.0100436	0.0018	0.000564565	0.0035	0.0157183	0.0026	0.0176216	0.0043	0.0117883	1.6799e-05	0.0368035	1.0422e-07	0.000147059	2.0587e-05	0.00110039	5.0886e-10	0.00999399
34	0.0001	0.000795536	8.82e-06	0.000682432	0.004	0.00987713	0.0017	0.000564565	0.0034	0.0154199	0.0025	0.0173514	0.0042	0.011574	1.6084e-05	0.0362275	9.8267e-08	0.000147059	1.9747e-05	0.00110039	4.7378e-10	0.00986587
34.1	0.0001	0.000795536	8.42e-06	0.000682432	0.0039	0.00971066	0.0017	0.000493994	0.0033	0.0151712	0.0024	0.0171351	0.0041	0.0113596	1.54e-05	0.0356515	9.2653e-08	0.000147059	1.8941e-05	0.00100869	4.4112e-10	0.00967367
34.2	0.0001	0.000734341	8.05e-06	0.000633687	0.0038	0.00954419	0.0016	0.000493994	0.0032	0.0148727	0.0024	0.0168649	0.004	0.0111453	1.4745e-05	0.0351332	8.736e-08	0.000147059	1.8168e-05	0.00100869	4.1071e-10	0.00954555
34.3	0.0001	0.000734341	7.69e-06	0.000633687	0.0037	0.00937772	0.0016	0.000493994	0.0031	0.014624	0.0023	0.0165946	0.0039	0.010931	1.4117e-05	0.0345572	8.237e-08	0.000147059	1.7426e-05	0.00100869	3.824e-10	0.00941742
34.4	0.0001	0.000734341	7.35e-06	0.000633687	0.0036	0.00921126	0.0015	0.000493994	0.0031	0.0143256	0.0022	0.0163784	0.0038	0.0107166	1.3517e-05	0.0340389	7.7664e-08	0.000147059	1.6715e-05	0.000916988	3.5603e-10	0.00922523
34.5	0.0001	0.000673146	7.02e-06	0.000584942	0.0035	0.00904479	0.0015	0.000493994	0.003	0.0140769	0.0022	0.0161081	0.0037	0.0105023	1.2941e-05	0.0335205	7.3228e-08	0.000147059	1.6033e-05	0.000916988	3.3149e-10	0.0090971
34.6	0.0001	0.000673146	6.71e-06	0.000584942	0.0034	0.00887832	0.0015	0.000423423	0.0029	0.0138282	0.0021	0.0158919	0.0036	0.010288	1.2391e-05	0.0330022	6.9044e-08	0.000147059	1.5379e-05	0.000916988	3.0864e-10	0.00896897
34.7	0.0001	0.000673146	6.41e-06	0.000584942	0.0033	0.00876734	0.0014	0.000423423	0.0028	0.0135795	0.0021	0.0156216	0.0036	0.0101808	1.1864e-05	0.0324838	6.51e-08	0.000147059	1.4751e-05	0.000916988	2.8736e-10	0.00884084
34.8	0.0001	0.000673146	6.13e-06	0.000536197	0.0032	0.00860087	0.0014	0.000423423	0.0028	0.0133307	0.002	0.0154054	0.0035	0.00996646	1.1359e-05	0.032023	6.1381e-08	0.000147059	1.4149e-05	0.00082529	2.6755e-10	0.00871271
34.9	9.96e-05	0.000611951	5.86e-06	0.000536197	0.0032	0.0084344	0.0013	0.000423423	0.0027	0.013082	0.002	0.0151892	0.0034	0.00975213	1.0876e-05	0.0315047	5.7875e-08	0.000147059	1.3572e-05	0.00082529	2.4911e-10	0.00858459
35	9.6e-05	0.000611951	5.6e-06	0.000536197	0.0031	0.00832342	0.0013	0.000423423	0.0026	0.0128333	0.0019	0.014973	0.0033	0.00964496	1.0413e-05	0.0310439	5.4568e-08	0.000147059	1.3018e-05	0.00082529	2.3193e-10	0.00845646
35.1	9.25e-05	0.000611951	5.35e-06	0.000487452	0.003	0.00815696	0.0013	0.000423423	0.0025	0.0125846	0.0019	0.0147568	0.0032	0.00943063	9.9699e-06	0.0305256	5.1451e-08	0.000147059	1.2487e-05	0.00082529	2.1595e-10	0.00832833
35.2	8.91e-05	0.000550756	5.11e-06	0.000487452	0.0029	0.00804598	0.0012	0.000352853	0.0025	0.0123359	0.0018	0.0145405	0.0031	0.0092163	9.5457e-06	0.0300648	4.8512e-08	0.000147059	1.1977e-05	0.00082529	2.0106e-10	0.0082002
35.3	8.59e-05	0.000550756	4.88e-06	0.000487452	0.0029	0.00787951	0.0012	0.000352853	0.0024	0.012137	0.0018	0.0143243	0.0031	0.00910913	9.1396e-06	0.029604	4.574e-08	7.35294e-05	1.1488e-05	0.000733591	1.872e-10	0.00807207
35.4	8.28e-05	0.000550756	4.67e-06	0.000438707	0.0028	0.00776853	0.0012	0.000352853	0.0024	0.0118882	0.0017	0.0141081	0.003	0.0088948	8.7507e-06	0.0291433	4.3127e-08	7.35294e-05	1.1019e-05	0.000733591	1.7429e-10	0.00794394
35.5	7.98e-05	0.000550756	4.46e-06	0.000438707	0.0027	0.00760206	0.0011	0.000352853	0.0023	0.0116893	0.0017	0.0138919	0.0029	0.00878763	8.3784e-06	0.0287401	4.0664e-08	7.35294e-05	1.057e-05	0.000733591	1.6228e-10	0.00781582
35.6	7.69e-05	0.000489561	4.26e-06	0.000438707	0.0026	0.00749108	0.0011	0.000352853	0.0022	0.0114903	0.0016	0.0136757	0.0028	0.0085733	8.0219e-06	0.0282793	3.8341e-08	7.35294e-05	1.0138e-05	0.000733591	1.5109e-10	0.00768769
35.7	7.41e-05	0.000489561	4.07e-06	0.000438707	0.0026	0.0073801	0.0011	0.000352853	0.0022	0.0112416	0.0016	0.0134595	0.0028	0.00846613	7.6806e-06	0.0278186	3.615e-08	7.35294e-05	9.7245e-06	0.000733591	1.4068e-10	0.00755956
35.8	7.14e-05	0.000489561	3.89e-06	0.000389961	0.0025	0.00721364	0.001	0.000352853	0.0021	0.0110426	0.0015	0.0132973	0.0027	0.00835897	7.3538e-06	0.0274154	3.4085e-08	7.35294e-05	9.3277e-06	0.000641892	1.3098e-10	0.00743143
35.9	6.88e-05	0.000489561	3.72e-06	0.000389961	0.0024	0.00710266	0.001	0.000282282	0.0021	0.0108437	0.0015	0.0130811	0.0026	0.00814463	7.0409e-06	0.0270122	3.2138e-08	7.35294e-05	8.947e-06	0.000641892	1.2195e-10	0.0073033
36	6.63e-05	0.000489561	3.55e-06	0.000389961	0.0024	0.00699168	0.001	0.000282282	0.002	0.0106447	0.0015	0.0128649	0.0026	0.00803747	6.7414e-06	0.0266091	3.0302e-08	7.35294e-05	8.5819e-06	0.000641892	1.1354e-10	0.00723924
36.1	6.39e-05	0.000428366	3.39e-06	0.000389961	0.0023	0.0068807	0.0009	0.000282282	0.002	0.0104457	0.0014	0.0127027	0.0025	0.00782314	6.4546e-06	0.0261483	2.8571e-08	7.35294e-05	8.2316e-06	0.000641892	1.0571e-10	0.00711111
36.2	6.15e-05	0.000428366	3.24e-06	0.000389961	0.0023	0.00676972	0.0009	0.000282282	0.0019	0.0102468	0.0014	0.0124865	0.0024	0.00771597	6.1799e-06	0.0258027	2.6939e-08	7.35294e-05	7.8957e-06	0.000641892	9.8427e-11	0.00698298
36.3	5.93e-05	0.000428366	3.1e-06	0.000341216	0.0022	0.00665874	0.0009	0.000282282	0.0019	0.0100975	0.0013	0.0123243	0.0024	0.0076088	5.917e-06	0.0253996	2.54e-08	7.35294e-05	7.5735e-06	0.000550193	9.1642e-11	0.00691892
36.4	5.71e-05	0.000428366	2.96e-06	0.000341216	0.0022	0.00654776	0.0009	0.000282282	0.0018	0.00989858	0.0013	0.0121622	0.0023	0.00750164	5.6653e-06	0.0249964	2.3949e-08	7.35294e-05	7.2644e-06	0.000550193	8.5324e-11	0.00679079
36.5	5.51e-05	0.000428366	2.83e-06	0.000341216	0.0021	0.00643678	0.0008	0.000282282	0.0018	0.00969961	0.0013	0.0119459	0.0023	0.0072873	5.4242e-06	0.0245932	2.2581e-08	7.35294e-05	6.9679e-06	0.000550193	7.9442e-11	0.00666266
36.6	5.31e-05	0.000367171	2.7e-06	0.000341216	0.002	0.0063258	0.0008	0.000282282	0.0017	0.00955039	0.0012	0.0117838	0.0022	0.00718014	5.1934e-06	0.0242477	2.1291e-08	7.35294e-05	6.6836e-06	0.000550193	7.3966e-11	0.0065986
36.7	5.11e-05	0.000367171	2.58e-06	0.000341216	0.002	0.00621482	0.0008	0.000282282	0.0017	0.00935142	0.0012	0.0116216	0.0022	0.00707297	4.9725e-06	0.0238445	2.0075e-08	7.27397e-05	6.4108e-06	0.000550193	6.8867e-11	0.00647047
36.8	4.93e-05	0.000367171	2.47e-06	0.000292471	0.0019	0.00610385	0.0008	0.000211712	0.0016	0.0092022	0.0012	0.0114595	0.0021	0.00696581	4.7609e-06	0.0234989	1.8928e-08	7.06912e-05	6.1492e-06	0.000550193	6.4119e-11	0.00640641
36.9	4.75e-05	0.000367171	2.36e-06	0.000292471	0.0019	0.00599287	0.0008	0.000211712	0.0016	0.00900323	0.0011	0.0112432	0.0021	0.00675147	4.5583e-06	0.0231533	1.7846e-08	6.87e-05	5.8982e-06	0.000550193	5.9699e-11	0.00627828
37	4.58e-05	0.000367171	2.25e-06	0.000292471	0.0018	0.00588189	0.0007	0.000211712	0.0015	0.008854	0.0011	0.0110811	0.002	0.00664431	4.3644e-06	0.0227502	1.6827e-08	6.67647e-05	5.6575e-06	0.000458494	5.5583e-11	0.00621421
37.1	4.41e-05	0.000367171	2.15e-06	0.000292471	0.0018	0.00577091	0.0007	0.000211712	0.0015	0.00870478	0.0011	0.0109189	0.002	0.00653714	4.1787e-06	0.0224046	1.5866e-08	6.48838e-05	5.4266e-06	0.000458494	5.1752e-11	0.00608609
37.2	4.25e-05	0.000305976	2.06e-06	0.000292471	0.0018	0.00565993	0.0007	0.000211712	0.0015	0.00850581	0.0011	0.0107568	0.0019	0.00642997	4.0009e-06	0.022059	1.4959e-08	6.30566e-05	5.2052e-06	0.000458494	4.8184e-11	0.00602202
37.3	4.09e-05	0.000305976	1.97e-06	0.000292471	0.0017	0.00560444	0.0007	0.000211712	0.0014	0.00835659	0.001	0.0105946	0.0019	0.00632281	3.8307e-06	0.0217711	1.4105e-08	6.12801e-05	4.9927e-06	0.000458494	4.4862e-11	0.00589389
37.4	3.95e-05	0.000305976	1.88e-06	0.000243726	0.0017	0.00549346	0.0007	0.000211712	0.0014	0.00820736	0.001	0.0104324	0.0018	0.00621564	3.6677e-06	0.0214255	1.3299e-08	5.95544e-05	4.789e-06	0.000458494	4.177e-11	0.00582983
37.5	3.8e-05	0.000305976	1.8e-06	0.000243726	0.0016	0.00538248	0.0006	0.000211712	0.0014	0.00805814	0.001	0.0103243	0.0018	0.00610848	3.5117e-06	0.0210799	1.2539e-08	5.78765e-05	4.5935e-06	0.000458494	3.889e-11	0.0057017
37.6	3.66e-05	0.000305976	1.72e-06	0.000243726	0.0016	0.00532699	0.0006	0.000211712	0.0013	0.00790892	0.0009	0.0101622	0.0017	0.00600131	3.3623e-06	0.0207343	1.1823e-08	5.62463e-05	4.4061e-06	0.000458494	3.6209e-11	0.00563764
37.7	3.53e-05	0.000305976	1.64e-06	0.000243726	0.0015	0.00521601	0.0006	0.000211712	0.0013	0.00775969	0.0009	0.01	0.0017	0.00589414	3.2192e-06	0.0204464	1.1148e-08	5.46625e-05	4.2263e-06	0.000458494	3.3713e-11	0.00557357
37.8	3.4e-05	0.000305976	1.57e-06	0.000243726	0.0015	0.00510503	0.0006	0.000211712	0.0013	0.00761047	0.0009	0.00983784	0.0016	0.00578698	3.0822e-06	0.0201008	1.0511e-08	5.31228e-05	4.0538e-06	0.000366795	3.1389e-11	0.00544545
37.9	3.28e-05	0.00024478	1.5e-06	0.000243726	0.0015	0.00504954	0.0006	0.000211712	0.0012	0.00751098	0.0009	0.00972973	0.0016	0.00567981	2.9511e-06	0.0198128	9.9103e-09	5.16265e-05	3.8883e-06	0.000366795	2.9225e-11	0.00538138
38	3.16e-05	0.00024478	1.43e-06	0.000243726	0.0014	0.00493856	0.0006	0.000141141	0.0012	0.00736176	0.0008	0.00956757	0.0016	0.00557264	2.8255e-06	0.0195248	9.3441e-09	5.01721e-05	3.7297e-06	0.000366795	2.721e-11	0.00531732
38.1	3.04e-05	0.00024478	1.37e-06	0.000194981	0.0014	0.00488308	0.0005	0.000141141	0.0012	0.00721253	0.0008	0.00940541	0.0015	0.00546548	2.7053e-06	0.0192369	8.8103e-09	4.87588e-05	3.5774e-06	0.000366795	2.5335e-11	0.00518919
38.2	2.93e-05	0.00024478	1.31e-06	0.000194981	0.0014	0.0047721	0.0005	0.000141141	0.0011	0.00706331	0.0008	0.0092973	0.0015	0.00535831	2.5902e-06	0.0189489	8.307e-09	4.73853e-05	3.4315e-06	0.000366795	2.3588e-11	0.00512513
38.3	2.83e-05	0.00024478	1.25e-06	0.000194981	0.0013	0.00471661	0.0005	0.000141141	0.0011	0.00696382	0.0008	0.00913514	0.0014	0.00525114	2.48e-06	0.0186033	7.8325e-09	4.60507e-05	3.2914e-06	0.000366795	2.1962e-11	0.00506106
38.4	2.72e-05	0.00024478	1.19e-06	0.000194981	0.0013	0.00460563	0.0005	0.000141141	0.0011	0.0068146	0.0008	0.00902703	0.0014	0.00514398	2.3745e-06	0.0183729	7.385e-09	4.47537e-05	3.1571e-06	0.000366795	2.0448e-11	0.004997
38.5	2.63e-05	0.00024478	1.14e-06	0.000194981	0.0013	0.00455014	0.0005	0.000141141	0.001	0.00671512	0.0007	0.00886486	0.0014	0.00503681	2.2735e-06	0.018085	6.9631e-09	4.34934e-05	3.0282e-06	0.000366795	1.9038e-11	0.00493293
38.6	2.53e-05	0.00024478	1.09e-06	0.000194981	0.0012	0.00449465	0.0005	0.000141141	0.001	0.00656589	0.0007	0.00875676	0.0013	0.00503681	2.1767e-06	0.017797	6.5654e-09	4.22676e-05	2.9047e-06	0.000366795	1.7726e-11	0.0048048
38.7	2.44e-05	0.00024478	1.04e-06	0.000194981	0.0012	0.00438367	0.0005	0.000141141	0.001	0.00646641	0.0007	0.0085946	0.0013	0.00492965	2.0841e-06	0.017509	6.1903e-09	4.10772e-05	2.7861e-06	0.000366795	1.6504e-11	0.00474074
38.8	2.35e-05	0.000183585	9.95e-07	0.000194981	0.0012	0.00432818	0.0004	0.000141141	0.001	0.00631718	0.0007	0.00848649	0.0013	0.00482248	1.9955e-06	0.017221	5.8367e-09	3.99206e-05	2.6724e-06	0.000275097	1.5366e-11	0.00467668
38.9	2.26e-05	0.000183585	9.5e-07	0.000146236	0.0011	0.0042172	0.0004	0.000141141	0.0009	0.0062177	0.0007	0.00837838	0.0012	0.00471531	1.9106e-06	0.0169906	5.5032e-09	3.87956e-05	2.5634e-06	0.000275097	1.4307e-11	0.00461261
39	2.18e-05	0.000183585	9.08e-07	0.000146236	0.0011	0.00416171	0.0004	0.000141141	0.0009	0.00611822	0.0006	0.00821622	0.0012	0.00460815	1.8293e-06	0.0167027	5.1889e-09	3.77029e-05	2.4587e-06	0.000275097	1.3321e-11	0.00454855
39.1	2.1e-05	0.000183585	8.68e-07	0.000146236	0.0011	0.00410622	0.0004	0.000141141	0.0009	0.00601873	0.0006	0.00810811	0.0012	0.00460815	1.7514e-06	0.0164723	4.8924e-09	3.66412e-05	2.3584e-06	0.000275097	1.2402e-11	0.00448448
39.2	2.03e-05	0.000183585	8.29e-07	0.000146236	0.0011	0.00405073	0.0004	0.000141141	0.0009	0.00586951	0.0006	0.008	0.0012	0.00450098	1.6769e-06	0.0161843	4.6129e-09	3.56088e-05	2.2622e-06	0.000275097	1.1547e-11	0.00442042
39.3	1.95e-05	0.000183585	7.92e-07	0.000146236	0.001	0.00393975	0.0004	0.000141141	0.0008	0.00577003	0.0006	0.00789189	0.0011	0.00439381	1.6056e-06	0.0159539	4.3494e-09	3.46059e-05	2.1698e-06	0.000275097	1.0751e-11	0.00435636
39.4	1.88e-05	0.000183585	7.57e-07	0.000146236	0.001	0.00388427	0.0004	0.000141141	0.0008	0.00567054	0.0006	0.00778378	0.0011	0.00428665	1.5373e-06	0.0157235	4.101e-09	3.36316e-05	2.0813e-06	0.000275097	1.001e-11	0.00429229
39.5	1.81e-05	0.000183585	7.24e-07	0.000146236	0.001	0.00382877	0.0004	0.000141141	0.0008	0.00557106	0.0006	0.00762162	0.0011	0.00428665	1.4719e-06	0.0154932	3.8667e-09	3.26838e-05	1.9963e-06	0.000275097	9.3201e-12	0.00422823
39.6	1.75e-05	0.000183585	6.91e-07	0.000146236	0.0009	0.00377329	0.0003	0.000141141	0.0008	0.00547158	0.0005	0.00751351	0.001	0.00417948	1.4092e-06	0.0152628	3.6458e-09	3.17632e-05	1.9149e-06	0.000275097	8.6776e-12	0.00416416
39.7	1.68e-05	0.000183585	6.61e-07	0.000146236	0.0009	0.0037178	0.0003	0.000141141	0.0008	0.00537209	0.0005	0.00740541	0.001	0.00407232	1.3493e-06	0.0150324	3.4375e-09	3.08691e-05	1.8367e-06	0.000275097	8.0794e-12	0.0041001
39.8	1.62e-05	0.000183585	6.31e-07	0.000146236	0.0009	0.00360682	0.0003	7.05706e-05	0.0007	0.00527261	0.0005	0.0072973	0.001	0.00396515	1.2919e-06	0.014802	3.2411e-09	2.99993e-05	1.7618e-06	0.000275097	7.5224e-12	0.00403604
39.9	1.56e-05	0.000183585	6.03e-07	0.000146236	0.0009	0.00355133	0.0003	7.05706e-05	0.0007	0.00517313	0.0005	0.00718919	0.001	0.00396515	1.2369e-06	0.0145716	3.056e-09	2.91544e-05	1.6899e-06	0.000275097	7.0038e-12	0.00397197
40	1.51e-05	0.00012239	5.76e-07	0.000146236	0.0009	0.00349584	0.0003	7.05706e-05	0.0007	0.00507364	0.0005	0.00708108	0.0009	0.00385798	1.1843e-06	0.0143413	2.8814e-09	2.83331e-05	1.6209e-06	0.000275097	6.521e-12	0.00390791
40.1	1.45e-05	0.00012239	5.51e-07	9.74903e-05	0.0008	0.00344035	0.0003	7.05706e-05	0.0007	0.00497416	0.0005	0.00697297	0.0009	0.00375082	1.1339e-06	0.0141109	2.7168e-09	2.75353e-05	1.5548e-06	0.000275097	6.0715e-12	0.00384384
40.2	1.4e-05	0.00012239	5.26e-07	9.74903e-05	0.0008	0.00338486	0.0003	7.05706e-05	0.0007	0.00487468	0.0005	0.00686487	0.0009	0.00375082	1.0856e-06	0.0138805	2.5616e-09	2.67596e-05	1.4913e-06	0.000183398	5.6529e-12	0.00377978
40.3	1.35e-05	0.00012239	5.03e-07	9.74903e-05	0.0008	0.00332937	0.0003	7.05706e-05	0.0006	0.00477519	0.0005	0.00675676	0.0009	0.00364365	1.0395e-06	0.0136501	2.4153e-09	2.60059e-05	1.4304e-06	0.000183398	5.2632e-12	0.00371572
40.4	1.3e-05	0.00012239	4.81e-07	9.74903e-05	0.0008	0.00327388	0.0003	7.05706e-05	0.0006	0.00472545	0.0004	0.0067027	0.0009	0.00364365	9.9523e-07	0.0134773	2.2773e-09	2.52735e-05	1.3721e-06	0.000183398	4.9004e-12	0.00365165
40.5	1.25e-05	0.00012239	4.59e-07	9.74903e-05	0.0008	0.00321839	0.0003	7.05706e-05	0.0006	0.00462597	0.0004	0.00659459	0.0008	0.00353649	9.5289e-07	0.0132469	2.1472e-09	2.4561e-05	1.3161e-06	0.000183398	4.5626e-12	0.00358759
40.6	1.21e-05	0.00012239	4.39e-07	9.74903e-05	0.0007	0.0031629	0.0003	7.05706e-05	0.0006	0.00452649	0.0004	0.00648649	0.0008	0.00342932	9.1235e-07	0.0130742	2.0245e-09	2.38699e-05	1.2624e-06	0.000183398	4.248e-12	0.00352352
40.7	1.16e-05	0.00012239	4.19e-07	9.74903e-05	0.0007	0.00310741	0.0003	7.05706e-05	0.0006	0.00447674	0.0004	0.00637838	0.0008	0.00342932	8.7353e-07	0.0128438	1.9089e-09	2.31971e-05	1.2108e-06	0.000183398	3.9552e-12	0.00352352
40.8	1.12e-05	0.00012239	4.01e-07	9.74903e-05	0.0007	0.00305192	0.0002	7.05706e-05	0.0006	0.00437726	0.0004	0.00627027	0.0008	0.00332215	8.3636e-07	0.012671	1.7998e-09	2.25441e-05	1.1614e-06	0.000183398	3.6825e-12	0.00345946
40.9	1.08e-05	0.00012239	3.83e-07	9.74903e-05	0.0007	0.00299643	0.0002	7.05706e-05	0.0006	0.00427778	0.0004	0.00621622	0.0008	0.00332215	8.0078e-07	0.0124406	1.697e-09	2.19088e-05	1.114e-06	0.000183398	3.4287e-12	0.00339539
41	1.04e-05	0.00012239	3.66e-07	9.74903e-05	0.0007	0.00294094	0.0002	7.05706e-05	0.0005	0.00422804	0.0004	0.00610811	0.0007	0.00321499	7.6671e-07	0.0122678	1.6001e-09	2.12919e-05	1.0686e-06	0.000183398	3.1923e-12	0.00333133
41.1	1e-05	0.00012239	3.5e-07	9.74903e-05	0.0006	0.00288545	0.0002	7.05706e-05	0.0005	0.00412855	0.0004	0.006	0.0007	0.00321499	7.3409e-07	0.012095	1.5087e-09	2.06919e-05	1.025e-06	0.000183398	2.9722e-12	0.00326727
41.2	9.66e-06	0.00012239	3.34e-07	9.74903e-05	0.0006	0.00282996	0.0002	7.05706e-05	0.0005	0.00407881	0.0004	0.00594595	0.0007	0.00310782	7.0285e-07	0.0119222	1.4225e-09	2.01088e-05	9.8313e-07	0.000183398	2.7673e-12	0.0032032
41.3	9.31e-06	0.00012239	3.19e-07	9.74903e-05	0.0006	0.00282996	0.0002	6.86652e-05	0.0005	0.00397933	0.0003	0.00583784	0.0007	0.00310782	6.7295e-07	0.0116919	1.3412e-09	1.95426e-05	9.4301e-07	0.000183398	2.5766e-12	0.0032032
41.4	8.97e-06	0.00012239	3.05e-07	9.74903e-05	0.0006	0.00277448	0.0002	6.67598e-05	0.0005	0.00392959	0.0003	0.00572973	0.0007	0.00300065	6.4432e-07	0.0115191	1.2646e-09	1.89919e-05	9.0452e-07	0.000183398	2.3989e-12	0.00313914
41.5	8.64e-06	0.00012239	2.92e-07	9.74903e-05	0.0006	0.00271899	0.0002	6.48544e-05	0.0005	0.0038301	0.0003	0.00567568	0.0006	0.00300065	6.1691e-07	0.0113463	1.1923e-09	1.84574e-05	8.6761e-07	0.000183398	2.2336e-12	0.00307508
41.6	8.33e-06	0.00012239	2.79e-07	9.74903e-05	0.0006	0.0026635	0.0002	6.30901e-05	0.0005	0.00378036	0.0003	0.00556757	0.0006	0.00289349	5.9066e-07	0.0111735	1.1242e-09	1.79375e-05	8.322e-07	0.000183398	2.0796e-12	0.00301101
41.7	8.03e-06	0.00012239	2.66e-07	9.74903e-05	0.0006	0.00260801	0.0002	6.13258e-05	0.0004	0.00368088	0.0003	0.00551351	0.0006	0.00289349	5.6553e-07	0.0110007	1.06e-09	1.74324e-05	7.9824e-07	0.000183398	1.9362e-12	0.00301101
41.8	7.73e-06	0.00012239	2.54e-07	9.74903e-05	0.0005	0.00255252	0.0002	5.96321e-05	0.0004	0.00363114	0.0003	0.00540541	0.0006	0.00278632	5.4147e-07	0.0108279	9.9945e-10	1.69412e-05	7.6566e-07	0.000183398	1.8027e-12	0.00294695
41.9	7.45e-06	6.11951e-05	2.43e-07	4.87452e-05	0.0005	0.00255252	0.0002	5.79384e-05	0.0004	0.00358139	0.0003	0.00535135	0.0006	0.00278632	5.1843e-07	0.0106551	9.4236e-10	1.6464e-05	7.3441e-07	0.000183398	1.6785e-12	0.00288288
42	7.18e-06	6.11951e-05	2.32e-07	4.87452e-05	0.0005	0.00249703	0.0002	5.63859e-05	0.0004	0.00348191	0.0003	0.00524324	0.0006	0.00267916	4.9637e-07	0.01054	8.8852e-10	1.6e-05	7.0444e-07	0.000183398	1.5628e-12	0.00288288
42.1	6.92e-06	6.11951e-05	2.22e-07	4.87452e-05	0.0005	0.00244154	0.0002	5.47628e-05	0.0004	0.00343217	0.0003	0.00518919	0.0006	0.00267916	4.7525e-07	0.0103672	8.3777e-10	1.55493e-05	6.7569e-07	0.000183398	1.455e-12	0.00281882
42.2	6.67e-06	6.11951e-05	2.12e-07	4.87452e-05	0.0005	0.00238605	0.0002	5.32808e-05	0.0004	0.00338243	0.0003	0.00508108	0.0005	0.00257199	4.5503e-07	0.0101944	7.8991e-10	1.51118e-05	6.4812e-07	9.16988e-05	1.3547e-12	0.00275475
42.3	6.43e-06	6.11951e-05	2.03e-07	4.87452e-05	0.0005	0.00238605	0.0002	5.17988e-05	0.0004	0.00333269	0.0003	0.00502703	0.0005	0.00257199	4.3567e-07	0.0100216	7.4478e-10	1.4686e-05	6.2167e-07	9.16988e-05	1.2613e-12	0.00275475
42.4	6.19e-06	6.11951e-05	1.94e-07	4.87452e-05	0.0005	0.00233056	0.0002	5.03874e-05	0.0004	0.0032332	0.0003	0.00497297	0.0005	0.00246482	4.1714e-07	0.00990641	7.0224e-10	1.42721e-05	5.963e-07	9.16988e-05	1.1744e-12	0.00269069
42.5	5.97e-06	6.11951e-05	1.85e-07	4.87452e-05	0.0005	0.00227507	0.0002	4.8976e-05	0.0004	0.00318346	0.0003	0.00486487	0.0005	0.00246482	3.9939e-07	0.00973362	6.6212e-10	1.38706e-05	5.7196e-07	9.16988e-05	1.0934e-12	0.00262663
42.6	5.75e-06	6.11951e-05	1.77e-07	4.87452e-05	0.0004	0.00221958	0.0001	4.75646e-05	0.0004	0.00313372	0.0002	0.00481081	0.0005	0.00246482	3.824e-07	0.00956084	6.2429e-10	1.34794e-05	5.4862e-07	9.16988e-05	1.018e-12	0.00262663
42.7	5.54e-06	6.11951e-05	1.69e-07	4.87452e-05	0.0004	0.00221958	0.0001	4.62943e-05	0.0003	0.00308398	0.0002	0.00475676	0.0005	0.00235766	3.6613e-07	0.00944564	5.8863e-10	1.31e-05	5.2623e-07	9.16988e-05	9.4786e-13	0.00256256
42.8	5.34e-06	6.11951e-05	1.61e-07	4.87452e-05	0.0004	0.00216409	0.0001	4.5024e-05	0.0003	0.00303424	0.0002	0.00464865	0.0005	0.00235766	3.5055e-07	0.00927286	5.55e-10	1.27309e-05	5.0475e-07	9.16988e-05	8.8252e-13	0.0024985
42.9	5.15e-06	6.11951e-05	1.54e-07	4.87452e-05	0.0004	0.0021086	0.0001	4.37538e-05	0.0003	0.0029845	0.0002	0.00459459	0.0005	0.00225049	3.3563e-07	0.00915767	5.233e-10	1.23721e-05	4.8416e-07	9.16988e-05	8.2168e-13	0.0024985
43	4.96e-06	6.11951e-05	1.47e-07	4.87452e-05	0.0004	0.0021086	0.0001	4.25541e-05	0.0003	0.00288501	0.0002	0.00454054	0.0004	0.00225049	3.2135e-07	0.00898488	4.934e-10	1.20235e-05	4.644e-07	9.16988e-05	7.6504e-13	0.00243443
43.1	4.78e-06	6.11951e-05	1.41e-07	4.87452e-05	0.0004	0.00205311	0.0001	4.13544e-05	0.0003	0.00283527	0.0002	0.00448649	0.0004	0.00225049	3.0768e-07	0.00886969	4.6522e-10	1.16853e-05	4.4544e-07	9.16988e-05	7.123e-13	0.00243443
43.2	4.6e-06	6.11951e-05	1.35e-07	4.87452e-05	0.0004	0.00199762	0.0001	4.02252e-05	0.0003	0.00278553	0.0002	0.00437838	0.0004	0.00214333	2.9459e-07	0.0087545	4.3864e-10	1.13559e-05	4.2727e-07	9.16988e-05	6.6319e-13	0.00237037
43.3	4.44e-06	6.07055e-05	1.29e-07	4.83065e-05	0.0004	0.00199762	0.0001	3.90961e-05	0.0003	0.00273579	0.0002	0.00432432	0.0004	0.00214333	2.8206e-07	0.00858171	4.1358e-10	1.1036e-05	4.0983e-07	9.16988e-05	6.1748e-13	0.00230631
43.4	4.28e-06	5.89921e-05	1.23e-07	4.69416e-05	0.0004	0.00194213	0.0001	3.7967e-05	0.0003	0.00268605	0.0002	0.00427027	0.0004	0.00203616	2.7006e-07	0.00846652	3.8996e-10	1.0725e-05	3.931e-07	9.16988e-05	5.7491e-13	0.00230631
43.5	4.12e-06	5.7401e-05	1.17e-07	4.56255e-05	0.0003	0.00194213	0.0001	3.69084e-05	0.0003	0.0026363	0.0002	0.00421622	0.0004	0.00203616	2.5857e-07	0.00835133	3.6768e-10	1.04228e-05	3.7706e-07	9.16988e-05	5.3528e-13	0.00224224
43.6	3.97e-06	5.58099e-05	1.12e-07	4.43094e-05	0.0003	0.00188664	0.0001	3.59204e-05	0.0003	0.00258656	0.0002	0.00416216	0.0004	0.00203616	2.4756e-07	0.00823614	3.4667e-10	1.01294e-05	3.6167e-07	9.16988e-05	4.9838e-13	0.00224224
43.7	3.83e-06	5.42801e-05	1.07e-07	4.30907e-05	0.0003	0.00183115	0.0001	3.49324e-05	0.0003	0.00253682	0.0002	0.00410811	0.0004	0.00192899	2.3703e-07	0.00806335	3.2687e-10	9.84412e-06	3.4691e-07	9.16988e-05	4.6402e-13	0.00217818
43.8	3.69e-06	5.28114e-05	1.02e-07	4.18721e-05	0.0003	0.00183115	0.0001	3.39444e-05	0.0003	0.00248708	0.0002	0.004	0.0004	0.00192899	2.2695e-07	0.00794816	3.082e-10	9.56691e-06	3.3275e-07	9.11202e-05	4.3203e-13	0.00217818
43.9	3.55e-06	5.13427e-05	9.79e-08	4.07022e-05	0.0003	0.00177566	0.0001	3.3027e-05	0.0003	0.00243734	0.0002	0.00394595	0.0004	0.00192899	2.1729e-07	0.00783297	2.9059e-10	9.29779e-06	3.1917e-07	8.88708e-05	4.0225e-13	0.00211411
44	3.42e-06	4.99352e-05	9.36e-08	3.95323e-05	0.0003	0.00177566	9.91e-05	3.21096e-05	0.0002	0.00243734	0.0002	0.00389189	0.0003	0.00182183	2.0805e-07	0.00771778	2.7399e-10	9.03529e-06	3.0615e-07	8.66765e-05	3.7452e-13	0.00211411
44.1	3.3e-06	4.85889e-05	8.94e-08	3.84112e-05	0.0003	0.00172017	9.63e-05	3.11922e-05	0.0002	0.0023876	0.0002	0.00383784	0.0003	0.00182183	1.9919e-07	0.00760259	2.5834e-10	8.78088e-06	2.9365e-07	8.45362e-05	3.487e-13	0.00205005
44.2	3.18e-06	4.72426e-05	8.54e-08	3.73388e-05	0.0003	0.00172017	9.36e-05	3.03453e-05	0.0002	0.00233785	0.0002	0.00378378	0.0003	0.00182183	1.9072e-07	0.0074874	2.4358e-10	8.53382e-06	2.8167e-07	8.24492e-05	3.2466e-13	0.00205005
44.3	3.06e-06	4.59575e-05	8.16e-08	3.63152e-05	0.0003	0.00166468	9.09e-05	2.94985e-05	0.0002	0.00228811	0.0002	0.00372973	0.0003	0.00182183	1.826e-07	0.00737221	2.2966e-10	8.29338e-06	2.7018e-07	8.04135e-05	3.0228e-13	0.00198599
44.4	2.95e-06	4.47336e-05	7.8e-08	3.52915e-05	0.0003	0.00166468	8.84e-05	2.86517e-05	0.0002	0.00223837	0.0002	0.00367568	0.0003	0.00171466	1.7484e-07	0.00725702	2.1654e-10	8.05956e-06	2.5915e-07	7.84282e-05	2.8144e-13	0.00198599
44.5	2.85e-06	4.35097e-05	7.46e-08	3.42679e-05	0.0003	0.00160919	8.59e-05	2.78754e-05	0.0002	0.00218863	0.0001	0.00362162	0.0003	0.00171466	1.674e-07	0.00714183	2.0417e-10	7.83309e-06	2.4857e-07	7.64915e-05	2.6204e-13	0.00192192
44.6	2.74e-06	4.22858e-05	7.12e-08	3.3293e-05	0.0003	0.00160919	8.35e-05	2.70991e-05	0.0002	0.00213889	0.0001	0.00356757	0.0003	0.00171466	1.6027e-07	0.00702664	1.9251e-10	7.6125e-06	2.3843e-07	7.46034e-05	2.4398e-13	0.00192192
44.7	2.64e-06	4.11231e-05	6.81e-08	3.23668e-05	0.0003	0.00155371	8.11e-05	2.63228e-05	0.0002	0.00213889	0.0001	0.00351351	0.0003	0.00160749	1.5346e-07	0.00691145	1.8151e-10	7.39779e-06	2.287e-07	7.27612e-05	2.2716e-13	0.00185786
44.8	2.55e-06	4.00216e-05	6.5e-08	3.14406e-05	0.0002	0.00155371	7.88e-05	2.56171e-05	0.0002	0.00208915	0.0001	0.00345946	0.0003	0.00160749	1.4693e-07	0.00679626	1.7114e-10	7.18934e-06	2.1937e-07	7.09648e-05	2.115e-13	0.00185786
44.9	2.45e-06	3.89201e-05	6.22e-08	3.05632e-05	0.0002	0.00149822	7.66e-05	2.49114e-05	0.0002	0.00203941	0.0001	0.0034054	0.0003	0.00160749	1.4068e-07	0.00673866	1.6137e-10	6.98684e-06	2.1041e-07	6.92125e-05	1.9692e-13	0.00179379
45	2.36e-06	3.78186e-05	5.94e-08	2.97346e-05	0.0002	0.00149822	7.44e-05	2.42057e-05	0.0002	0.00198966	0.0001	0.00335135	0.0003	0.00160749	1.3469e-07	0.00662347	1.5215e-10	6.79007e-06	2.0183e-07	6.75041e-05	1.8334e-13	0.00179379
45.1	2.28e-06	3.67783e-05	5.68e-08	2.88571e-05	0.0002	0.00144273	7.23e-05	2.35706e-05	0.0002	0.00198966	0.0001	0.0032973	0.0003	0.00150033	1.2896e-07	0.00650828	1.4346e-10	6.59882e-06	1.9359e-07	6.5837e-05	1.707e-13	0.00179379
45.2	2.2e-06	3.57991e-05	5.42e-08	2.80772e-05	0.0002	0.00144273	7.03e-05	2.28649e-05	0.0002	0.00193992	0.0001	0.00324324	0.0003	0.00150033	1.2347e-07	0.00639309	1.3526e-10	6.41294e-06	1.8569e-07	6.42112e-05	1.5894e-13	0.00172973
45.3	2.12e-06	3.482e-05	5.18e-08	2.72486e-05	0.0002	0.00138724	6.83e-05	2.22297e-05	0.0002	0.00189018	0.0001	0.00318919	0.0003	0.00150033	1.1822e-07	0.00633549	1.2753e-10	6.23228e-06	1.7811e-07	6.26257e-05	1.4798e-13	0.00172973
45.4	2.04e-06	3.38409e-05	4.95e-08	2.65174e-05	0.0002	0.00138724	6.64e-05	2.16652e-05	0.0002	0.00184044	0.0001	0.00318919	0.0002	0.00150033	1.1319e-07	0.0062203	1.2025e-10	6.05676e-06	1.7084e-07	6.10797e-05	1.3778e-13	0.00166567
45.5	1.96e-06	3.2923e-05	4.73e-08	2.57375e-05	0.0002	0.00138724	6.45e-05	2.103e-05	0.0002	0.00184044	0.0001	0.00313513	0.0002	0.00139316	1.0837e-07	0.00610511	1.1338e-10	5.88618e-06	1.6387e-07	5.95722e-05	1.2828e-13	0.00166567
45.6	1.89e-06	3.2005e-05	4.52e-08	2.5055e-05	0.0002	0.00133175	6.27e-05	2.04655e-05	0.0002	0.0017907	0.0001	0.00308108	0.0002	0.00139316	1.0376e-07	0.00604752	1.069e-10	5.72037e-06	1.5718e-07	5.81013e-05	1.1944e-13	0.00166567
45.7	1.82e-06	3.11483e-05	4.32e-08	2.43238e-05	0.0002	0.00133175	6.1e-05	1.99009e-05	0.0002	0.00174096	0.0001	0.00302703	0.0002	0.00139316	9.9348e-08	0.00593232	1.008e-10	5.55919e-06	1.5077e-07	5.66662e-05	1.112e-13	0.0016016
45.8	1.76e-06	3.02916e-05	4.13e-08	2.36414e-05	0.0002	0.00127626	5.92e-05	1.93363e-05	0.0002	0.00174096	0.0001	0.00297297	0.0002	0.00139316	9.5121e-08	0.00581714	9.5037e-11	5.40265e-06	1.4461e-07	5.52678e-05	1.0354e-13	0.0016016
45.9	1.69e-06	2.9496e-05	3.95e-08	2.2959e-05	0.0002	0.00127626	5.76e-05	1.87718e-05	0.0001	0.00169121	0.0001	0.00291892	0.0002	0.001286	9.1074e-08	0.00575954	8.9608e-11	5.25044e-06	1.3871e-07	5.39024e-05	9.6399e-14	0.00153754
46	1.63e-06	2.86393e-05	3.77e-08	2.23253e-05	0.0002	0.00122077	5.59e-05	1.82778e-05	0.0001	0.00164147	9.74e-05	0.00291892	0.0002	0.001286	8.7199e-08	0.00564435	8.4489e-11	5.10257e-06	1.3305e-07	5.25719e-05	8.9754e-14	0.00153754
46.1	1.57e-06	2.7905e-05	3.6e-08	2.16916e-05	0.0002	0.00122077	5.44e-05	1.77838e-05	0.0001	0.00164147	9.48e-05	0.00286486	0.0002	0.001286	8.3489e-08	0.00558675	7.9662e-11	4.95882e-06	1.2762e-07	5.12743e-05	8.3566e-14	0.00153754
46.2	1.52e-06	2.71094e-05	3.44e-08	2.11067e-05	0.0002	0.00122077	5.28e-05	1.72898e-05	0.0001	0.00159173	9.23e-05	0.00281081	0.0002	0.001286	7.9937e-08	0.00547156	7.5112e-11	4.81919e-06	1.2241e-07	5.0008e-05	7.7805e-14	0.00147347
46.3	1.46e-06	2.63751e-05	3.29e-08	2.0473e-05	0.0002	0.00116528	5.13e-05	1.67958e-05	0.0001	0.00159173	8.98e-05	0.00275676	0.0002	0.00117883	7.6536e-08	0.00541397	7.0821e-11	4.68346e-06	1.1742e-07	4.87737e-05	7.2442e-14	0.00147347
46.4	1.41e-06	2.56407e-05	3.14e-08	1.99368e-05	0.0002	0.00116528	4.99e-05	1.63018e-05	0.0001	0.00154199	8.74e-05	0.0027027	0.0002	0.00117883	7.3279e-08	0.00535637	6.6775e-11	4.55154e-06	1.1263e-07	4.75688e-05	6.7448e-14	0.00147347
46.5	1.36e-06	2.49676e-05	3e-08	1.93518e-05	0.0002	0.00116528	4.85e-05	1.58784e-05	0.0001	0.00154199	8.51e-05	0.0027027	0.0002	0.00117883	7.0162e-08	0.00524118	6.296e-11	4.42331e-06	1.0803e-07	4.6395e-05	6.2798e-14	0.00140941
46.6	1.31e-06	2.42945e-05	2.87e-08	1.88156e-05	0.0002	0.00110979	4.71e-05	1.5455e-05	0.0001	0.00149225	8.28e-05	0.00264865	0.0002	0.00117883	6.7177e-08	0.00518359	5.9364e-11	4.29875e-06	1.0362e-07	4.52488e-05	5.8469e-14	0.00140941
46.7	1.26e-06	2.36213e-05	2.74e-08	1.82794e-05	0.0002	0.00110979	4.58e-05	1.50315e-05	0.0001	0.00144251	8.06e-05	0.00259459	0.0002	0.00117883	6.4318e-08	0.00506839	5.5972e-11	4.17765e-06	9.9392e-08	4.41319e-05	5.4438e-14	0.00140941
46.8	1.21e-06	2.29482e-05	2.62e-08	1.77432e-05	0.0001	0.00110979	4.45e-05	1.46081e-05	0.0001	0.00144251	7.84e-05	0.00259459	0.0002	0.00107166	6.1582e-08	0.0050108	5.2775e-11	4.05993e-06	9.5336e-08	4.30425e-05	5.0686e-14	0.00134534
46.9	1.17e-06	2.23362e-05	2.5e-08	1.72558e-05	0.0001	0.0010543	4.33e-05	1.41847e-05	0.0001	0.00139277	7.64e-05	0.00254054	0.0002	0.00107166	5.8962e-08	0.0049532	4.976e-11	3.94559e-06	9.1445e-08	4.19797e-05	4.7191e-14	0.00134534
47	1.13e-06	2.17243e-05	2.39e-08	1.67683e-05	0.0001	0.0010543	4.2e-05	1.37613e-05	0.0001	0.00139277	7.43e-05	0.00248649	0.0002	0.00107166	5.6453e-08	0.00483801	4.6917e-11	3.83449e-06	8.7713e-08	4.09435e-05	4.3938e-14	0.00134534
47.1	1.09e-06	2.11123e-05	2.29e-08	1.63296e-05	0.0001	0.0010543	4.09e-05	1.34084e-05	0.0001	0.00134302	7.23e-05	0.00243243	0.0002	0.00107166	5.4051e-08	0.00478042	4.4237e-11	3.72647e-06	8.4134e-08	3.99321e-05	4.0909e-14	0.00128128
47.2	1.05e-06	2.05616e-05	2.19e-08	1.58422e-05	0.0001	0.000998811	3.97e-05	1.30556e-05	0.0001	0.00134302	7.04e-05	0.00243243	0.0002	0.00107166	5.1752e-08	0.00472282	4.171e-11	3.62147e-06	8.07e-08	3.89463e-05	3.8089e-14	0.00128128
47.3	1.01e-06	1.99496e-05	2.09e-08	1.54035e-05	0.0001	0.000998811	3.86e-05	1.26321e-05	0.0001	0.00129328	6.85e-05	0.00237838	0.0002	0.00107166	4.955e-08	0.00460763	3.9327e-11	3.51949e-06	7.7407e-08	3.79844e-05	3.5463e-14	0.00128128
47.4	9.72e-07	1.946e-05	2e-08	1.49648e-05	0.0001	0.000998811	3.75e-05	1.22793e-05	0.0001	0.00129328	6.67e-05	0.00232432	0.0001	0.000964496	4.7442e-08	0.00455004	3.7081e-11	3.42037e-06	7.4248e-08	3.70472e-05	3.3019e-14	0.00121722
47.5	9.37e-07	1.89093e-05	1.91e-08	1.45261e-05	0.0001	0.000943321	3.64e-05	1.1997e-05	9.75e-05	0.00124354	6.49e-05	0.00232432	0.0001	0.000964496	4.5423e-08	0.00449244	3.4962e-11	3.32404e-06	7.1217e-08	3.61321e-05	3.0742e-14	0.00121722
47.6	9.03e-07	1.83585e-05	1.82e-08	1.41361e-05	0.0001	0.000943321	3.54e-05	1.16441e-05	9.5e-05	0.00124354	6.32e-05	0.00227027	0.0001	0.000964496	4.349e-08	0.00443484	3.2965e-11	3.23037e-06	6.8311e-08	3.52399e-05	2.8623e-14	0.00121722
47.7	8.7e-07	1.7869e-05	1.74e-08	1.37461e-05	0.0001	0.000943321	3.44e-05	1.12913e-05	9.25e-05	0.0011938	6.15e-05	0.00227027	0.0001	0.000964496	4.164e-08	0.00437725	3.1082e-11	3.13941e-06	6.5523e-08	3.43696e-05	2.665e-14	0.00115315
47.8	8.38e-07	1.73794e-05	1.66e-08	1.33562e-05	0.0001	0.000887832	3.35e-05	1.1009e-05	9.01e-05	0.0011938	5.99e-05	0.00221622	0.0001	0.000964496	3.9868e-08	0.00431965	2.9306e-11	3.05096e-06	6.2849e-08	3.35214e-05	2.4813e-14	0.00115315
47.9	8.08e-07	1.68898e-05	1.59e-08	1.29662e-05	0.0001	0.000887832	3.25e-05	1.07267e-05	8.78e-05	0.0011938	5.83e-05	0.00216216	0.0001	0.000964496	3.8172e-08	0.00420446	2.7632e-11	2.965e-06	6.0284e-08	3.26934e-05	2.3102e-14	0.00115315
48	7.78e-07	1.64615e-05	1.52e-08	1.2625e-05	0.0001	0.000887832	3.16e-05	1.03739e-05	8.55e-05	0.00114406	5.67e-05	0.00216216	0.0001	0.00085733	3.6548e-08	0.00414687	2.6053e-11	2.88154e-06	5.7824e-08	3.18864e-05	2.151e-14	0.00115315
48.1	7.5e-07	1.59719e-05	1.45e-08	1.2235e-05	0.0001	0.000887832	3.07e-05	1.00916e-05	8.33e-05	0.00114406	5.52e-05	0.00210811	0.0001	0.00085733	3.4993e-08	0.00408927	2.4565e-11	2.80037e-06	5.5464e-08	3.10997e-05	2.0027e-14	0.00108909
48.2	7.23e-07	1.55436e-05	1.39e-08	1.18938e-05	0.0001	0.000832342	2.98e-05	9.80931e-06	8.11e-05	0.00109432	5.37e-05	0.00210811	0.0001	0.00085733	3.3504e-08	0.00403168	2.3162e-11	2.72147e-06	5.3201e-08	3.03312e-05	1.8646e-14	0.00108909
48.3	6.96e-07	1.51152e-05	1.33e-08	1.15526e-05	0.0001	0.000832342	2.9e-05	9.52703e-06	7.9e-05	0.00109432	5.23e-05	0.00205405	0.0001	0.00085733	3.2079e-08	0.00397408	2.1839e-11	2.64485e-06	5.103e-08	2.9582e-05	1.7361e-14	0.00108909
48.4	6.71e-07	1.46868e-05	1.27e-08	1.12601e-05	9.93e-05	0.000832342	2.82e-05	9.31532e-06	7.69e-05	0.00104457	5.09e-05	0.002	0.0001	0.00085733	3.0714e-08	0.00391649	2.0591e-11	2.57029e-06	4.8947e-08	2.88521e-05	1.6164e-14	0.00108909
48.5	6.47e-07	1.43197e-05	1.21e-08	1.09189e-05	9.68e-05	0.000832342	2.74e-05	9.03303e-06	7.49e-05	0.00104457	4.95e-05	0.002	0.0001	0.00085733	2.9407e-08	0.00385889	1.9415e-11	2.49794e-06	4.6949e-08	2.81396e-05	1.505e-14	0.00102502
48.6	6.23e-07	1.39525e-05	1.16e-08	1.06264e-05	9.43e-05	0.000776853	2.66e-05	8.75075e-06	7.3e-05	0.00104457	4.82e-05	0.00194595	0.0001	0.00085733	2.8156e-08	0.0038013	1.8306e-11	2.42757e-06	4.5033e-08	2.74445e-05	1.4012e-14	0.00102502
48.7	6.01e-07	1.35241e-05	1.11e-08	1.0334e-05	9.2e-05	0.000776853	2.59e-05	8.53904e-06	7.11e-05	0.000994832	4.69e-05	0.00194595	0.0001	0.000750164	2.6958e-08	0.0037437	1.726e-11	2.35919e-06	4.3196e-08	2.67678e-05	1.3046e-14	0.00102502
48.8	5.79e-07	1.31569e-05	1.06e-08	1.00415e-05	8.96e-05	0.000776853	2.51e-05	8.32733e-06	6.92e-05	0.000994832	4.57e-05	0.00189189	0.0001	0.000750164	2.5811e-08	0.0036861	1.6274e-11	2.29272e-06	4.1433e-08	2.61067e-05	1.2147e-14	0.00102502
48.9	5.58e-07	1.27898e-05	1.01e-08	9.74903e-06	8.74e-05	0.000776853	2.44e-05	8.04505e-06	6.74e-05	0.000994832	4.45e-05	0.00189189	0.0001	0.000750164	2.4713e-08	0.00362851	1.5344e-11	2.22816e-06	3.9742e-08	2.5462e-05	1.1309e-14	0.000960961
49	5.37e-07	1.24838e-05	9.64e-09	9.45656e-06	8.51e-05	0.000721363	2.37e-05	7.83333e-06	6.57e-05	0.00094509	4.33e-05	0.00183784	9.96e-05	0.000750164	2.3661e-08	0.00357091	1.4468e-11	2.16537e-06	3.812e-08	2.4833e-05	1.053e-14	0.000960961
49.1	5.18e-07	1.21166e-05	9.21e-09	9.21284e-06	8.3e-05	0.000721363	2.31e-05	7.62162e-06	6.4e-05	0.00094509	4.21e-05	0.00183784	9.72e-05	0.000750164	2.2655e-08	0.00351332	1.3641e-11	2.10441e-06	3.6564e-08	2.42204e-05	0	0.000960961
49.2	4.99e-07	1.18107e-05	8.8e-09	8.96911e-06	8.09e-05	0.000721363	2.24e-05	7.40991e-06	6.23e-05	0.00094509	4.1e-05	0.00178378	9.48e-05	0.000750164	2.1691e-08	0.00345572	1.2862e-11	2.04515e-06	3.5072e-08	2.36225e-05	0	0.000960961
49.3	4.81e-07	1.14435e-05	8.41e-09	8.67664e-06	7.88e-05	0.000721363	2.18e-05	7.1982e-06	6.07e-05	0.000895349	3.99e-05	0.00178378	9.24e-05	0.000750164	2.0768e-08	0.00339813	1.2127e-11	1.9875e-06	3.3641e-08	2.30384e-05	0	0.000896897
49.4	4.63e-07	1.11375e-05	8.04e-09	8.43292e-06	7.68e-05	0.000721363	2.12e-05	7.00766e-06	5.91e-05	0.000895349	3.88e-05	0.00172973	9.01e-05	0.000750164	1.9884e-08	0.00334053	1.1434e-11	1.93154e-06	3.2268e-08	2.24699e-05	0	0.000896897
49.5	4.47e-07	1.08315e-05	7.68e-09	8.23793e-06	7.49e-05	0.000665874	2.06e-05	6.81712e-06	5.76e-05	0.000845607	3.78e-05	0.00172973	8.79e-05	0.000642997	1.9038e-08	0.00328294	1.0781e-11	1.87713e-06	3.0951e-08	2.19151e-05	0	0.000896897
49.6	4.3e-07	1.05256e-05	7.34e-09	7.99421e-06	7.3e-05	0.000665874	2e-05	6.62658e-06	5.61e-05	0.000845607	3.68e-05	0.00167568	8.57e-05	0.000642997	1.8228e-08	0.00322534	1.0165e-11	1.82426e-06	2.9688e-08	2.13741e-05	0	0.000896897
49.7	4.15e-07	1.02808e-05	7.01e-09	7.75048e-06	7.12e-05	0.000665874	1.94e-05	6.44309e-06	5.46e-05	0.000845607	3.58e-05	0.00167568	8.36e-05	0.000642997	1.7453e-08	0.00322534	9.5845e-12	1.77287e-06	2.8476e-08	2.08468e-05	0	0.000896897
49.8	4e-07	9.9748e-06	6.7e-09	7.5555e-06	6.94e-05	0.000665874	1.89e-05	6.25961e-06	5.32e-05	0.000845607	3.49e-05	0.00162162	8.16e-05	0.000642997	1.671e-08	0.00316775	9.037e-12	1.72294e-06	2.7314e-08	2.03315e-05	0	0.000832833
49.9	3.85e-07	9.73002e-06	6.4e-09	7.31178e-06	6.76e-05	0.000610384	1.84e-05	6.09024e-06	5.18e-05	0.000795866	3.39e-05	0.00162162	7.96e-05	0.000642997	1.5999e-08	0.00311015	8.5207e-12	1.67441e-06	2.6199e-08	1.98299e-05	0	0.000832833
50	3.71e-07	9.42405e-06	6.12e-09	7.1168e-06	6.59e-05	0.000610384	1.78e-05	5.92087e-06	5.05e-05	0.000795866	3.3e-05	0.00156757	7.76e-05	0.000642997	1.5319e-08	0.00305256	8.034e-12	1.62728e-06	2.513e-08	1.93402e-05	0	0.000832833
50.1	3.58e-07	9.17927e-06	5.85e-09	6.92181e-06	6.42e-05	0.000610384	1.73e-05	5.75856e-06	4.92e-05	0.000795866	3.22e-05	0.00156757	7.57e-05	0.000642997	1.4667e-08	0.00299496	7.575e-12	1.5814e-06	2.4105e-08	1.88625e-05	0	0.000832833
50.2	3.45e-07	8.93449e-06	5.59e-09	6.72683e-06	6.26e-05	0.000610384	1.69e-05	5.59625e-06	4.79e-05	0.000746124	3.13e-05	0.00156757	7.38e-05	0.000642997	1.4043e-08	0.00293736	7.1423e-12	1.53684e-06	2.3121e-08	1.83966e-05	0	0.000832833
50.3	3.32e-07	8.6897e-06	5.34e-09	6.53185e-06	6.1e-05	0.000610384	1.64e-05	5.44099e-06	4.67e-05	0.000746124	3.05e-05	0.00151351	7.2e-05	0.000642997	1.3445e-08	0.00293736	6.7343e-12	1.4936e-06	2.2177e-08	1.79427e-05	0	0.000768769
50.4	3.2e-07	8.44492e-06	5.1e-09	6.33687e-06	5.95e-05	0.000610384	1.59e-05	5.28574e-06	4.55e-05	0.000746124	2.96e-05	0.00151351	7.02e-05	0.000535831	1.2873e-08	0.00287977	6.3496e-12	1.45147e-06	2.1272e-08	1.74998e-05	0	0.000768769
50.5	3.08e-07	8.20014e-06	4.88e-09	6.19064e-06	5.8e-05	0.000554895	1.55e-05	5.14459e-06	4.43e-05	0.000746124	2.89e-05	0.00145946	6.85e-05	0.000535831	1.2326e-08	0.00282217		1.41059e-06	2.0404e-08	1.70679e-05		0.000768769
		8.01656e-06		5.99566e-06		0.000554895	1.5e-05	4.9964e-06	4.31e-05	0.000696382	2.81e-05	0.00145946	6.68e-05	0.000535831		0.00276458		1.37088e-06	1.9571e-08	1.66461e-05		0.000768769
		7.77178e-06		5.84942e-06		0.000554895	1.46e-05	4.86231e-06		0.000696382	2.73e-05	0.00145946	6.51e-05	0.000535831		0.00276458		1.33228e-06	1.8773e-08	1.62353e-05		0.000768769
		7.527e-06		5.65444e-06		0.000554895	1.42e-05	4.72823e-06		0.000696382		0.0014054	6.35e-05	0.000535831		0.00270698		1.29478e-06		1.58346e-05		0.000704705
		7.34341e-06		5.5082e-06		0.000554895	1.38e-05	4.59414e-06		0.000646641		0.0014054		0.000535831		0.00264939		1.25831e-06		1.5443e-05		0.000704705
		7.15983e-06		5.36197e-06		0.000499405	1.34e-05	4.46712e-06		0.000646641		0.00135135		0.000535831		0.00259179		1.22287e-06		1.50625e-05		0.000704705
		6.97624e-06		5.21573e-06		0.000499405	1.3e-05	4.34009e-06		0.000646641		0.00135135		0.000535831		0.00259179		1.18838e-06		1.46902e-05		0.000704705
		6.73146e-06		5.0695e-06		0.000499405		4.22012e-06		0.000646641		0.00135135		0.000535831		0.0025342		1.15493e-06		1.43279e-05		0.000704705
		6.54788e-06		4.92326e-06		0.000499405		4.10721e-06		0.000646641		0.0012973		0.000535831		0.0024766		1.12235e-06		1.3974e-05		0.000704705
		6.42549e-06		4.77215e-06		0.000499405		3.98724e-06		0.000596899		0.0012973		0.000535831		0.0024766		1.09081e-06		1.36292e-05		0.000640641
		6.2419e-06		4.64054e-06		0.000499405				0.000596899		0.0012973		0.000428665		0.00241901		1.06007e-06		1.32927e-05		0.000640641
		6.0522e-06		4.50893e-06		0.000499405						0.00124324		0.000428665		0.00236141		1.03022e-06		1.29644e-05		0.000640641
		5.88697e-06				0.000443916						0.00124324		0.000428665		0.00236141		1.00118e-06		1.26444e-05		0.000640641
		5.72174e-06				0.000443916						0.00124324						9.72941e-07				0.000640641
		5.56875e-06				0.000443916						0.00118919						9.45588e-07				0.000640641
		5.41577e-06				0.000443916						0.00118919						9.18897e-07				0.000640641
		5.26278e-06				0.000443916						0.00118919										0.000576577
						0.000443916						0.00113514										0.000576577
						0.000443916																0.000576577
						0.000388426																0.000576577
						0.000388426																0.000576577
						0.000388426																0.000576577
						0.000388426																0.000576577
						0.000388426																0.000512513
						0.000388426																0.000512513
						0.000388426																0.000512513
						0.000388426
						0.000332937
						0.000332937
						0.000332937

## Sheet: Fig 3Bii
delay	3 ms	4 ms	5 ms	6 ms	7 ms	8 ms	9 ms	10 ms	15 ms	20 ms		3 ms	4 ms	5 ms	6 ms	7 ms	8 ms	9 ms	10 ms	15 ms	20 ms
NO autapse											autapse
cell 1	0.70788	0.73653	0.762	0.78965	0.81127	0.82961	0.84819	0.86426	0.9251	1		0.5332	0.5869	0.6364	0.68145	0.72261	0.75819	0.79022	0.81919	0.91108	1
cell 2	0.57425	0.61881	0.65482	0.68364	0.70937	0.73176	0.75211	0.77032	0.84817	0.889		0.57089	0.61595	0.6524	0.68151	0.70633	0.72983	0.7503	0.76892	0.8481	0.889
cell 3	0.92265	0.95397	0.98179	0.99	0.99915	1	1	1	1	1		0.78003	0.81769	0.8531	0.88724	0.92308	0.95841	0.98775	0.99041	1	1
cell 4	0.72304	0.76583	0.79458	0.82547	0.84891	0.86516	0.88361	0.89866	0.94581	1		0.6657	0.71141	0.75562	0.77962	0.81036	0.84048	0.85973	0.88038	0.93966	1
cell 5	0.6882	0.72295	0.75349	0.781	0.80716	0.826	0.84771	0.86572	0.92936	1		0.57013	0.60503	0.63976	0.67247	0.70775	0.73685	0.76674	0.7931	0.89416	0.9987
cell 6	0.69178	0.75817	0.80952	0.84402	0.87923	0.90182	0.92223	0.9403	0.98148	1		0.66022	0.72837	0.78217	0.82249	0.86473	0.89489	0.91691	0.93719	0.9793	1
cell 7	0.76307	0.81558	0.8589	0.89115	0.91762	0.93756	0.95152	0.96754	0.98933	1		0.69909	0.75947	0.80875	0.85032	0.88701	0.91173	0.92983	0.94628	0.98776	1
cell 8	0.79097	0.82654	0.851	0.87623	0.89506	0.91529	0.92525	0.93911	0.97587	1		0.60246	0.65578	0.70219	0.7456	0.78637	0.81912	0.84444	0.87416	0.95105	1
cell 9	0.62447	0.68158	0.72666	0.76186	0.79314	0.82145	0.84792	0.86349	0.93716	1		0.63883	0.67846	0.72147	0.75717	0.78828	0.8176	0.843	0.85667	0.93268	1
cell 10	0.60341	0.64624	0.68077	0.70974	0.7382	0.76308	0.78523	0.80631	0.88629	0.9566		0.60097	0.6435	0.6786	0.70767	0.73611	0.76167	0.78415	0.80522	0.88439	0.9566
cell 11	0.50693	0.56693	0.61111	0.65294	0.68342	0.71158	0.72975	0.76117	0.8382	0.9		0.49238	0.55585	0.60026	0.64459	0.6741	0.70065	0.72475	0.75235	0.84132	0.901
cell 12	0.60897	0.65394	0.68878	0.71882	0.74606	0.76809	0.79045	0.81071	0.8884	0.9589		0.56224	0.61217	0.65047	0.68458	0.7167	0.7462	0.76897	0.79327	0.88176	0.959
cell 13	0.76847	0.83259	0.87512	0.90937	0.93142	0.94838	0.96168	0.97283	1	1		0.74136	0.80854	0.85707	0.89749	0.92135	0.94225	0.95754	0.96855	1	1
