# Supplementary material for: Robust perisomatic GABAergic self-innervation inhibits basket cells in the human and mouse supragranular neocortex
Source: eLife. 2020 Jan 9;9:e51691. doi: 10.7554/eLife.51691 (PMC6984819; doi:10.7554/eLife.51691)
Supplement: Figure 4—source data 1. [file elife-51691-fig4-data1.xlsx]

## Sheet: Fig 4Aii-iii
	cell 1	cell 2	cell 3	cell 4	cell 5	cell 6	cell 7			cell 1	cell 2	cell 3	cell 4	cell 5	cell 6	cell 7
test	0.828369	0.993017	0.99552	0.893873	0.960855	1.03981	1.00861		refs	0.927189	1.2172	0.965923	0.933896	0.992926	0.994347	1.11329
bin 3	0.835375	0.98202	1.02254	0.970104	0.992606	0.967589	0.958451			0.970233	0.808519	0.993278	1.14438	0.935308	1.0242	1.02187
bl norm (30 first)	0.981368	1.24442	0.993311	1.07848	0.967907	0.960904	1.11019			1.15283	1.55654	1.0461	0.962928	0.94107	0.967586	0.969635
	1.15128	0.903467	0.997725	1.05904	0.973792	0.975615	0.946455			1.22706	0.887446	0.999881	0.948412	1.06014	0.927441	1.20144
	1.08111	0.969457	1.02089	1.0127	1.05259	0.988988	1.13952			1.04759	0.909579	1.07346	0.868577	1.12064	1.01288	1.14266
	1.10572	0.961595	1.04185	0.991777	1.02671	0.967591	1.00942			0.89692	0.756876	0.969698	1.48552	1.00925	1.04067	1.04146
	0.971541	1.04959	1.03137	1.03662	1.05259	1.02576	0.895615			1.1372	1.04901	1.06591	1.35488	1.0563	0.928473	0.943521
	0.841991	0.909748	1.01179	1.00523	0.909106	0.984976	0.955419			0.919351	0.969332	0.894238	0.834693	1.08511	1.02626	1.29286
	1.091	0.996163	1.08707	0.997011	0.976143	0.967589	0.88078			1.11243	1.2349	1.02629	1.00163	0.992923	1.0242	0.982697
	1.16835	0.949027	1.06225	0.990283	0.992606	0.947529	1.09553			1.16727	1.21498	1.04327	0.880667	0.90074	0.978909	1.02351
	0.990487	1.05587	1.09783	0.94731	0.997311	0.653308	0.391504			0.924646	0.871954	1.0961	1.20488	0.93051	0.963471	1.18511
	1.12026	0.975741	1.07328	1.05456	0.978497	0.9482	0.744701			0.897495	1.09474	1.01214	0.752441	1.00061	0.997436	1.08716
	0.904201	0.927032	1.04736	1.07997	1.05024	0.984308	0.541979			1.0351	1.02097	1.11968	0.866159	1.01213	0.707162	1.28306
	0.787827	0.927032	1.09645	1.01121	1.01613	0.972269	1.0748			0.9969	1.20245	1.04327	0.977444	0.9718	0.97479	1.08716
	1.05112	1.09986	1.07604	1.06502	1.01848	0.912758	0.621147			1.07563	0.989985	1.01215	0.885511	1.00445	0.979937	1.35488
	1.20722	1.01031	1.11189	1.07847	1.05141	0.916767	0.729608			1.06255	1.13163	1.10553	0.793563	1.05342	1.07773	1.17533
	1.14125	1.03387	1.07108	1.11734	1.0373	0.944856	1.02358			1.15345	0.944255	1.08242	0.679853	1.02749	0.970675	1.00229
	1.37573	1.22242	1.1152	1.1278	0.992606	1.0144	1.03641			1.22495	1.19949	0.97347	0.851643	1.0323	0.974794	1.08423
	1.35717	1.0433	1.11024	1.0695	1.05847	1.13476	1.09457			1.02098	1.00622	1.08478	0.958092	1.0419	0.934649	1.02187
	1.37278	1.11086	1.10803	1.0867	1.06082	1.14078	0.966409			0.960657	0.91327	1.04233	0.897609	0.991964	0.99744	1.17859
	1.18828	1.11086	1.13781	1.09043	1.00672	1.20163	0.776243			1.15659	1.34114	1.07912	1.62343	1.0467	1.03861	1.00555
	1.09752	1.01345	1.03523	1.07548	1.04318	1.15215	0.74836			1.13895	1.03867	1.08289	1.25204	0.9718	1.01288	1.14267
	1.27315	1.21771	1.1163	1.07698	1.042	1.1381	0.69309			0.955018	1.00253	1.02441	1.04519	1.01597	1.03346	1.22104
	1.34729	1.34969	1.11024	1.09865	1.06082	1.13275	NA			0.940137	1.23933	1.0329	1.00165	0.955475	0.999497	1.12635
	1.14852	1.29784	1.07659	1.15695	1.04906	1.13075	0.849419			0.932345	0.824744	1.14609	0.849217	0.977561	0.948029	0.558275
	1.11357	1.25385	1.16649	1.09866	1.05377	1.16953	0.855623			0.967172	0.858678	1.11402	1.10567	0.914182	0.919207	1.20144
	1.09497	1.11558	1.15767	1.14424	1.13727	1.1575	1.0128			1.04769	0.821055	1.09987	0.829857	0.956435	0.995379	0.865169
	1.2437	1.224	1.16319	1.18087	1.06788	1.14145	0.655346			1.08959	0.911795	1.04422	0.837119	0.970837	1.0664	1.05451
	1.03914	1.32612	1.20069	1.18684	1.11845	1.11804	0.965571			0.966516	0.854254	1.09232	0.890347	0.953553	0.974794	1.27325
	1.06987	1.25699	1.15491	1.13378	1.08787	1.11671	1.24048			1.07185	0.895561	1.1093	0.846799	0.948754	0.923326	1.17206
	0.974784	1.35283	1.15877	1.1009	1.14079	1.1575	0.899338			1.22616	0.892612	1.03762	0.999214	0.965076	0.917146	0.982697
	1.05147	1.20985	1.18359	1.16667	1.09728	1.18826	1.14633			1.0535	0.858678	1.02252	1.08874	0.945872	0.95009	1.19164
	1.36919	1.30098	1.11189	1.10874	1.0914	1.17154	1.31647			1.04114	0.925071	1.00648	1.1589	0.954512	1.02317	1.09369
	1.22959	1.34184	1.15326	1.19357	1.1596	1.1916	1.10371			1.10664	1.02539	1.0678	1.096	0.977561	1.0767	0.754166
	0.777874	1.24599	1.13395	1.13677	1.15138	1.11604	1.34361			1.12202	1.19802	1.16779	0.870995	0.925705	0.960378	1.00229
	0.766247	1.08258	1.15546	1.24215	1.08081	1.1595	1.03815			1.29096	1.16113	1.05931	0.895183	1.01309	0.925383	1.01534
	1.13174	1.10144	1.1323	1.14649	1.19254	1.19026	1.32127			1.29811	1.00474	1.03101	0.909692	0.925708	0.918178	1.11656
	1.1202	1.03702	1.13947	1.07959	1.1161	1.16552	1.07921			1.06132	1.15965	1.14609	0.887929	1.00541	0.941853	1.04799
	1.12363	1.25699	1.18966	1.12556	1.13021	1.14212	1.29413			0.96556	1.17441	1.14515	0.798407	1.0467	1.04993	0.897808
	0.982644	1.32455	1.17311	1.09641	1.14197	1.07391	1.28986			0.965768	1.29687	1.14232	0.844373	0.956435	1.02111	1.08718
	0.88693	1.32456	1.17366	1.09791	1.06905	1.08528	1.33833			1.04631	1.10212	1.05648	0.737925	1.00349	0.957291	NA
	0.944662	1.27428	1.14885	1.16966	1.1161	1.1254	1.30297			1.27637	NA	1.08242	0.856467	1.03806	0.924354	1.35814
	0.932316	1.21928	1.12127	1.15695	1.12315	1.11871	1.44481			1.33342	0.963429	1.02064	0.868569	1.04766	0.981998	1.03167
	0.878485	1.28841	1.15215	1.19955	1.0961	1.12473	0.997506			1.20377	1.01802	1.06497	1.18309	0.981403	1.06126	1.1492
	1.06163	NA	1.17063	1.10202	1.11845	0.785038	1.10598			1.17065	1.0431	1.19137	1.14922	1.03998	1.06434	NA
	0.992575	1.27899	1.18194	1.17339	1.15255	1.18358	1.2256			1.15139	1.0018	1.14421	0.96051	1.01501	1.05817	1.26673
	1.10442	1.07473	1.17035	1.15097	1.11257	1.14747	1.29434			1.21893	1.18916	1.05836	0.854053	NA	0.707159	0.721516
	1.15799	1.22714	1.15326	1.13677	1.11727	1.10735	1.03169			1.27357	1.01212	1.08289	1.01616	1.01885	1.03141	0.976171
	1.06642	1.10144	1.19407	1.13079	1.1255	1.13342	1.37351			1.31809	1.03278	1.0678	1.2968	0.975639	1.04479	0.959835
	1.06458	1.26799	1.22496	1.20553	NA	1.20497	1.44807			1.25708	1.06818	1.1244	1.06334	1.00061	1.00464	0.927196
	1.15578	1.23814	1.17697	1.22272	1.13609	1.19628	1.27808			1.06815	1.0431	1.14892	0.918163	1.06206	0.937735	0.871695
	1.0842	1.19257	1.20565	1.12556	1.10551	1.14011	1.26724			1.0472	1.06376	1.11496	0.880659	1.01885	0.97479	1.11329
	1.07342	1.22557	1.1516	1.09865	1.07141	1.12941	1.20128			1.14431	1.18326	1.01874	0.983497	1.04574	1.06228	1.33529
	0.919758	1.21142	1.15491	1.16442	1.15373	1.15482	1.44622			1.00651	1.05786	1.12345	1.14923	0.991967	1.02214	1.10349
	0.753056	1.21928	1.22606	1.17489	1.16667	1.11203	1.28376			1.05941	1.05933	1.11119	1.12019	1.07743	0.973761	0.940247
	0.692755	1.10772	1.16263	1.17414	1.11021	1.07458	1.55302			1.06709	1.15523	1.06686	0.994378	1.01405	1.06846	0.950047
	0.839016	1.34184	1.14774	1.1577	1.17843	1.07057	1.28548			1.07406	1.19802	1.16119	0.890347	1.06303	1.05199	0.946784
	1.02236	1.18157	1.15657	1.13827	1.16784	1.09665	1.3332			1.00143	1.01803	1.06214	0.967764	1.00157	1.03243	0.82273
	1.08487	1.14229	1.17477	1.13004	1.17608	1.08327	1.58144			1.03587	1.07556	1.05836	1.17584	1.0371	1.02317	0.767218
	0.924472	1.16429	1.1698	1.11958	1.21253	1.14145	1.17484				1.08884	1.18382	0.979862	1.08895	1.08699	1.13288

## Sheet: Fig 4Bii-iii
	cell 1	cell 2	cell 3	cell 4	cell 5	cell 6	cell 7	cell 8			cell 1	cell 2	cell 3	cell 4	cell 5	cell 6	cell 7	cell 8
tests	0.950614	0.889774	0.869766	1.57406	0.988772	1.04974	0.782455	0.977474		refs	0.976188	0.981979	1.03281	1.12032	0.949002	1.10126	1.13572	1.06599
bin 3	0.944645	1.01531	1.07395	1.28628	0.963024	1.06302	0.75067	0.962562			1.00028	1.00295	1.01013	0.961865	0.884591	0.941159	1.04886	1.01147
blnorm (30 first)	1.02956	1.04795	1.05629	1.23831	0.926979	1.0232	0.709102	0.978271			1.07215	1.47329	1.03581	0.755753	0.966182	0.952599	0.833036	0.887384
	0.957913	1.01932	0.95418	0.736873	1.04542	1.08594	0.687092	0.983279			0.963947	1.00963	1.05636	0.921011	1.08642	1.14015	0.802768	0.812182
	1.02956	1.02184	0.910992	0.662749	0.982334	1.00872	0.975633	0.991255			1.05398	0.995644	1.0585	1.12527	1.14009	0.994906	0.856724	1.02839
	1.09391	1.07757	0.777484	0.858976	0.986202	0.967694	1.09789	1.04356			0.936501	0.988175	1.0418	1.14569	1.2818	1.02922	0.931739	1.15905
	0.930715	1.04744	0.846207	1.34296	1.03126	1.01596	1.25438	1.02798			0.972239	0.98452	1.0906	1.02128	0.961884	0.89313	0.900153	1.04155
	1.08362	0.940489	0.797119	1.18162	1.02998	1.01355	1.22993	1.03119			1.0836	0.999456	1.08632	0.94701	0.966182	0.961746	0.835667	1.02651
	0.993735	0.88927	0.940445	0.505784	1.05186	0.907363	1.093	0.978308			0.958418	1.02488	1.06149	0.828166	0.903918	1.11498	0.848832	1.25964
	1.0876	1.0364	0.912961	0.549376	1.0171	0.908573	1.33262	1.00643			1.0911	1.03918	1.04865	0.753893	1.12292	0.973183	0.840932	1.12051
	1.01596	0.933962	0.728409	0.359707	0.965602	0.914002	1.40842	0.980924			1.04806	1.02742	1.09274	0.716756	1.17445	1.07382	0.856724	0.870467
	1.00236	0.959571	0.79515	0.558106	1.06345	0.918224	1.18347	0.908644			1.0216	1.04967	1.07433	0.734085	1.23456	1.09554	0.86857	0.868582
	0.925409	0.960073	0.973822	0.693282	0.977191	0.895296	1.03675	1.0009			1.11598	1.03441	1.05636	0.656097	0.976919	0.978897	0.873831	1.12615
	1.02359	0.978652	1.00916	0.592982	1.01324	0.795147	1.1639	0.980775			0.954469	1.03473	1.09103	0.840546	0.931828	1.07038	0.892257	1.03027
	1.02757	0.987187	0.914923	1.08134	1.03641	0.821696	1.12233	0.982259			1.10058	1.03187	1.07134	1.13084	1.03274	1.01778	0.908049	1.00019
	NA	0.98016	1.02095	1.39092	0.938564	0.80239	0.965842	0.944607			1.07965	0.98166	1.0418	1.05966	1.30972	0.976611	1.17257	1.20699
	1.05742	1.01029	0.90903	1.4258	0.892212	0.900124	0.980521	1.00283			0.976187	0.951788	1.02896	1.20573	1.3183	1.09783	1.13309	1.01146
	1.01297	0.977647	1.13482	1.1642	0.901228	0.798768	1.05632	1.00392			1.11401	0.956237	1.04309	1.17974	1.27107	0.932015	0.942263	0.894906
	1.0614	0.979656	1.09163	0.928743	0.982342	0.904951	1.18836	0.95633			1.00146	0.935262	1.01141	1.22801	1.21525	1.11613	0.8791	1.09043
	0.951279	1.0128	0.877622	0.466536	1.01581	0.991824	0.861934	0.939711			1.10927	0.925729	0.975461	1.21069	0.961891	1.00635	1.1673	0.930625
	NA	1.04544	0.861905	0.353177	0.986202	0.989412	0.758009	1.00029			1.05556	0.931767	1.02982	1.06956	1.06066	1.06238	1.12914	0.964465
	1.04282	1.05246	0.928665	0.63223	0.869043	0.995446	1.19325	0.942289			1.06504	0.959415	1.02939	0.839309	1.20021	1.05781	0.969905	1.17127
	0.988095	1.02434	0.995413	1.02028	0.926979	1.05819	1.19325	1.01381			1.14145	0.933991	1.08118	1.0609	1.34836	0.981187	1.06597	1.12051
	1.07367	1.05297	1.02684	0.797939	0.960451	0.935115	0.863148	1.00782			NA	0.973715	1.1257	1.09432	1.09716	1.05437	1.04623	0.810297
	1.08462	1.01932	1.20157	0.845889	0.955304	0.89409	0.748226	0.964639			0.936499	1.05348	1.07647	0.91606	1.01127	1.06581	1.14625	0.979509
	NA	1.03991	1.06217	1.10751	0.876767	0.903742	0.98786	1.02755			1.15626	1.0789	1.11671	0.985384	0.966175	1.05094	1.16336	1.25964
	1.06604	1.02183	1.17605	1.14239	0.978474	1.07026	0.982964	0.992349			1.01686	1.07509	1.14325	1.05223	1.16371	0.953738	1.04886	1.09983
	1.32144	1.02485	1.15249	0.763034	0.840714	1.04492	1.14924	0.954642			1.03937	1.08113	1.13211	1.08565	1.18948	0.992623	0.96859	0.866703
	1.10187	1.01882	0.99935	0.662763	0.883201	1.04854	1.16635	0.933887			1.04885	1.09003	1.07348	0.917297	1.12721	0.960599	0.923841	1.01334
	1.18346	1.00175	0.964004	0.575551	0.869043	1.08594	0.870479	0.990123			0.959209	1.04554	1.06577	0.980431	1.00054	0.974326	1.14888	1.12615
	1.05775	0.999741	0.844245	0.784851	0.914103	0.97493	0.882706	0.983038			1.05082	1.01853	1.14924	1.0448	1.04563	0.992623	1.02518	0.992668
	1.20701	1.0128	0.903143	0.841545	0.852307	1.13541	0.677309	0.951489			1.11124	1.02774	0.739193	0.7737	1.00484	1.05438	0.996227	0.949427
	1.05974	0.917893	1.01702	0.479624	0.926979	1.34295	0.814248	0.931828			0.991588	0.989924	0.732772	1.04357	0.994092	1.00635	1.07913	1.02463
	1.20535	0.958065	1.05039	0.880765	0.993927	1.1523	1.00863	1.00457			0.970264	0.984521	1.14496	1.28991	1.2453	1.07267	0.994908	1.15247
	1.10319	0.979154	0.8462	0.898224	0.9347	1.08474	0.753114	0.993907			1.11677	0.995644	1.0632	0.818264	1.21953	0.974326	1.07387	1.02274
	1.05775	1.03238	0.857987	0.558106	0.921828	1.06422	1.0881	0.924057			1.12507	1.00359	1.12955	1.07575	1.16586	1.02922	1.04755	0.971993
	1.13238	1.04995	0.693063	1.01594	0.798231	1.0594	0.792238	0.968033			0.988826	0.984203	1.08803	1.1785	1.14654	1.05437	1.10677	0.898664
	1.275	1.00476	0.589008	0.488353	0.896077	1.0968	1.16146	0.998729			1.12704	1.05602	1.12184	0.893778	1.17445	0.975468	1.0607	0.902422
	1.20668	1.05749	1.00917	0.627873	0.933417	1.04009	0.733556	0.984726			1.08913	1.08923	1.08974	1.0807	1.06709	0.912569	0.95148	0.394814
	1.11513	1.0148	1.21925	0.915655	0.974609	0.965278	1.16391	1.01225			0.990996	0.986745	1.17107	0.969288	1.13687	0.916003	0.968585	1.10735
	1.14565	1.00978	0.773566	0.283425	0.974613	1.05095	0.846025	1.02423			1.07926	1.0592	1.05721	0.800931	1.27536	1.07268	0.922525	0.891142
	1.14101	0.948524	1.14463	0.510142	1.04543	1.01716	1.10767	0.985004			1.03384	1.12467	1.10644	1.16241	1.18948	0.950313	1.17388	0.904301
	1.04482	1.05347	0.928665	0.802297	1.02611	1.12214	0.716441	1.00526			1.15705	1.09988	1.14624	1.28249	1.13795	1.07724	1.11993	1.09607
	1.2299	0.943753	1.02094	0.405485	0.917964	1.06423	1.10033	0.947204			1.07768	1.03791	1.12141	0.994049	1.31831	0.834811	1.19363	1.15435
	1.0886	1.01782	0.991495	1.10751	0.982979	1.10162	0.740887	0.967235			1.00936	1.06937	1.07861	0.871496	1.21525	1.09897	1.17849	0.998311
	1.11447	0.899817	1.07003	0.924371	0.969466	1.0594	1.07344	0.972392			1.09979	1.14723	1.13768	1.24287	1.17659	0.973179	1.21073	0.924988
	1.10783	0.97112	0.793195	0.553748	1.10851	1.02923	0.931613	1.00125			1.14086	1.03696	1.0585	0.890062	1.37842	1.09211	1.17521	0.900549
	1.23785	0.95706	0.89725	1.00285	0.902514	1.11852	0.850921	1.0136			1.00936	1.1091	1.10986	0.959391	1.22383	1.09325	1.43182	0.894906
	1.2299	1.02083	1.28207	1.48249	1.02096	1.22591	0.726224	0.979903			1.03384	1.12054	1.06064	1.30601	1.19592	0.978897	1.17784	0.998311
	1.18214	0.931451	0.975784	0.950532	1.04028	1.08956	0.726216	0.992256			1.16613	1.03823	1.22157	1.10298	1.36339	1.11041	1.12782	1.12615
	1.11148	0.994218	0.99935	0.98105	1.01195	0.999063	0.860704	1.00086			1.06978	1.14183		1.09556	1.1401	0.964036	1.11203	1.24271
	1.27766	1.01455	1.0288	1.4171	1.0995	1.04612	0.914499	1.03058			1.03424	1.08081		1.25277	1.33548	1.04294	1.0765	1.23519
	1.11546	0.949027	0.981677	0.837173	0.961738	0.927872	0.555056	1.00424			1.19615	1.04522		1.13765	1.26248	1.16759	0.940948	1.11298
	1.1085	0.999239	1.17605	0.876407	0.926975	0.910981	0.821579	0.958073			1.11559	1.11958		0.850452	1.37628	1.03608	0.965955	0.891142
	1.19607	0.995725	1.16035	1.29935	1.14971	1.02923	0.594181	0.945201			1.05912	1.08876		1.15993	1.27751	0.997195	0.962005	1.03027
	1.21298	0.956055		1.40401	1.00036	0.86875	0.735999	0.96909			1.03305	1.04458		1.16612	1.21095	1.14701	0.969905	1.20135
	1.12143	1.0133		1.14239	0.973322	1.00751	0.860704	0.960633			1.17324	1.06397		0.913586	1.40848	0.904567	0.944898	1.16187
	1.13835	0.961578		1.35167	1.12396	0.302856	0.936509	0.973375			1.11124	1.14882		0.921009	1.29683	1.00406	0.937002	1.22204
	1.2299	0.963085		1.2165	1.1304	0.682934	0.77268	0.952026			1.07254	1.1377		1.06585	1.32474	1.00863	0.968585	1.22955
	1.17716	1.01882		0.610427	1.10208	0.796357	0.804465	0.994686			1.02595	1.06079		1.26887	1.41277	0.88055	1.11335	1.07539
