# Supplementary material for: Robust perisomatic GABAergic self-innervation inhibits basket cells in the human and mouse supragranular neocortex
Source: eLife. 2020 Jan 9;9:e51691. doi: 10.7554/eLife.51691 (PMC6984819; doi:10.7554/eLife.51691)
Supplement: Figure 5—source data 1. [file elife-51691-fig5-data1.xlsx]

## Sheet: Fig 5B
fig5bii raw data	2nd spike delay (ms)	cycle in y-axis	autapse d-clamp (nS)	Vm (mV)			pie charts
	5.8	1	0	-76.7207			spike failure n	4	18	8	1
	6.04	2	0	-76.1409			spike evoked n	27	34	37	28
	5.86	3	0	-76.5833
	6.3	4	0	-75.8815
		5	0	-75.912
		6	0	-76.3545
	5.92	7	0	-76.5224
	5.9	8	0	-76.9648
	6.26	9	0	-77.0564
	5.72	10	0	-77.0412
	5.52	11	0	-76.8123
	5.12	12	0	-76.0798
	6.1	13	0	-76.5681
	5.8	14	0	-76.3545
	5.68	15	0	-76.5224
	6.7	16	0	-76.7512
	5.44	17	0	-76.5071
	5.82	18	0	-76.6444
	5.74	19	0	-76.7207
	5.32	20	0	-76.4613
	6.14	21	0	-76.4918
	5.36	22	0	-76.1561
	5.3	23	0	-76.1714
	5.88	24	0	-76.3697
	5.84	25	0	-76.4918
		26	0	-76.6596
	7.06	27	0	-76.5833
	6.4	28	0	-76.7818
	7.08	29	0	-76.5833
		30	0	-76.4155
	6.84	31	0	-76.4155
	5.94	32	10	-76.4918
	7	33	10	-76.5224
	7.74	34	10	-76.5071
		35	10	-76.8733
	7.9	36	10	-76.4766
	8.6	37	10	-76.797
	8.46	38	10	-76.4613
		39	10	-75.9425
		40	10	-76.5529
	6.7	41	10	-76.5987
	8.06	42	10	-76.5376
		43	10	-76.4155
		44	10	-76.8123
		45	10	-76.9038
		46	10	-76.7512
		47	10	-76.7054
	7.18	48	10	-76.3697
	7.74	49	10	-76.3697
	8.44	50	10	-76.3087
		51	10	-76.1409
		52	10	-76.4308
		53	10	-76.385
		54	10	-76.4766
	8	55	10	-76.8733
	6.86	56	10	-76.5224
		57	10	-76.7054
	6.74	58	10	-76.446
	6.78	59	10	-75.8815
		60	10	-75.912
	7.54	61	10	-76.1714
	7.26	62	10	-76.0036
	7.14	63	10	-76.263
	6.52	64	10	-76.6291
		65	10	-76.4613
	7.14	66	10	-76.7512
	7.18	67	10	-76.797
	7.34	68	10	-76.1714
	6.94	69	10	-76.1561
		70	10	-75.9578
	7	71	10	-76.1714
	7.22	72	10	-76.2782
	8.4	73	10	-76.4155
	7	74	10	-76.5071
	6.72	75	10	-76.4766
		76	10	-76.5376
	7.14	77	10	-76.4155
		78	10	-76.2477
	6.6	79	10	-76.3239
	7.38	80	10	-76.4308
	5.94	81	10	-76.4613
	6.82	82	10	-76.6291
	6.52	83	10	-76.5987
	6.62	84	5	-76.5071
	6.72	85	5	-76.6444
		86	5	-77.1021
	6.54	87	5	-76.8427
	7.98	88	5	-75.7899
	6.64	89	5	-76.7054
	6.02	90	5	-76.7207
	7.44	91	5	-76.5833
	6.84	92	5	-76.9343
		93	5	-76.7665
	6.18	94	5	-76.5376
	6.64	95	5	-76.9038
	6.72	96	5	-76.5376
	6.24	97	5	-76.6291
	6.28	98	5	-76.5071
	7.32	99	5	-76.5071
	7.2	100	5	-76.8275
	6.92	101	5	-76.797
	6.6	102	5	-76.8123
	9.6	103	5	-76.5833
	7.38	104	5	-76.385
		105	5	-76.4308
	8.78	106	5	-76.4002
	7.26	107	5	-76.3239
	6.46	108	5	-76.5987
		109	5	-76.8581
	7.74	110	5	-76.736
	7.42	111	5	-76.6749
		112	5	-76.6902
	6.58	113	5	-76.1409
		114	5	-76.8275
	7.46	115	5	-76.9801
	6.38	116	5	-77.0259
	6.72	117	5	-76.6444
		118	5	-76.7665
	7.12	119	5	-76.736
	6.92	120	5	-76.8581
	6.3	121	5	-76.919
	7.8	122	5	-76.736
		123	5	-77.0412
	7	124	5	-76.3239
	6.66	125	5	-76.8733
	6.42	126	5	-76.919
	6.54	127	5	-76.7665
	6.24	128	5	-76.6444
		129	0	-76.3697
	6.7	130	0	-77.0717
	6.12	131	0	-77.1327
	6.5	132	0	-76.3545
	6.14	133	0	-76.6749
	5.72	134	0	-76.4766
	5.76	135	0	-76.1561
	6.12	136	0	-76.0493
	5.66	137	0	-76.4155
	6.5	138	0	-76.446
	7.32	139	0	-76.3239
	5.86	140	0	-75.1338
	6.2	141	0	-76.6444
	5.88	142	0	-76.6444
	6.56	143	0	-76.263
	6.66	144	0	-76.3697
	6	145	0	-76.7665
	6.64	146	0	-76.4918
	6.26	147	0	-76.5987
	6.92	148	0	-76.7665
	5.88	149	0	-76.4613
	6.94	150	0	-76.5681
	6.04	151	0	-76.6596
	6.34	152	0	-76.5987
	6.62	153	0	-76.5987
	6.16	154	0	-76.5224
	6.52	155	0	-76.0493
	6.54	156	0	-76.7054
	6.02	157	0	-76.8123

## Sheet: Fig 5C
fig5c raw data	2nd spike delay (ms)	cycle in y-axis	autapse d-clamp (nS)	Vm (mV)		pie charts
	6.2	1	0	-74.8591		spike failure n	9	46	45	76	23	30
	6.64	2	0	-74.7981		spike evoked n	27	0	20	1	16	5
	5.58	3	0	-74.3404
	6.98	4	0	-74.2488
	6.28	5	0	-73.791
		6	0	-74.2946
	7.1	7	0	-74.0962
	6.06	8	0	-74.3861
		9	0	-74.1573
	6.34	10	0	-73.9436
	5.76	11	0	-74.3861
	5.74	12	0	-74.4929
		13	0	-74.5082
		14	0	-74.8133
	6.26	15	0	-74.4624
	6.62	16	0	-74.4471
	6.9	17	0	-74.7065
	6.28	18	0	-74.4776
	6.28	19	0	-74.9202
	6.64	20	0	-74.5845
	6.72	21	0	-74.7676
	6.16	22	0	-74.7218
		23	0	-74.7065
	5.88	24	0	-74.1573
	6.48	25	0	-74.5234
	6.7	26	0	-74.7065
	6.34	27	0	-74.5692
	6.18	28	0	-74.1267
	5.96	29	0	-75.0117
	7.26	30	0	-75.4542
	6.84	31	0	-75.3779
		32	0	-75.2711
		33	0	-74.8286
		34	0	-74.8286
		35	0	-74.6913
	6.7	36	0	-74.9049
		37	5	-74.6607
		38	5	-74.8439
		39	5	-74.5998
		40	5	-74.5692
		41	5	-75.4848
		42	5	-75.4237
		43	5	-75.3474
		44	5	-75.4237
		45	5	-74.9202
		46	5	-74.6303
		47	5	-74.9507
		48	5	-75.3016
		49	5	-75.6679
		50	5	-75.2406
		51	5	-75.1338
		52	5	-75.2406
		53	5	-75.3016
		54	5	-74.5845
		55	5	-74.9964
		56	5	-75.088
		57	5	-74.8744
		58	5	-74.9507
		59	5	-74.8744
		60	5	-74.8744
		61	5	-74.9202
		62	5	-74.8897
		63	5	-75.1643
		64	5	-75.2711
		65	5	-75.1491
		66	5	-75.027
		67	5	-75.6679
		68	5	-75.3932
		69	5	-74.9964
		70	5	-74.8744
		71	5	-74.7523
		72	5	-74.9202
		73	5	-75.0422
		74	5	-74.7828
		75	5	-74.8591
		76	5	-74.3404
		77	5	-74.9202
		78	5	-74.8133
		79	5	-75.3321
		80	5	-75.3169
		81	5	-75.3932
		82	5	-75.8967
		83	0	-74.9202
		84	0	-75.3779
		85	0	-75.1796
		86	0	-74.9812
	6.28	87	0	-74.9354
	6.04	88	0	-74.9202
	6.42	89	0	-74.5998
		90	0	-75.2406
	5.92	91	0	-75.8509
		92	0	-75.9883
		93	0	-75.1643
		94	0	-75.439
	6.78	95	0	-75.0575
	6.04	96	0	-75.1185
		97	0	-75.3474
		98	0	-75.6373
		99	0	-75.5458
		100	0	-75.5
		101	0	-75.3016
	6.46	102	0	-75.1185
	5.76	103	0	-73.9588
		104	0	-75.3016
		105	0	-75.5458
	6.44	106	0	-75.5152
	6.62	107	0	-75.6679
		108	0	-75.561
	6.98	109	0	-75.3321
		110	0	-75.4237
		111	0	-75.4542
	6.16	112	0	-75.6526
		113	0	-75.3779
		114	0	-75.4848
	6.88	115	0	-75.7289
		116	0	-75.3321
		117	0	-75.439
		118	0	-75.561
	5.84	119	0	-75.5915
		120	0	-75.7442
		121	0	-75.6831
		122	0	-75.6373
		123	0	-75.439
	6.78	124	0	-75.5915
		125	0	-75.6221
	6.54	126	0	-75.2711
		127	0	-75.2406
		128	0	-75.1491
		129	0	-75.027
		130	0	-74.7065
		131	0	-75.0727
		132	0	-75.2711
		133	0	-75.2711
		134	0	-75.3016
	6.7	135	0	-75.5915
		136	0	-75.5763
		137	0	-75.5458
		138	0	-75.5763
		139	0	-75.4237
		140	0	-75.439
		141	0	-75.1185
		142	0	-75.6221
		143	0	-75.3169
		144	0	-75.2101
		145	0	-75.027
	6.62	146	0	-75.6068
	6.38	147	0	-75.5763
	7.72	148	0	-76.1561
		149	2.5	-75.439
		150	2.5	-74.9049
		151	2.5	-74.8591
		152	2.5	-74.7828
		153	2.5	-75.4542
		154	2.5	-75.5763
		155	2.5	-75.5763
		156	2.5	-75.9883
		157	2.5	-75.5
		158	2.5	-75.5152
		159	2.5	-75.9273
		160	2.5	-75.7746
		161	2.5	-75.2711
		162	2.5	-75.7136
		163	2.5	-75.6068
		164	2.5	-75.7594
		165	2.5	-75.8662
		166	2.5	-75.561
		167	2.5	-75.6068
		168	2.5	-75.088
		169	2.5	-75.2711
		170	2.5	-75.4237
		171	2.5	-75.6068
		172	2.5	-75.8662
		173	2.5	-76.0798
		174	2.5	-75.8815
		175	2.5	-75.3779
		176	2.5	-75.1643
		177	2.5	-75.3321
		178	2.5	-75.2864
		179	2.5	-75.3779
		180	2.5	-75.439
		181	2.5	-75.7746
		182	2.5	-75.6068
	7.24	183	2.5	-75.3169
		184	2.5	-75.3169
		185	2.5	-75.1338
		186	2.5	-75.5305
		187	2.5	-75.3627
		188	2.5	-75.2711
		189	2.5	-75.5305
		190	2.5	-75.6526
		191	2.5	-76.0646
		192	2.5	-75.7136
		193	2.5	-75.4848
		194	2.5	-76.0646
		195	2.5	-75.973
		196	2.5	-75.5305
		197	2.5	-75.561
		198	2.5	-75.4085
		199	2.5	-75.3932
		200	2.5	-75.2406
		201	2.5	-75.2254
		202	2.5	-75.2711
		203	2.5	-75.027
		204	2.5	-75.2558
		205	2.5	-75.5305
		206	2.5	-75.1338
		207	2.5	-75.3779
		208	2.5	-75.5763
		209	2.5	-75.7899
		210	2.5	-76.0036
		211	2.5	-76.0036
		212	2.5	-75.9425
		213	2.5	-75.6984
		214	2.5	-75.3779
		215	2.5	-75.7289
		216	2.5	-75.5152
		217	2.5	-75.3474
		218	2.5	-75.5763
		219	2.5	-75.3932
		220	2.5	-75.5305
		221	2.5	-75.8357
		222	2.5	-76.1561
		223	2.5	-75.8204
		224	2.5	-75.7594
		225	2.5	-76.1714
		226	0	-75.9425
	7.24	227	0	-76.0798
		228	0	-76.0951
		229	0	-75.8967
		230	0	-75.8509
	7.38	231	0	-75.5763
		232	0	-75.3016
		233	0	-73.3637
		234	0	-75.5915
	7.34	235	0	-75.561
		236	0	-75.8052
		237	0	-75.8052
		238	0	-72.6313
		239	0	-75.5763
		240	0	-75.3627
		241	0	-75.4542
	6.62	242	0	-75.4848
		243	0	-75.7746
		244	0	-75.2254
	6.4	245	0	-75.1033
		246	0	-75.7594
		247	0	-75.6679
	6.68	248	0	-75.9273
	6.44	249	0	-75.4542
	6.72	250	0	-75.5152
		251	0	-75.6526
	6.52	252	0	-75.1643
	6.28	253	0	-75.7442
		254	0	-75.973
		255	0	-75.8357
	6.76	256	0	-75.7899
	6.62	257	0	-75.1643
		258	0	-75.5
		259	0	-75.3779
	6.24	260	0	-75.1643
	6.02	261	0	-75.5458
		262	0	-76.0036
	6.68	263	0	-75.6221
	7.52	264	0	-75.5763
		265	1	-76.0798
		266	1	-75.6984
		267	1	-75.2406
		268	1	-75.4695
		269	1	-75.5458
		270	1	-75.6221
		271	1	-75.9883
		272	1	-75.8815
		273	1	-75.7289
		274	1	-75.9425
		275	1	-75.9273
	7.26	276	1	-76.2324
		277	1	-75.8815
	7.32	278	1	-76.0493
		279	1	-75.8204
		280	1	-74.9964
		281	1	-75.0117
	7.06	282	1	-75.1185
	6.88	283	1	-75.5152
		284	1	-75.5305
	5.96	285	1	-75.5152
		286	1	-75.6984
		287	1	-75.6068
		288	1	-75.6221
		289	1	-75.9883
		290	1	-76.2019
		291	1	-73.4706
		292	1	-75.4542
		293	1	-75.3016
		294	1	-75.4695
		295	1	-75.6221
		296	1	-75.2101
		297	1	-75.5915
		298	1	-75.9883
		299	1	-75.8815

## Sheet: Fig 5D
fig5d raw data	2nd spike delay (ms)	cycle in y-axis	autapse d-clamp (nS)	Vm (mV)		pie charts
	5.84	1	0	-74.1115		spike failure n	3	2	11	17	57	0
	5.62	2	0	-72.9671		spike evoked n	36	14	23	26	10	37
	5.3	3	0	-73.4248
	6.38	4	0	-73.2875
	5.58	5	0	-73.4553
	5.44	6	0	-72.7229
	5.68	7	0	-73.3637
	5.3	8	0	-66.6194
	5.44	9	0	-74.081
	5.82	10	0	-73.9894
	6.14	12	0	-73.7147
	6.7	13	0	-73.3637
	5.62	14	0	-73.3791
	5.72	15	0	-71.609
	5.46	16	0	-73.9436
	5.36	17	0	-73.73
	5.24	18	0	-73.6385
	5.92	19	0	-72.8144
	6	20	0	-73.318
	6.64	21	0	-72.8907
	5.3	22	0	-73.9588
	5.22	23	0	-74.203
	5.74	24	0	-73.3637
	5.88	25	0	-73.4553
	5.52	26	0	-72.8602
	5.9	27	0	-73.4553
		28	0	-73.3791
	5.56	29	0	-73.8521
	6.5	30	0	-73.3943
	5.82	31	0	-73.7758
	6.26	32	0	-73.4553
	5.1	33	0	-73.4248
	5.3	34	0	-72.2956
	5.88	35	0	-73.6689
	5.48	36	0	-74.2946
		37	0	-73.4706
	5.02	38	0	-73.5774
		39	0	-71.8379
	5.48	40	0	-72.9518
	5.32	41	1	-73.0586
	6.06	42	1	-73.3485
	5.28	43	1	-73.5011
		44	1	-73.4095
	6.06	45	1	-72.9213
	5.62	46	1	-73.3943
	5.6	47	1	-74.0657
	5.68	48	1	-73.5469
	5.22	49	1	-73.6994
	6.04	50	1	-73.1196
	5.96	51	1	-73.3028
	5.6	52	1	-73.791
		53	1	-73.1654
	5.2	54	1	-73.2875
	5.72	55	1	-73.7758
	5.86	56	1	-73.6842
	6.34	57	2.5	-73.1349
		58	2.5	-73.2417
		59	2.5	-72.4635
		60	2.5	-73.2112
	6.18	61	2.5	-73.3637
	5.98	62	2.5	-74.0352
	6.24	63	2.5	-73.0891
		64	2.5	-73.5469
	5.94	65	2.5	-71.5938
		66	2.5	-72.9976
	6.38	67	2.5	-72.9365
	5.32	68	2.5	-73.1196
	6.48	69	2.5	-73.5164
	5.38	70	2.5	-73.4095
		71	2.5	-73.4095
		72	2.5	-73.4095
	6.24	73	2.5	-72.4635
	5.74	74	2.5	-73.4095
	6.62	75	2.5	-72.3414
	5.62	76	2.5	-73.0281
	5.8	77	2.5	-73.2112
		78	2.5	-72.8602
		79	2.5	-73.5316
	7.24	80	2.5	-73.0434
	6.32	81	2.5	-72.1125
	6.14	82	2.5	-72.7992
	5.8	83	2.5	-73.0434
		84	2.5	-72.3719
	5.84	85	2.5	-72.906
	5.7	86	2.5	-73.8063
		87	2.5	-72.3719
	6.46	88	2.5	-73.1349
	5.94	89	2.5	-73.6537
	5.76	90	2.5	-72.8449
	5.8	91	5	-72.433
		92	5	-73.2722
		93	5	-72.8297
		94	5	-72.3719
	6.74	95	5	-72.8907
		96	5	-72.8449
	5.2	97	5	-73.5469
	5.54	98	5	-73.5927
	5.72	99	5	-72.9671
	5.46	100	5	-72.8602
		101	5	-73.3943
	5.6	102	5	-73.2722
		103	5	-72.2194
	5.8	104	5	-72.9823
		105	5	-72.6771
		106	5	-71.2886
	6.06	107	5	-73.3333
	5.92	108	5	-72.6313
		109	5	-72.0515
	5.78	110	5	-72.7687
		111	5	-72.5246
		112	5	-72.6771
	6.26	113	5	-72.8755
		114	5	-71.96
	7.98	115	5	-72.8602
	5.96	116	5	-72.9671
		117	5	-72.8602
	5.64	118	5	-72.5246
	5.58	119	5	-73.3943
		120	5	-72.7077
	6	121	5	-72.5398
		122	5	-72.7229
	6.06	123	5	-71.6548
		124	5	-72.5855
	6.8	125	5	-73.0128
	5.78	126	5	-72.1583
	6.3	127	5	-72.4483
		128	5	-72.9365
	5.84	129	5	-71.7616
	5.7	130	5	-72.0058
	6.22	131	5	-72.6924
	5.9	132	5	-72.2194
	5.94	133	5	-71.7921
	7.44	134	10	-72.5703
		135	10	-72.4483
		136	10	-72.4635
		137	10	-72.6008
	5.6	138	10	-72.3719
	7.02	139	10	-72.555
		140	10	-72.4483
		141	10	-72.5246
		142	10	-72.6619
		143	10	-68.6793
		144	10	-72.8144
	6.76	145	10	-72.4635
		146	10	-72.1736
	7.12	147	10	-71.0292
		148	10	-72.4483
		149	10	-72.3872
		150	10	-71.7158
		151	10	-65.7497
		152	10	-70.6172
		153	10	-72.7229
		154	10	-71.7464
		155	10	-71.1208
		156	10	-72.2346
		157	10	-72.6466
	7.44	158	10	-72.2804
		159	10	-71.8989
		160	10	-72.4025
		161	10	-72.2804
		162	10	-72.1736
		163	10	-71.9295
		164	10	-72.784
		165	10	-72.5855
		166	10	-72.6924
		167	10	-72.7077
		168	10	-71.6701
	7.06	169	10	-71.3496
		170	10	-72.1583
		171	10	-72.3414
		172	10	-72.082
		173	10	-72.3719
		174	10	-71.7158
		175	10	-71.7006
		176	10	-71.609
		177	10	-72.5246
	6.64	178	10	-71.4717
		179	10	-71.4564
		180	10	-71.6701
		181	10	-71.5174
		182	10	-70.8003
		183	10	-71.3649
	6.5	184	10	-71.6395
		185	10	-70.5104
		186	10	-71.2275
		187	10	-72.021
	7.14	188	10	-71.7158
		189	10	-71.136
		190	10	-72.0515
		191	10	-72.021
		192	10	-72.1889
		193	10	-71.96
		194	10	-71.5022
		195	10	-71.4564
		196	10	-71.5174
		197	10	-72.0973
		198	10	-69.8542
		199	10	-71.4869
		200	10	-71.5785
	5.46	201	0	-72.5246
	7.14	202	0	-70.3731
	5.64	203	0	-71.5022
	5.46	204	0	-68.2673
	5.58	205	0	-71.8531
	5.84	206	0	-72.1431
	5.72	207	0	-71.258
	5.14	208	0	-72.2804
	5.62	209	0	-69.7169
	5.88	210	0	-71.1513
	5.6	211	0	-71.4869
	5.54	212	0	-71.4869
	5.3	213	0	-71.9905
	4.82	214	0	-72.6466
	5.38	215	0	-72.5246
	5.42	216	0	-71.4869
	6.58	217	0	-71.3496
	5.6	218	0	-71.8531
	5.72	219	0	-71.197
	5.56	220	0	-71.8379
	5.58	221	0	-72.1889
	6.1	222	0	-72.6466
	6.12	223	0	-72.1278
	5.02	224	0	-72.2346
	5.46	225	0	-72.4177
	5.32	226	0	-71.7921
	5.28	227	0	-72.2956
	5.58	228	0	-71.7921
	5.3	229	0	-70.9986
	5.56	230	0	-71.4717
	6.26	231	0	-71.5785
	5.6	232	0	-72.433
	5.36	233	0	-71.9295
	5.56	234	0	-71.6395
	5.18	235	0	-71.7158
	5.18	236	0	-71.5938
	5.74	237	0	-71.3496
