# Supplementary material for: Robust perisomatic GABAergic self-innervation inhibits basket cells in the human and mouse supragranular neocortex
Source: eLife journal article supplement (doi:10.7554/elife.51691), 2020-01-09
Supplement: supp [file elife_poa_e51691_Supplementary_file_1.docx]

|  | **cell code** | **strept** | **immuno** | **acw**  **(ms)** | **firing freq. accomm.** | **Em (mV)** | **gender** | **age** | **hemisphere** | **neocortical area** | **diagnosed pathology** |
| --- | --- | --- | --- | --- | --- | --- | --- | --- | --- | --- | --- |
| **Fig 1 exp.** |  |  |  |  |  |  |  |  |  |  |  |
| GBZ | V041017_4 | strept | pv+, vGAT+ | 0.5 |  | -64 | female | 69 | right | occipital | subcortical neoplasia |
|  | V091117_1 | strept | pv+ | 0.5 | 160Hz / acc. 0.8 | -75 | female | 63 | right | temporal | hydrocephalus |
|  | V231117_2 | strept | pv+, vGAT+ | 0.7 |  | -73 | female | 68 | right | temporal | hydrocephalus |
|  | V071217_1 | strept | pv+ | 0.5 | 100Hz/acc. 1.1 | -70 | female | 76 | right | frontal | hydrocephalus |
|  | V130618_2 | NA |  | 0.5 |  | -63 | female | 35 | right | temporal | subcortical neoplasia |
|  |  |  |  |  |  |  |  |  |  |  |  |
| BAPTA | K190918_1 | NA |  | 0.4 | 170Hz/acc. 1.0 | -70 | male | 21 | right | temporo-occipital | subcortical cystic neoplasm |
|  | V190918_4 | strept | pv non concl. | 0.6 | 150Hz/acc. 0.8 | -70 | male | 21 | right | temporo-occipital | subcortical cystic neoplasm |
|  | V190918_5 | strept | pv non concl. | 0.5 |  | -73 | male | 21 | right | temporo-occipital | subcortical cystic neoplasm |
|  | V091018_1 | NA |  | 0.6 |  | -69 | female | 66 | left | frontal | cortical metaplasia |
|  | V171018_1 | NA |  | 0.6 | 150Hz/acc. 0.9 | -68 | male | 33 | right | frontal | hydrocephalus |
|  | V171018_2 | NA |  | 0.5 | 200Hz/Acc. 0.9 | -76 | male | 33 | right | frontal | hydrocephalus |
|  |  |  |  |  |  |  |  |  |  |  |  |
| no aut | V041017_3 | strept | pv+, vGAT+ | 0.7 |  | -68 | female | 69 | right | occipital | subcortical neoplasia |
|  | V121217_1 | strept | pv+ | 0.65 |  | -74 | female | 68 | right | temporal | hydrocephalus |
| **Fig 2 and 3 exp.** |  |  |  |  |  |  |  |  |  |  |  |
|  | K151217_2 | strept | pv+ | 0.65 |  | -71 | female | 19 | right | frontal | subcortical neoplasia |
|  | K080917_1 | NA |  | 0.5 | 170Hz/acc. 0.76 | -63 | male | 45 | right | fronto-temporal | subcortical neoplasia |
|  | K121217_1 | strept | pv+, vGAT+ | 0.5 | 150Hz/acc. 0.8 | -81 | female | 68 | right | temporal | hydrocephalus |
|  | K150218_1 | strept | pv non concl. | 0.7 | 250Hz/acc. 0.6 | -76 | female | 67 | right | occipital | subcortical neoplasia |
|  | K151217_3 | strept | pv+, vGAT+ | 0.6 |  | -80 | female | 19 | right | frontal | subcortical neoplasia |
|  | K150917_2 | strept | pv+ | 0.6 |  | -68 | female | 63 | right | occipital | subcortical neoplasia |
|  | K270218_1 | strept | pv non concl. | 0.65 | 190Hz/acc. 1 | -78 | male | 34 | left | frontal | subcortical neoplasia |
|  | K260118_1 | strept | pv+ | 0.6 | 300Hz/acc. 0.83 | -83 | female | 54 | right | frontal | hydrocephalus |
|  | K071217_1 | strept | pv+ | 0.6 |  | -68 | female | 76 | right | frontal | hydrocephalus |
|  | K280218_1 | strept | pv+ | 0.5 |  | -84 | female | 41 | right | frontal | hydrocephalus |
|  | K121217_3 | strept | pv+ | 0.5 |  | -73 | female | 68 | right | temporal | hydrocephalus |
|  | K231117_3 | strept | pv non concl. | 0.65 | 130Hz/acc. 0.76 | -78 | female | 68 | right | temporal | hydrocephalus |
|  | k260118_2 | strept | pv+ | 0.65 | 260Hz/acc. 0.7 | -75 | female | 54 | right | frontal | hydrocephalus |
|  | k200218_6 | strept | pv+ | 0.45 | 310/acc. 0.8 | -62 | female | 54 | right | frontal | aneurysm |
|  |  |  |  |  |  |  |  |  |  |  |  |
| no aut | K280218_1 | strept | pv+ | 0.35 |  | -63 | female | 41 | right | frontal | hydrocephalus |
|  | K250118_1 | strept | pv+ | 0.35 |  | -75 | female | 50 | left | occipital | astrocytoma |
|  | K250118_2 | strept | pv+ | 0.6 | 220Hz/acc. 0.77 | -77 | female | 50 | left | occipital | astrocytoma |
|  | K200218_3 | strept | pv+ | 0.6 | 180Hz/acc. 0.8 | -74 | male | 56 | right | occipital | hydrocephalus |
|  | K200218_4 | strept | pv+ | 0.45 | 220Hz/acc. 0.86 | -61 | female | 54 | right | frontal | aneurysm |
|  | K270218_2 | strept | pv non concl. | 0.55 | 170Hz/acc. 0.76 | -71 | male | 34 | left | frontal | subcortical neoplasia |
|  | K231117_2 | strept | pv+ | 0.5 | 270Hz/acc. 0.6 | -88 | female | 68 | right | temporal | hydrocephalus |
|  | V220818_2 | strept | pv non concl. | 0.5 | 160Hz/acc. 0.8 | -71 | female | 26 | right | frontal |  |
|  | K250118_3 | strept | pv+ | 0.5 | 290Hz/acc. 0.9 | -71 | female | 50 | left | occipital | astrocytoma |
| **Suppl. fig. 2 exp.** |  |  |  |  |  |  |  |  |  |  |  |
|  | K231117_2 | strept | pv+ | 0.5 |  | -88 | female | 68 | right | temporal | hydrocephalus |
|  | K150218_1 | strept | pv non concl. | 0.65 |  | -70 | female | 67 | right | occipital | subcortical neoplasia |
|  | K151217_3 | strept | pv+, vGAT+ | 0.6 |  | -81 | female | 19 | right | frontal | subcortical neoplasia |
|  | K151217_2 | strept | pv+ | 0.65 |  | -74 | female | 19 | right | frontal | subcortical neoplasia |
|  | K121217_1 | strept | pv+, vGAT+ | 0.5 |  | -79 | female | 68 | right | temporal | hydrocephalus |
|  | K080917_1 | NA |  | 0.5 |  | -63 | male | 45 | right | fronto-temporal | subcortical neoplasia |
|  | K040915_2 | strept | pv+ | 0.5 | 240Hz/acc. 0.7 | -78 | male | 55 | right | frontal | subcortical neoplasia |
|  | K050615_1 | strept | pv non concl.,vGAT+ | 0.5 |  | -73 | male | 68 | right | temporal | glioblastoma grade IV. |
|  | K100417_1 | strept | pv+, vGAT+ | 0.4 | 210Hz/acc. 0.76 | -70 | female | 39 | right | frontal | glioblastoma grade IV. |
|  | K140415_2 | strept | pv and vGAT non concl. | 0.4 | 340Hz/acc. 0.8 | -89 | male | 18 | right | frontal | malignant germinoma, grade II. |
|  | K190315_1 | strept | pv non concl. | 0.4 | 360Hz/aoo. 0.8 | -68 | male | 85 | left | fronto-temporal | hydrocephalus |
|  | K230615_1 | strept | pv+, vGAT+ | 0.4 | 270Hz/acc. 1 | -86 | female | 30 | no info | no info | hydrocephalus |
|  | K230915_1 | strept | pv+ | 0.5 | 330Hz/acc. 0.9 | -86 | female | 40 | right | frontal | anaplastic ependymoma |
|  | K230915_3 | strept | pv+, vGAT+ | 0.45 |  | -85 | female | 40 | right | frontal | anaplastic ependymoma |
|  | K250615_1 | strept | pv+ | 0.45 | 230Hz/acc. 1 | -93 | female | 10 | left | frontal | pilocytic astrocytoma |
|  | K250615_5 | strept | pv+ | 0.4 | 300Hz/acc. 0.9 | -85 | female | 10 | left | frontal | pilocytic astrocytoma |
|  | K260515_1 | strept | NA | 0.4 | 370Hz/acc. 0.8 | -83 | female | 31 | left | temporo-occipital | fibrillary astrocytoma |
|  | K280415_1 | strept | pv+, vGAT+ | 0.4 | 350Hz/acc. 0.8 | -84 | female | 28 | right | temporal | hydrocephalus |
|  | K280815_1 | strept | pv+ | 0.4 | 290Hz/acc. 0.8 | -80 | female | 58 | right | temporal | subarachnoid hemorrhage |
|  | K290415_2 | NA |  | 0.4 | 350Hz/acc. 1 | -91 | female | 32 | left | frontal | subcortical neoplasia |
| **pvBC-pvBC pairs** |  |  |  |  |  |  |  |  |  |  |  |
|  | K151217_3  presynaptic | strept | pv+, vGAT+ | 0.6 |  | -83 | female | 19 | right | frontal | subcortical neoplasia |
|  | postsynaptic | NA |  | 0.5 |  | -73 |  |  |  |  |  |
|  | K190619_1 mutual pair |  |  |  |  |  | female | 56 | left | temporal | subcortical neoplasia |
|  | cell 1 | NA |  | 0.55 |  | -64 |  |  |  |  |  |
|  | cell 2 | NA |  | 0.6 |  | -58 |  |  |  |  |  |
| **Fig 2 exp. In mouse** |  |  |  |  |  |  |  |  |  |  |  |
|  | K250618_1 | strept |  | 0.4 |  | -75 |  |  |  |  |  |
|  | K260618_2 | strept |  | 0.5 |  | -68 |  |  |  |  |  |
|  | K260618_5 | strept |  | 0.5 |  | -76 |  |  |  |  |  |
|  | K020718_3 | strept |  | 0.4 |  | -83 |  |  |  |  |  |
|  | K030718_1 | strept |  | 0.55 |  | -78 |  |  |  |  |  |
|  | K030718_3 | NA |  | 0.7 |  | -85 |  |  |  |  |  |
|  | K290618_2 | strept | pv+ | 0.6 |  | -75 |  |  |  |  |  |
|  | K290618_3 | strept | pv+ | 0.5 |  | -83 |  |  |  |  |  |
|  | K290618_4 | strept |  | 0.5 |  | -73 |  |  |  |  |  |
|  | V260618_1 | strept |  | 0.5 |  | -68 |  |  |  |  |  |
|  | V290618_4 | strept | pv+ | 0.7 |  | -86 |  |  |  |  |  |
| **Fig 4 exp.** |  |  |  |  |  |  |  |  |  |  |  |
|  | V101118_1 | strept | pv+ | 0.6 | 180Hz/acc. 0.76 | -76 | male | 20 | right | frontal | hydrocephalus |
|  | V150219_2 | strept | pv+ | 0.7 | 110Hz/acc. 0.8 | -64 | female | 67 | right | occipital | subcortical neoplasia |
|  | V150219_3 | strept | pv non concl. | 0.7 | 120Hz/acc. 0.8 | -64 | female | 67 | right | occipital | subcortical neoplasia |
|  | V260219_2 | strept | pv non concl. | 0.6 |  | -67 | male | 68 | no info | temporal | hydrocephalus |
|  | V050419_2 | strept | pv non concl. | 0.5 |  | -73 | female | 22 | right | frontal | hydrocephalus |
|  | V290319_1 | strept | pv non concl. | 0.5 | 210Hz/acc. 0.8 | -79 | male | 51 | no info | no info | hydrocephalus |
|  | V290319_2 | NA |  | 0.5 | 170Hz/acc. 0.9 | -68 | male | 51 | no info | no info | hydrocephalus |
|  |  |  |  |  |  |  |  |  |  |  |  |
| NonFSINs | V260219_1 | strept | pv-, vGAT+ | 1 | 80Hz/acc. 0.12 | -64 | male | 68 | no info | temporal | hydrocephalus |
|  | V120219_1 | strept | pv and vGAT non concl. | 0.8 |  | -68 | female | 66 | right | frontal | astrocytoma |
|  | V080119_2 | strept | vGAT+ | 0.9 |  | -81 | male | 49 | right | frontal | colloid cyst |
|  | v080119_1 | strept | pv-, vGAT+ | 0.8 | 130Hz/acc. 0.5 | -74 | male | 49 | right | frontal | colloid cyst |
|  | V160119_1 | strept | pv non concl. | 0.85 |  | -65 | male | 58 | left | frontal | epithelial carcinoma metaplasia |
|  | V131218_1 | strept | pv and vGAT non concl. | 0.9 |  | -71 | female | 79 | right | temporal | hydrocephalus |
|  | V050419_1 | strept | vGAT+ | 0.85 |  | -56 | female | 22 | right | frontal | hydrocephalus |
|  | V080518_1 | strept | pv and vGAT non concl. | 1 | 140Hz/acc. 0.7 | -81 | female | 68 | right | frontal | tumor |
| nonFSIN in results not in figures |  |  |  |  |  |  |  |  |  |  |  |
|  | V190918_3 | strept | pv- | 0.9 | 120Hz/acc. 0.5 | -73 | male | 21 | right | temporo-occipital | subcortical cystic neoplasm |
|  | V311017_2 | strept | pv- | 0.8 |  | -64 | female | 39 | right | frontal | glioblastoma |
|  | V091117_3 | strept | pv- | 1.2 |  | -63 | female | 63 | right | temporal | hydrocephalus |
|  | V100818_1 | strept | pv and vGAT non concl. | 0.9 |  | -59 | female | 46 | right | temporal | astrocytoma |
|  | V130618_1 | strept | pv- | 1.1 |  | -74 | female | 35 | right | temporal | subcortical neoplasia |
|  | V100518_2 | strept | pv and vGAT non concl. | 1 | 100Hz/acc. 0.6 | -76 | female | 73 | right | frontal | biopsy (MRI: multifocal lesions) |
|  | V220218_1 | strept | pv and vGAT non concl. | 0.85 |  | -74 | male | 42 | left | frontal | subcortical neoplasia |
|  | V091117_2 | strept | pv- | 0.9 | 90Hz/acc. 0.44 | -83 | female | 63 | right | temporal | hydrocephalus |
|  | K231117_4 | strept | pv- | 0.8 | 80Hz/acc. 0.5 | -88 | female | 68 | right | temporal | hydrocephalus |
|  | V151117_1 | NA |  | 0.9 | 60Hz/acc. 0.3 | -64 | female | 61 | right | frontal | fibrillic astrocytoma |
|  | K300119_1 | strept | pv and vGAT non concl. | 0.7 | 110Hz/acc. 0.5 | -83 | female | 69 | no info | no info | hydrocephalus |
|  | K260219_2 | strept | pv- | 0.7 |  | -65 | male | 68 | no info | temporal | hydrocephalus |
|  | V231117_1 | strept | pv and vGAT non concl. | 0.8 |  | -88 | female | 68 | right | temporal | hydrocephalus |
|  | K181017_1 | strept | pv and vGAT non concl. | 0.8 |  | -66 | female | 78 | right | frontal | hydrocephalus |
| **Fig 5 exp.** |  |  |  |  |  |  |  |  |  |  |  |
|  | V190619_2 | strept | pv+ | 0.6 | 230Hz/acc. 0.8 | -75 | female | 56 | no info | no info | hydrocephalus |
|  | V190619_3 | strept | pv+ | 0.55 | 170Hz/acc. 0.7 | -75 | female | 56 | no info | no info | hydrocephalus |
|  | V190619_4 | strept | pv+ | 0.6 | 150Hz/acc. 0.86 | -72 | female | 56 | no info | no info | hydrocephalus |
