# Supplementary material for: Robust perisomatic GABAergic self-innervation inhibits basket cells in the human and mouse supragranular neocortex
Source: eLife. 2020 Jan 9;9:e51691. doi: 10.7554/eLife.51691 (PMC6984819; doi:10.7554/eLife.51691)
Supplement: Supplementary file 2. [file elife-51691-supp2.xlsx]

## Sheet: Taul1
cell code	Cm (pF)	Egaba-a (mV)		Gleak (nS)	Gaut peak amplitude (nS)	Gaut peak delay (ms)	Gaut decay tau (ms)		Gahp peak (nS)	Gahp peak delay (ms)	Gahp decay tau (ms)
k151217_2	52.0239	-79		8.31401	3.1724	3.6	6.3		20.2165	1.16	5.15833
k080917_1	28.56	-78		7.12928	4.5172	2.5	5.1		6.75495	1.02	7.51667
k121217_1	30.5556	-82		5.20472	1.931	2.1	4.1		17.3594	0.91	6.65833
k150218_1	86.9604	-78		8.99281	4.0714	2.5	2.5		28.9499	0.59	3.76667
k151217_3	24.93	-81		4.69764	7.375	2.3	5.2		17.5896	0.88	2.9
k231117_2	51.7928	NA		13.4392	0.6579	2.4	NA		29.7082	0.54	2.66667
k150917_2	78.32	-78		8.96226	2.069	2.5	4.9		23.9905	1.06	7.63333
k270218_1	34.2857	-81		4.58515	3.4483	2.4	3.8		15.6478	0.83	7.00909
k260118_1	23.16	-80		5.55556	15.8276	1.6	3.4		12.018	0.61	6.8
k280218_1	45.69	-78		6.56109	3.5172	1.2	2.5		17.4688	0.48	2.9
k121217_3	52.02	-79		3.19149	5.3158	2.5	3.2		17.9679	0.58	3.36667
k231117_3	41.9353	-80		3.87931	2.5112	2.5	5		15.8878	0.6	8.56154
k260118_2	23.92	-78		2.72765	9.6087	1.8	4		7.40475	1.07	4.94167
k200218_6	80.75	-75		8.15661	6.1379	2.4	4.3		13.8056	0.52	6.20833
